# Supplementary material for: Replication validity of genetic association studies
Source: Springer Nature journal article supplement (doi:10.1038/ng749), 2001-10-15

Meta-analyses and cumulative meta-analyses for the 36 examined genetic association topics. Each topic corresponds to the ID listed in table 1 (prefixed by A). Separate graphs are shown for fixed effects calculations (Mantel-Haenszel model) and for random effects calculations (DerSimonian and Laird model). Each study is shown by the name of the first author and the number of subjects (or alleles) as well as an estimate of the odds ratio and 95% confidence interval (left panels) and the respective updated cumulative odds ratio and 95% confidence intervals including also all prior listed studies (right panels).

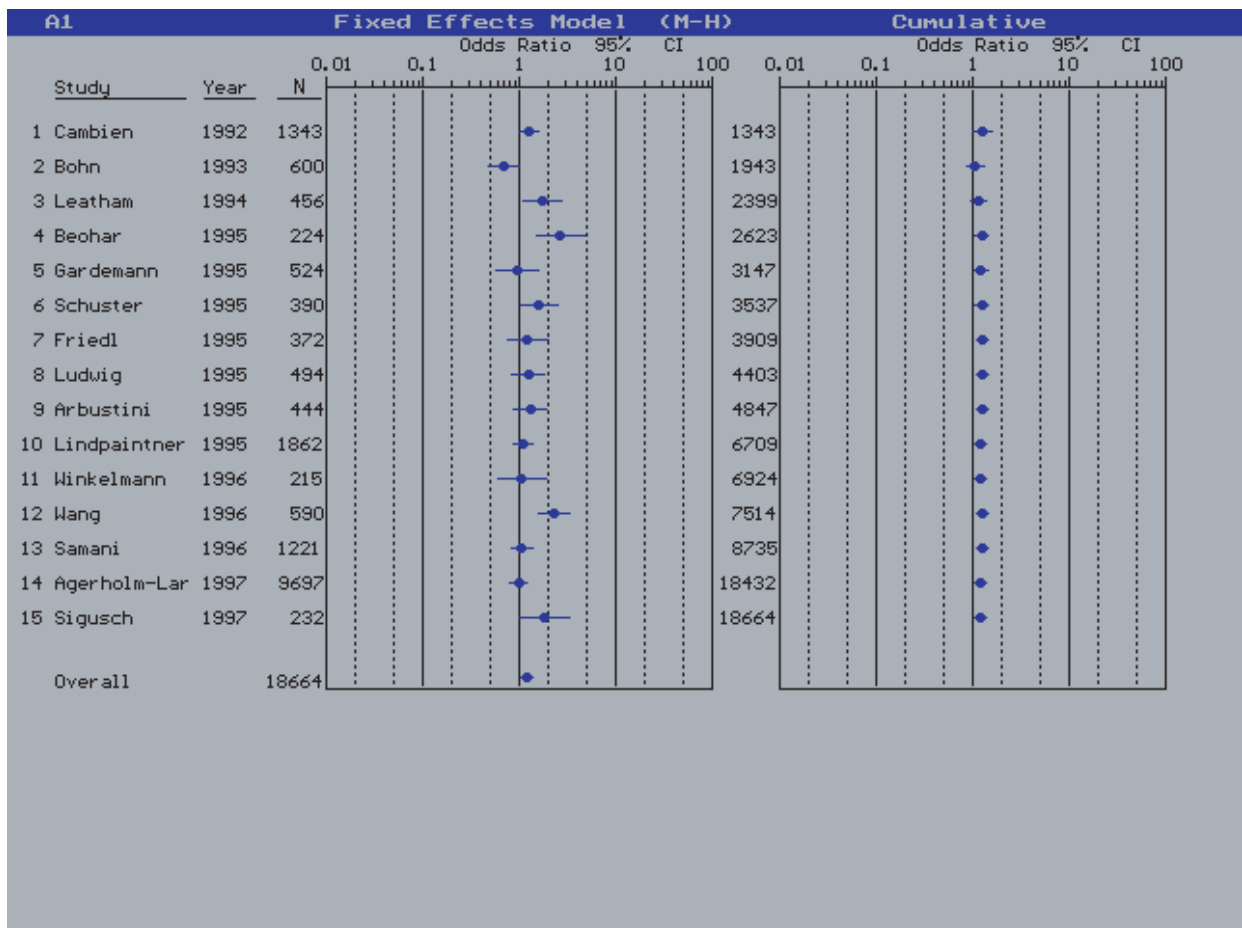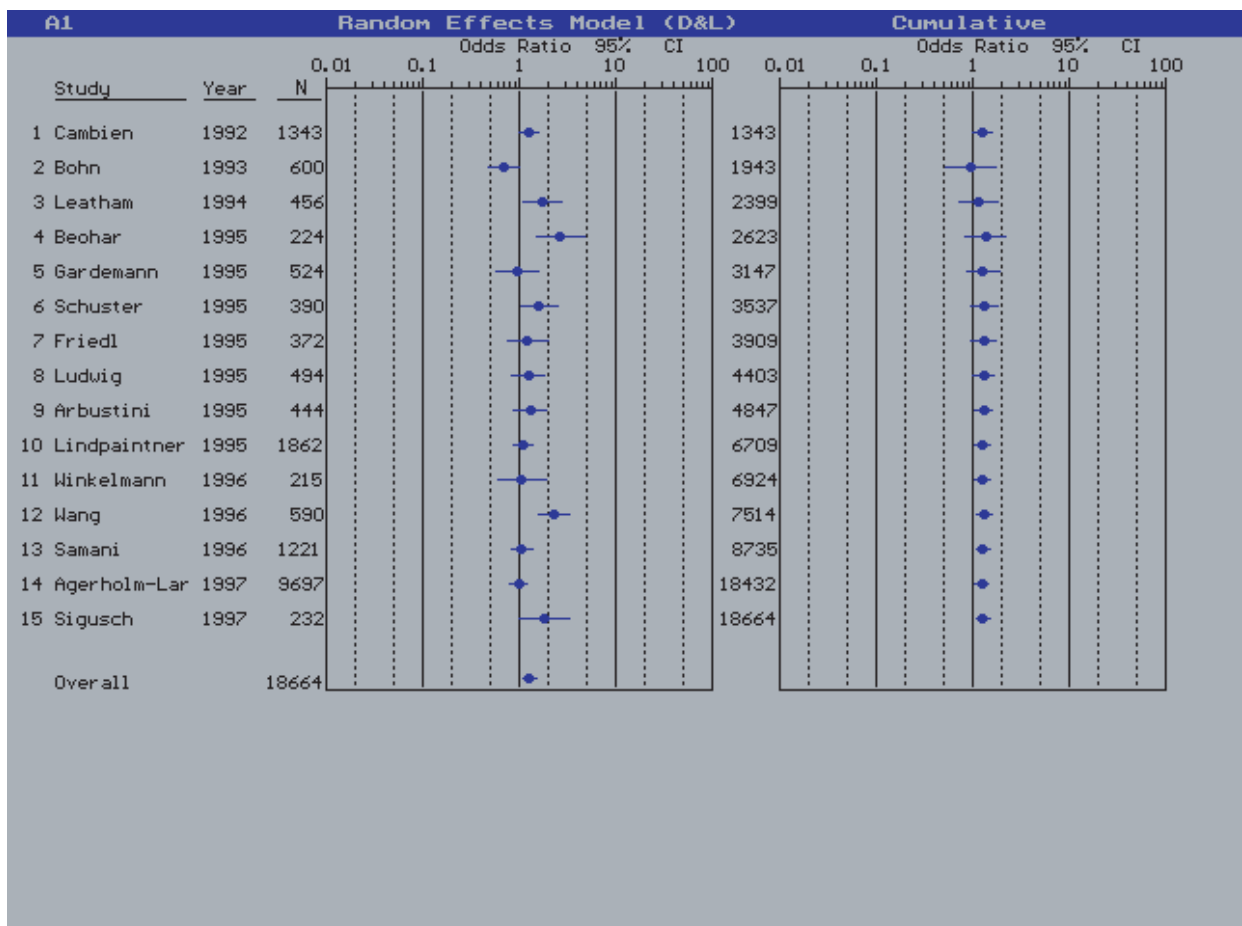

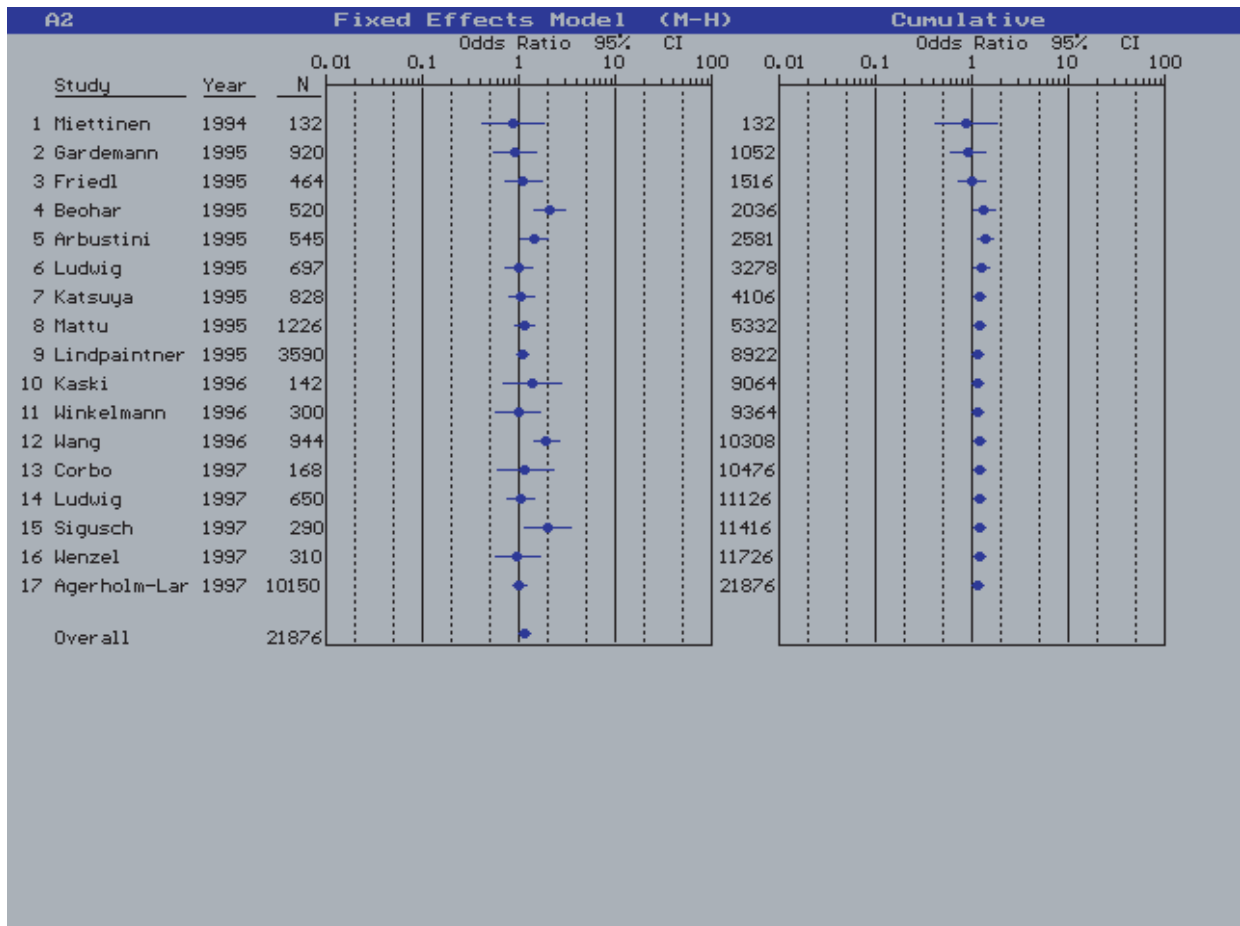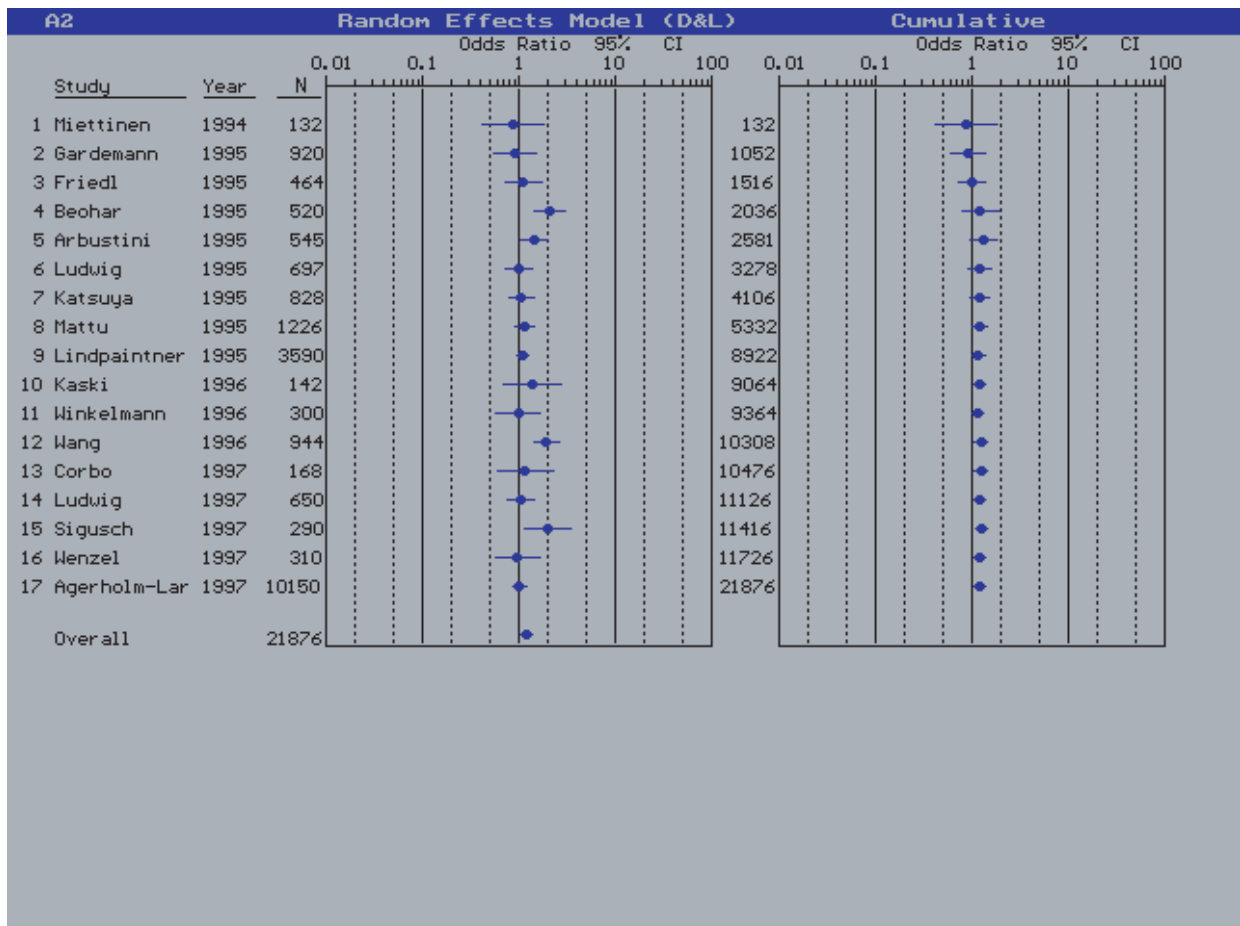

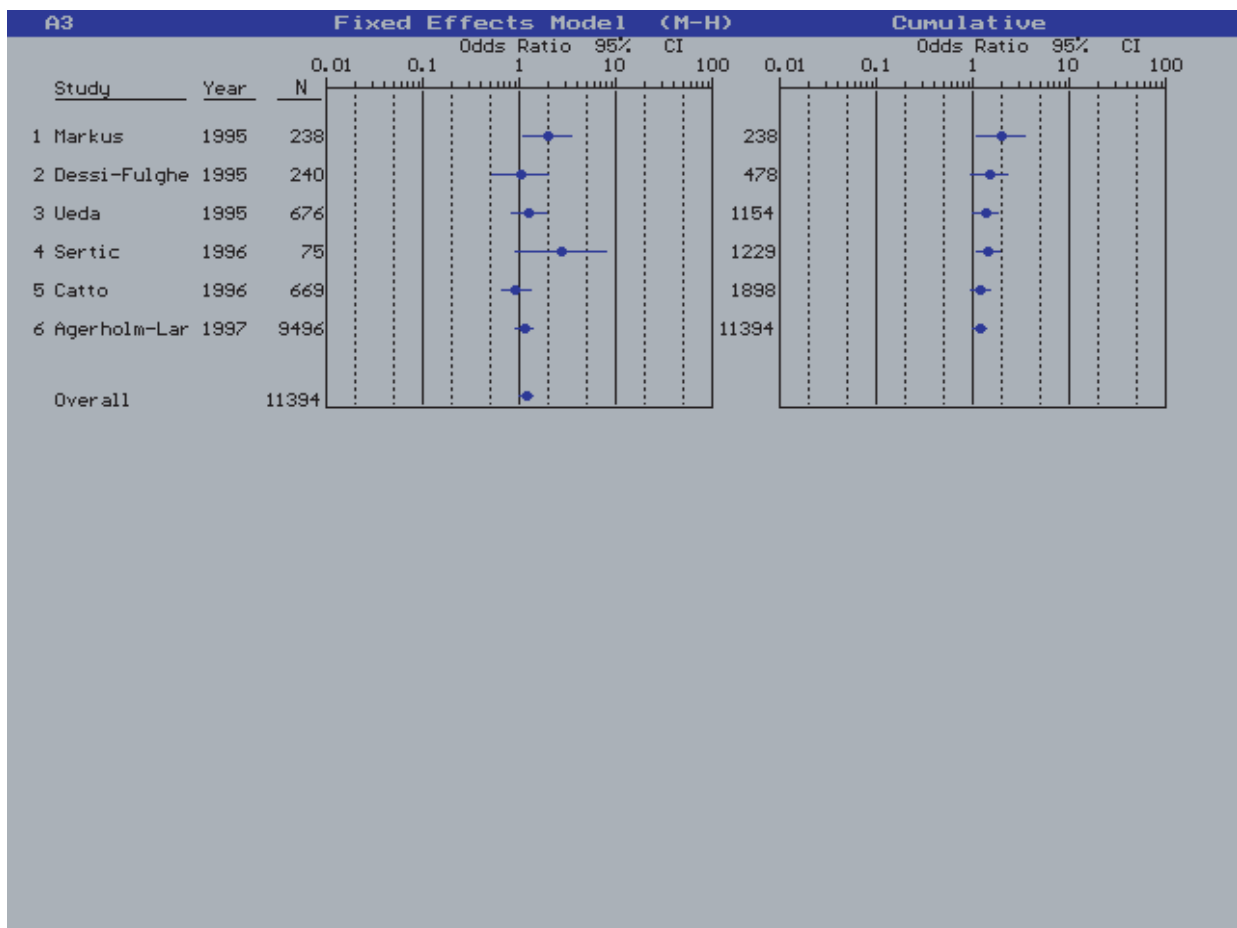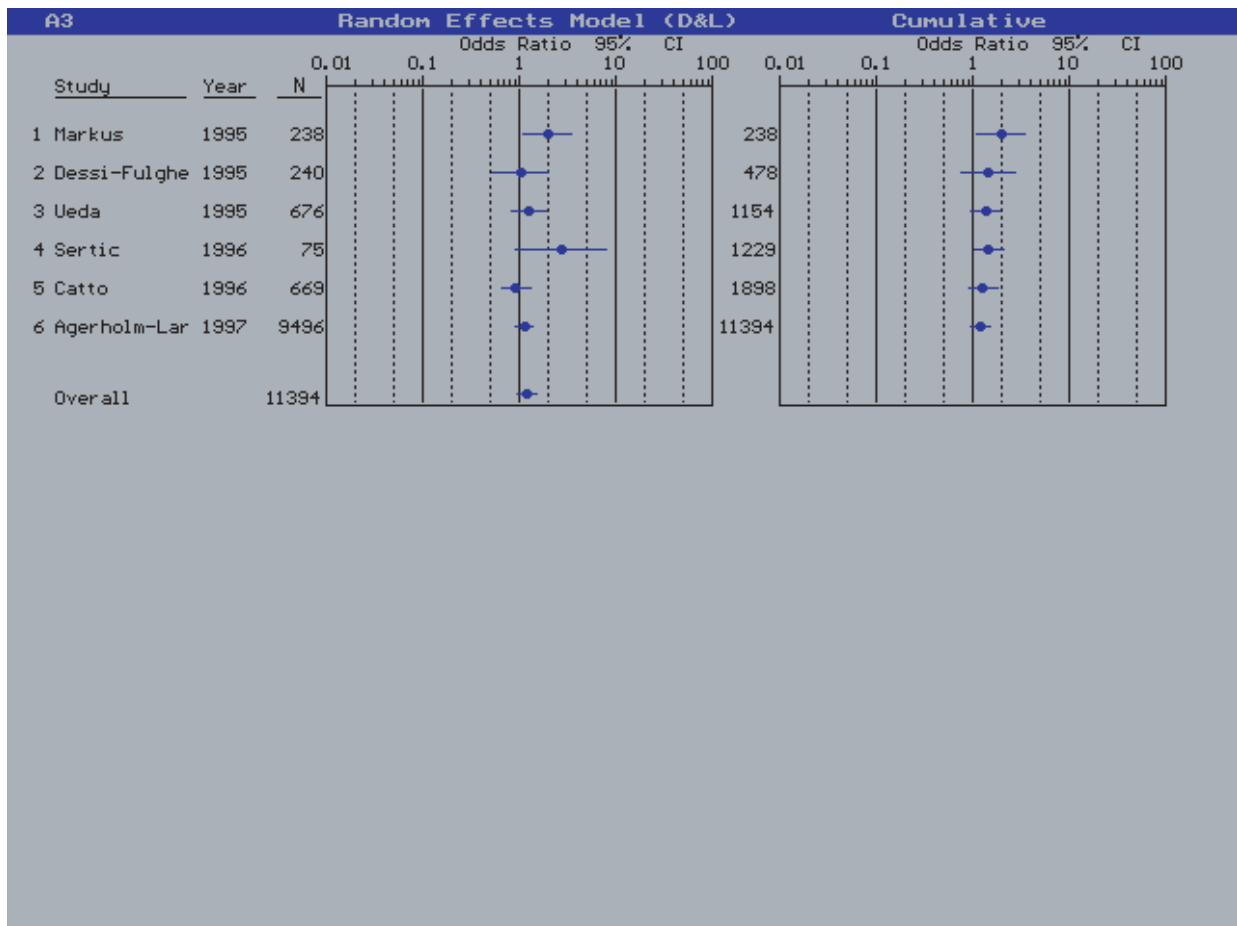

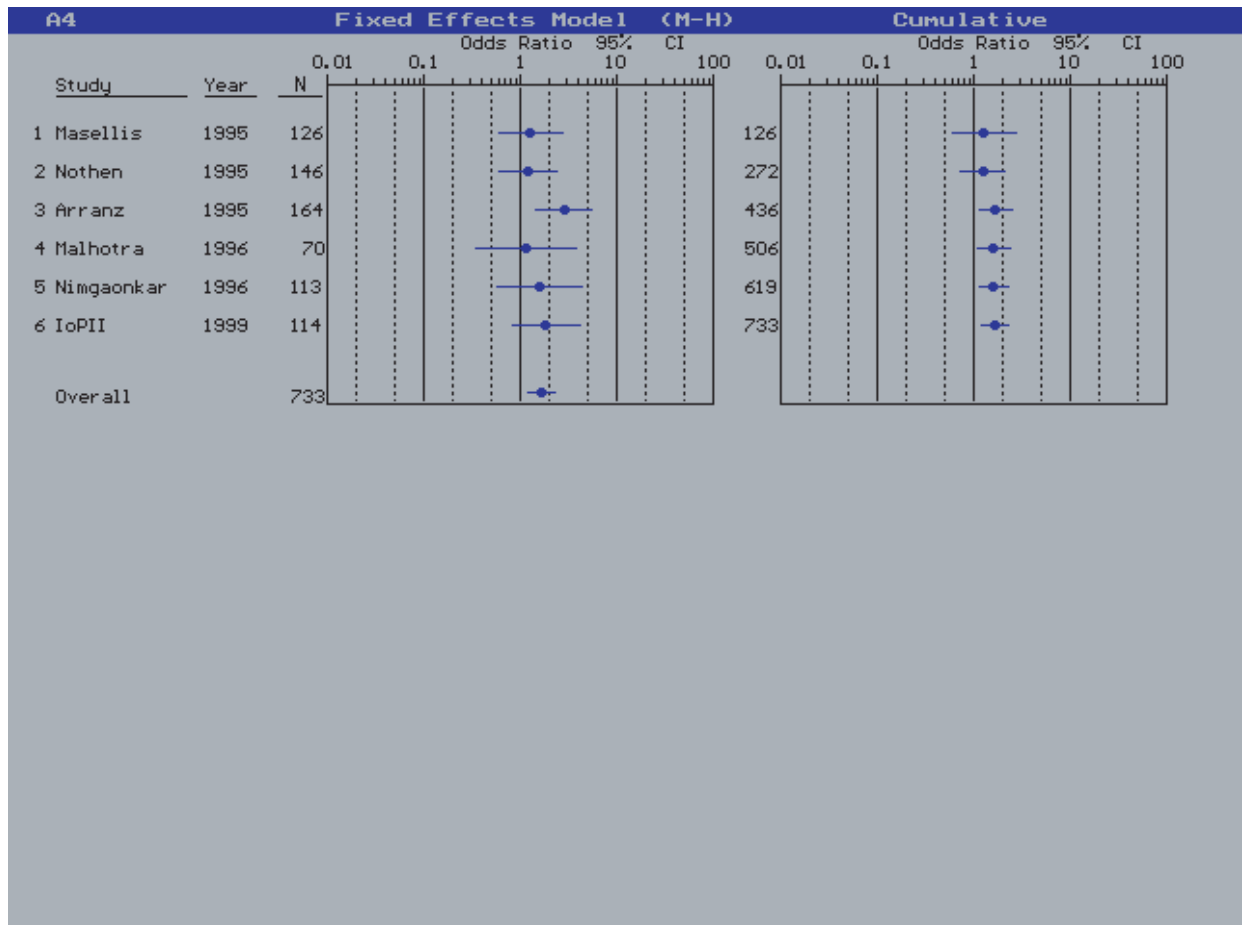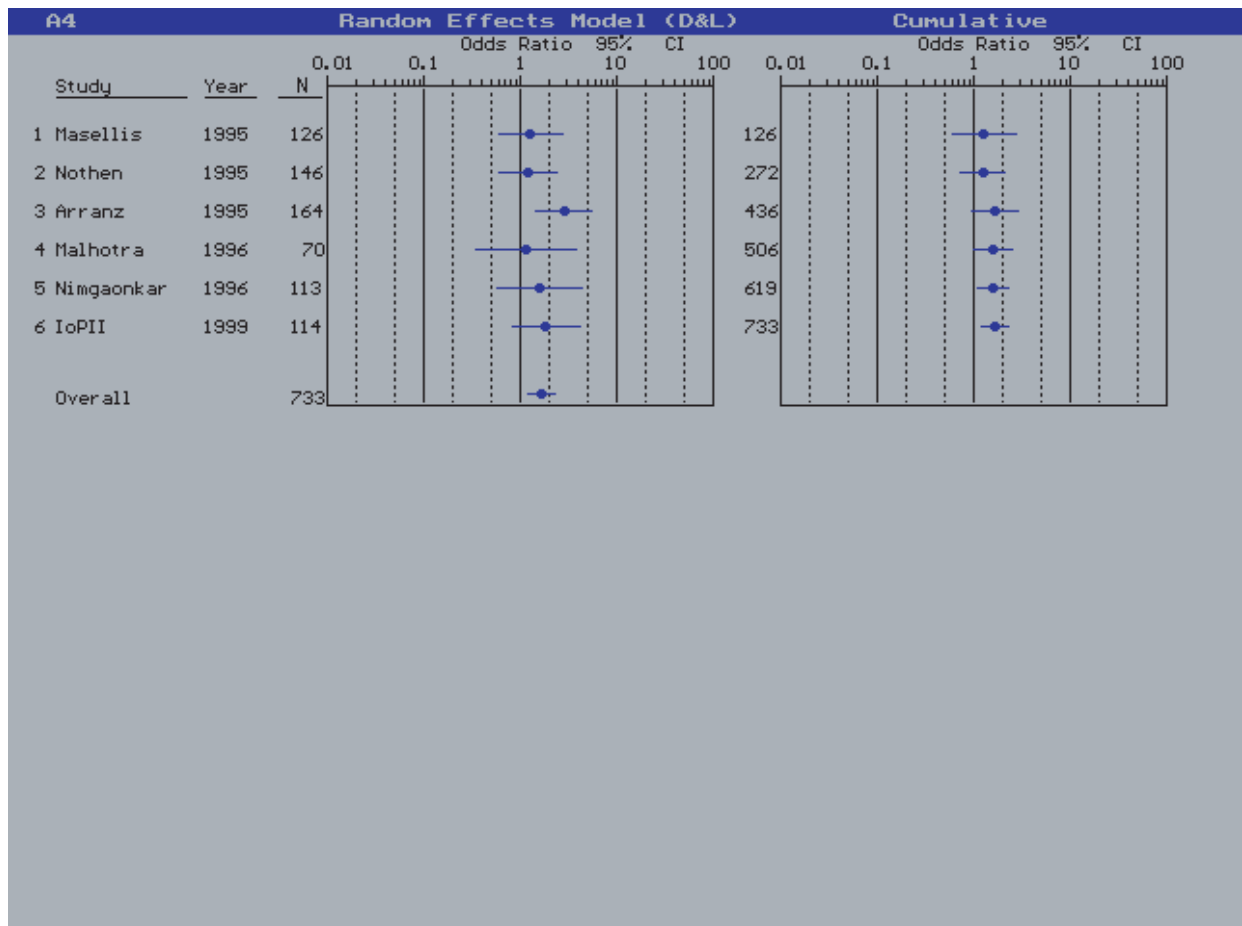

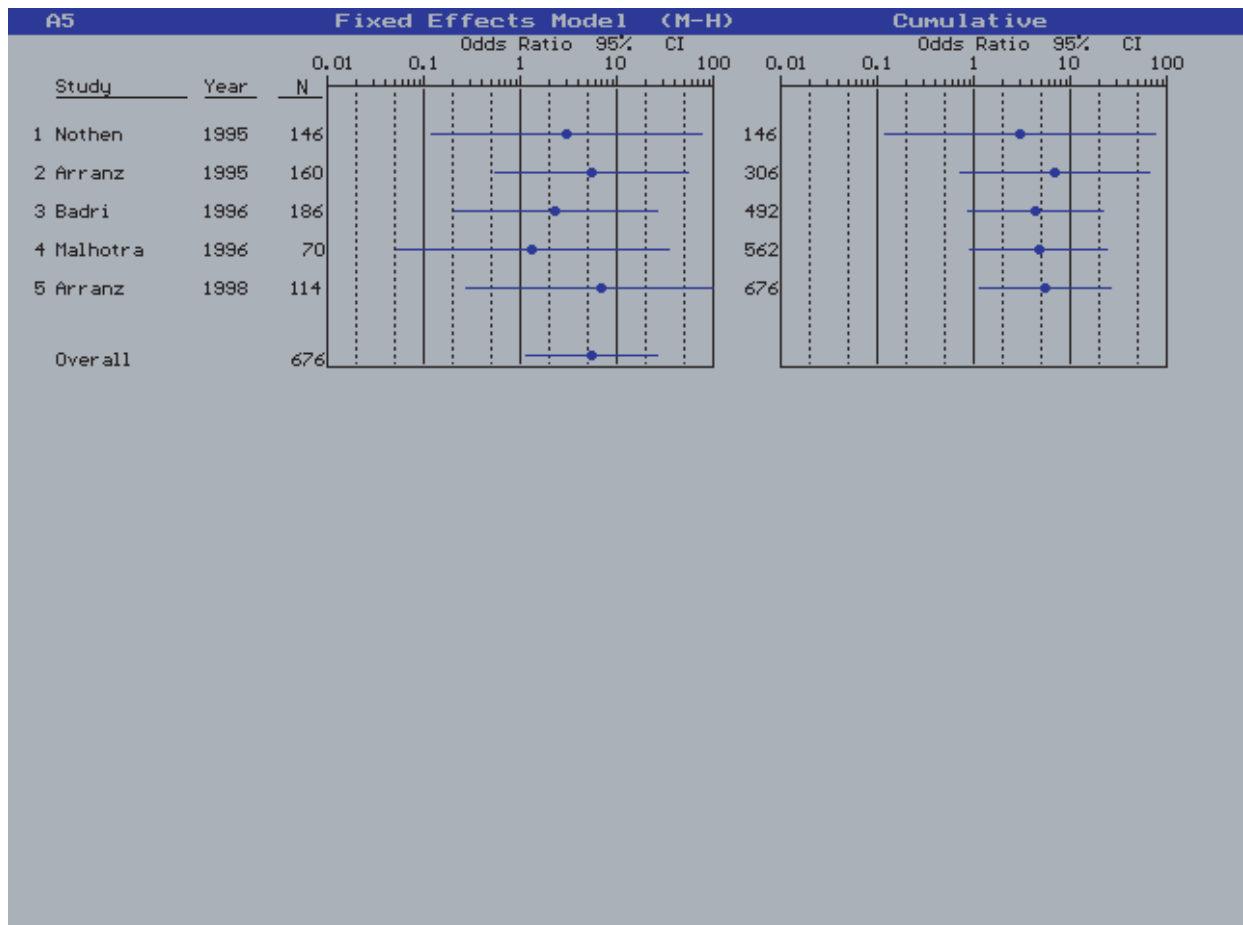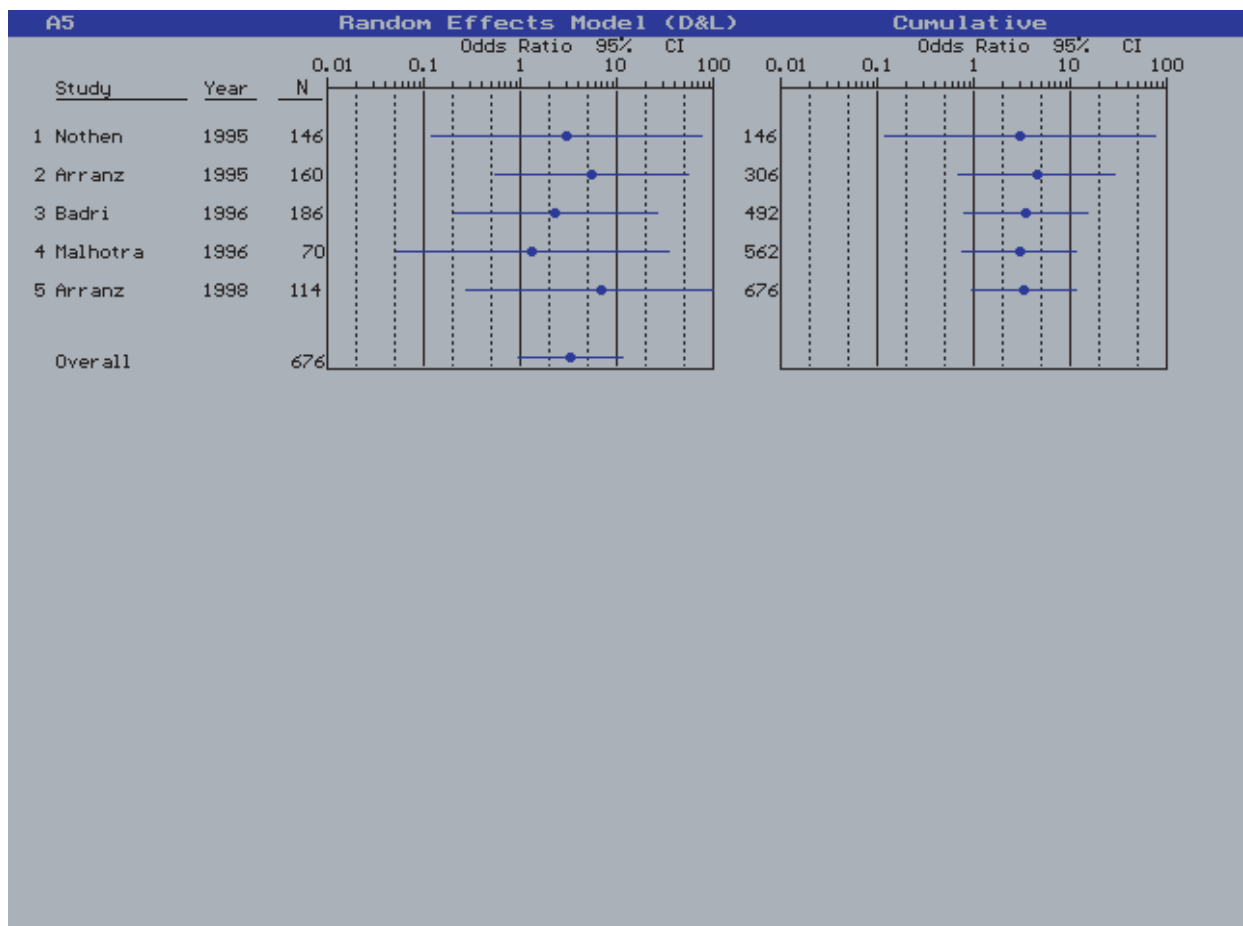

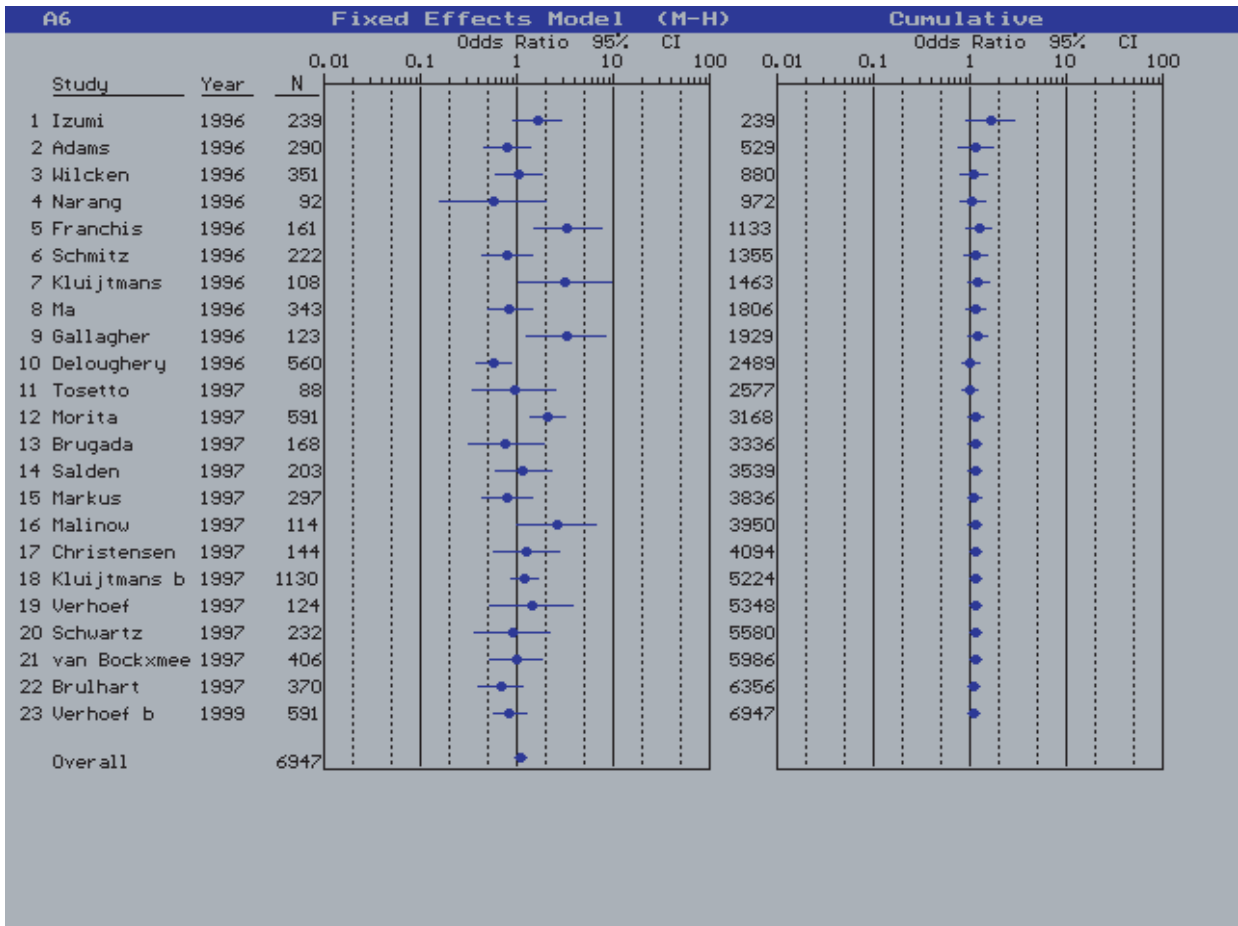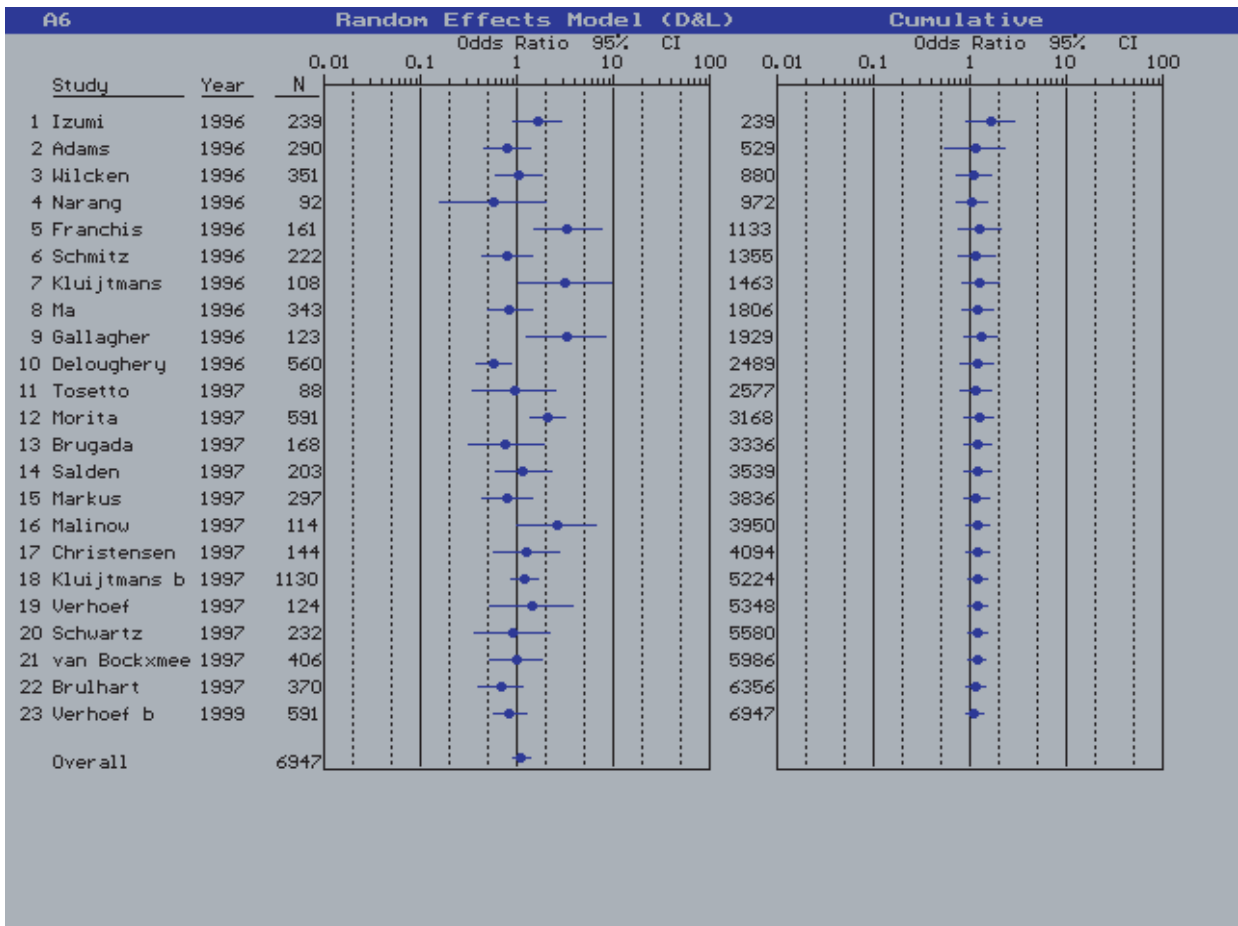

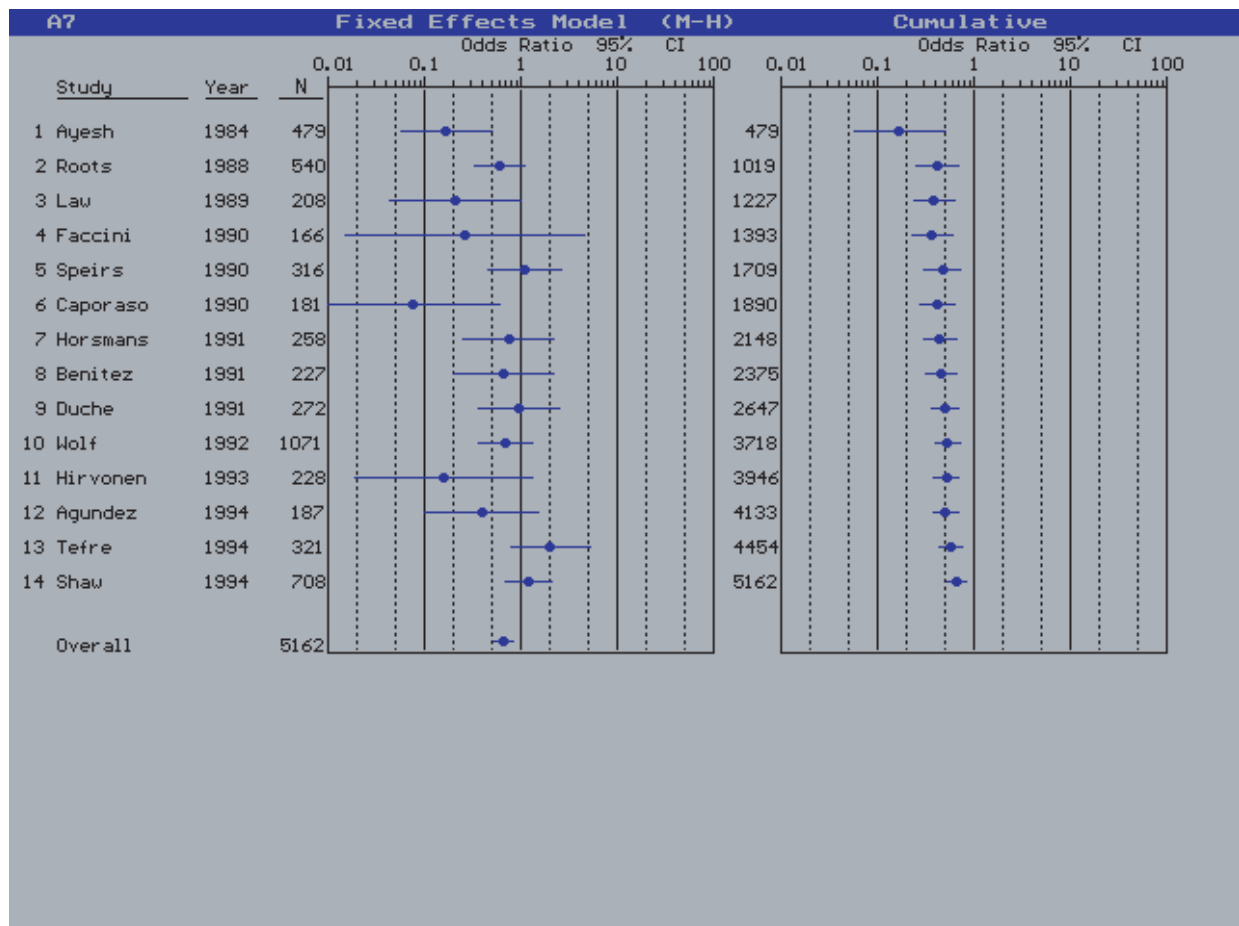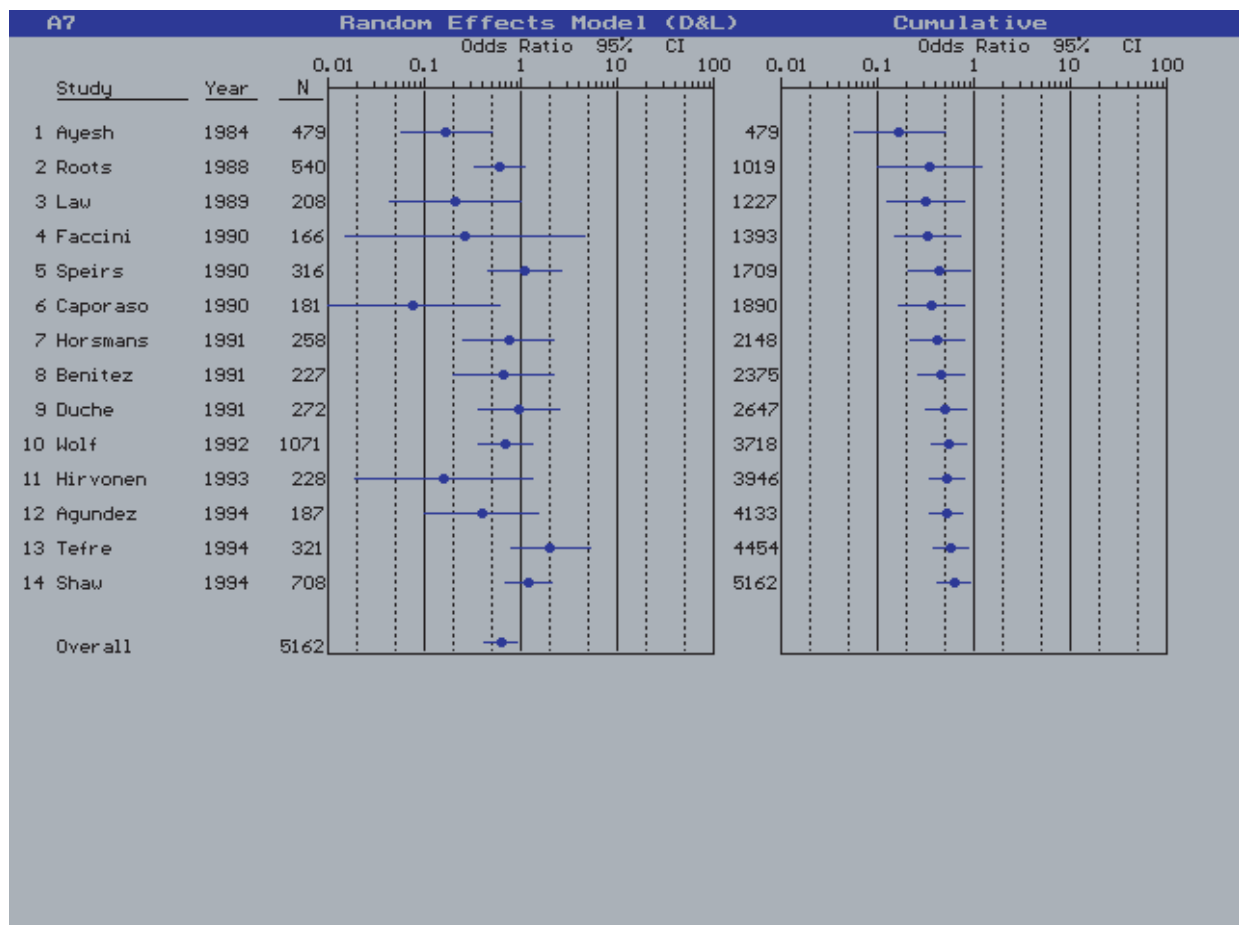



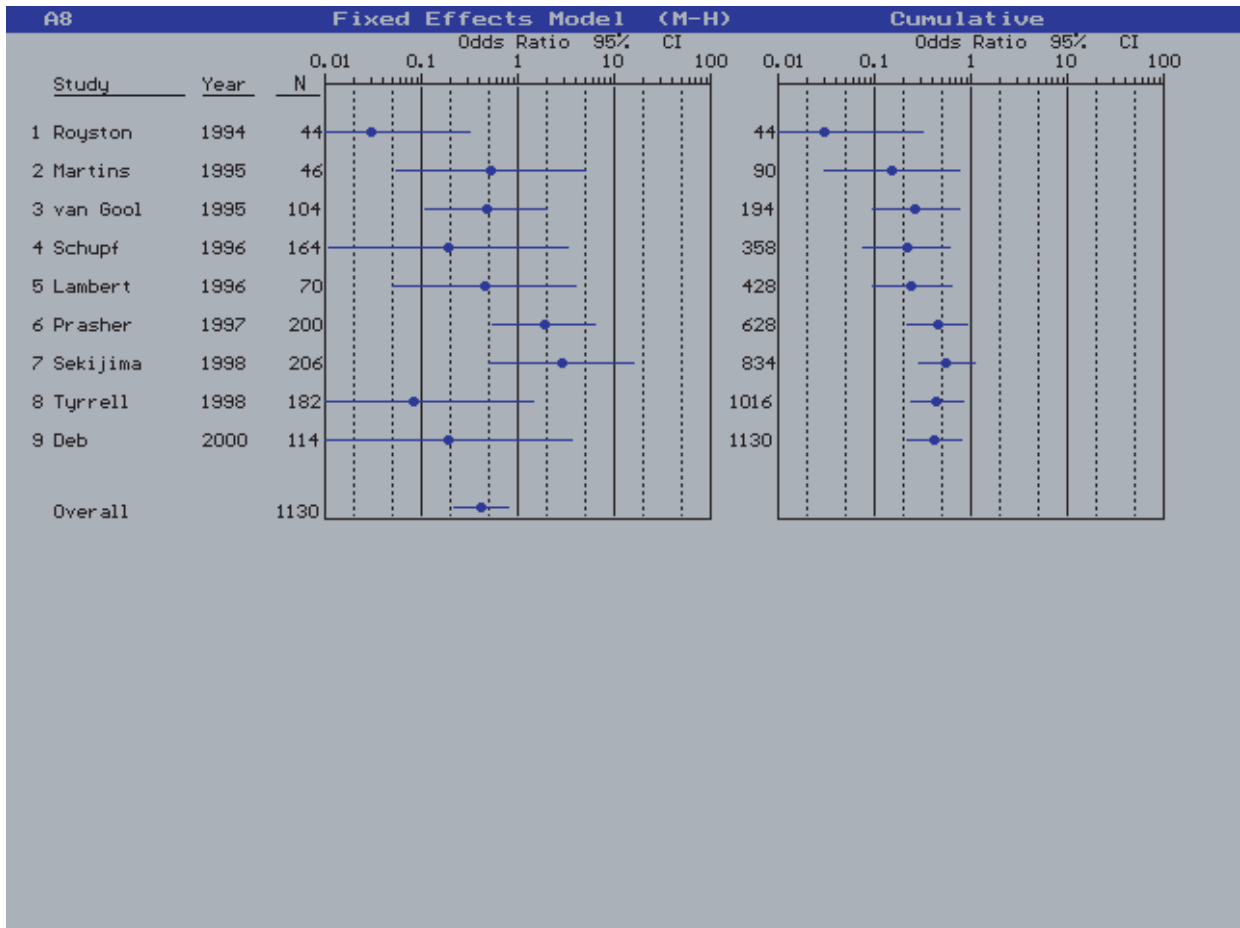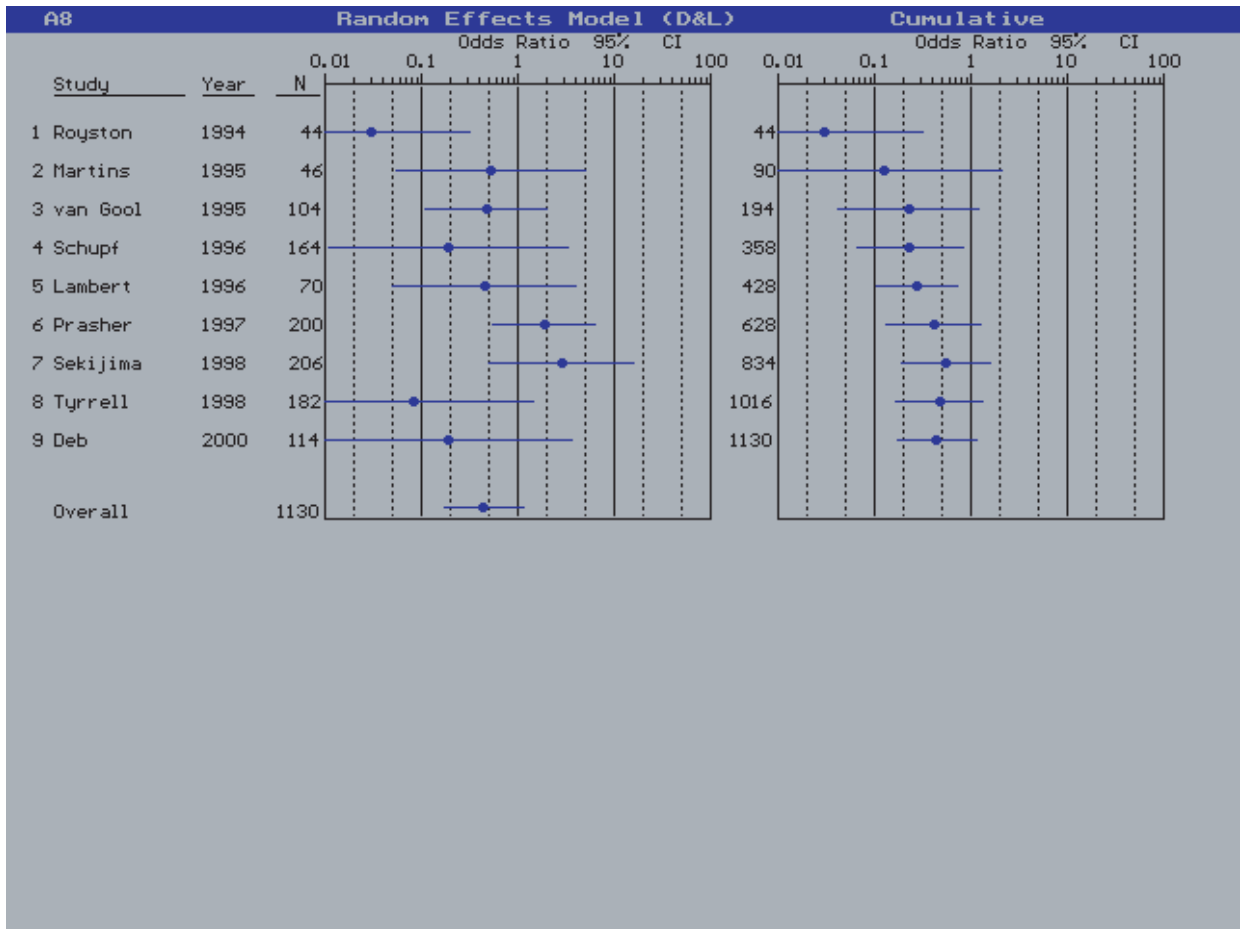

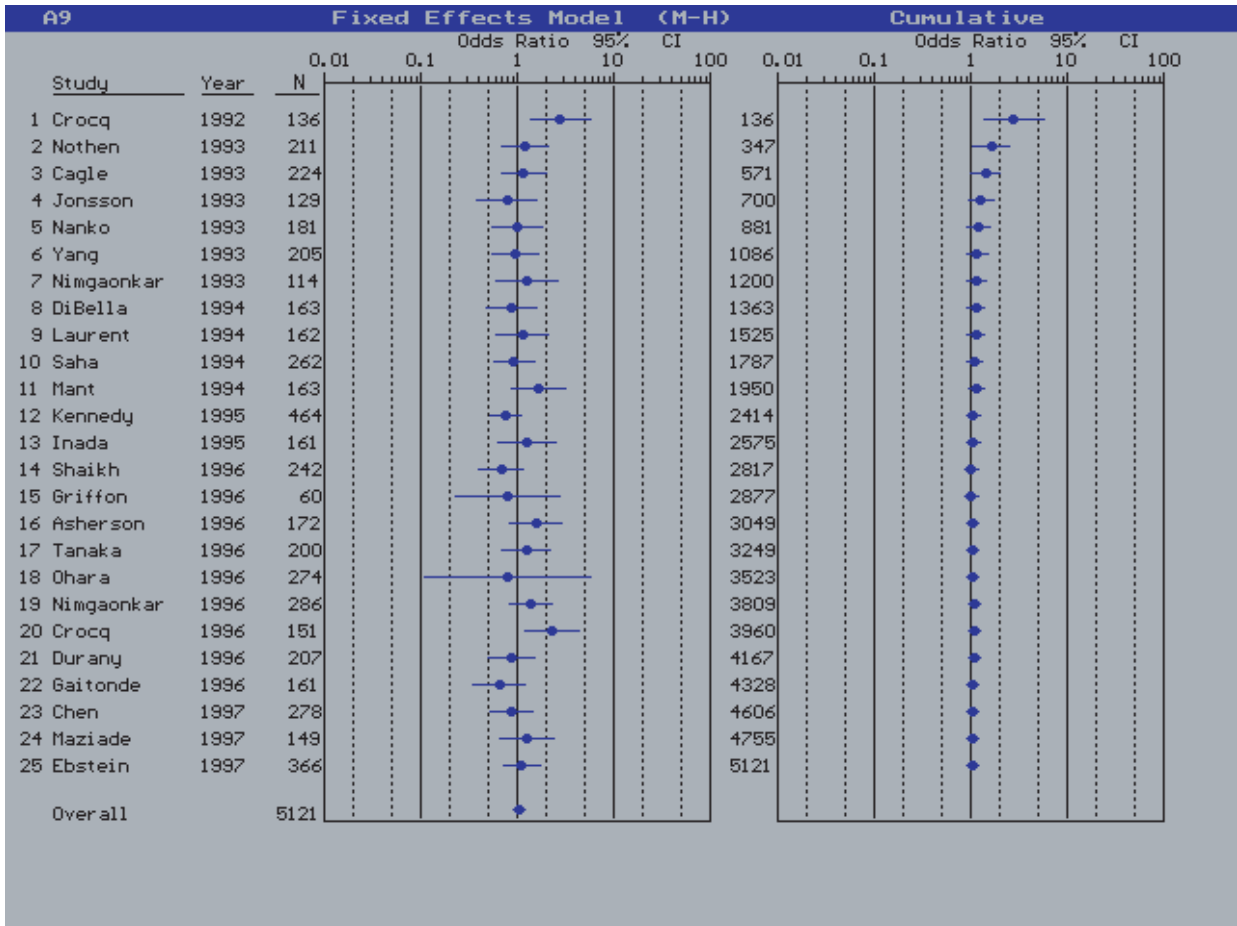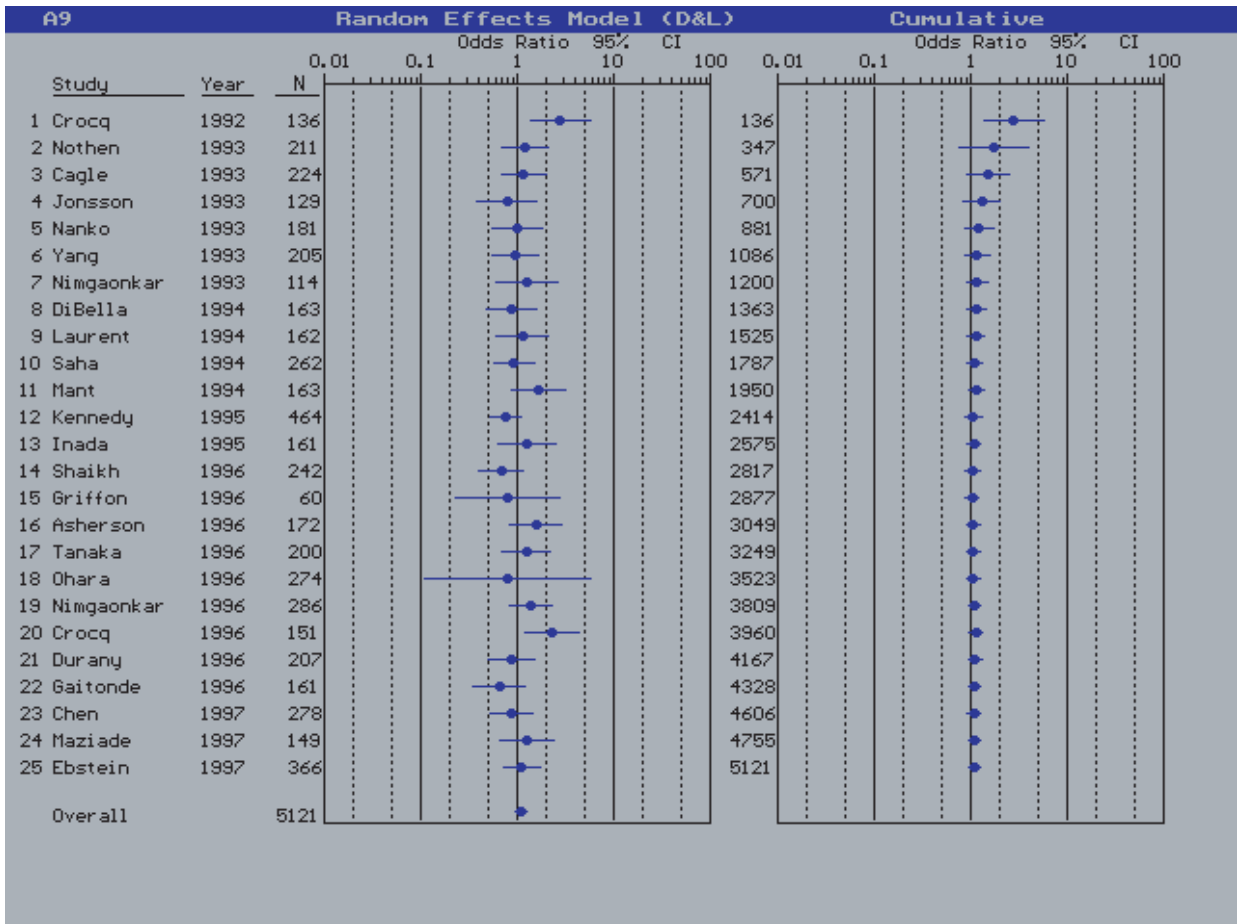

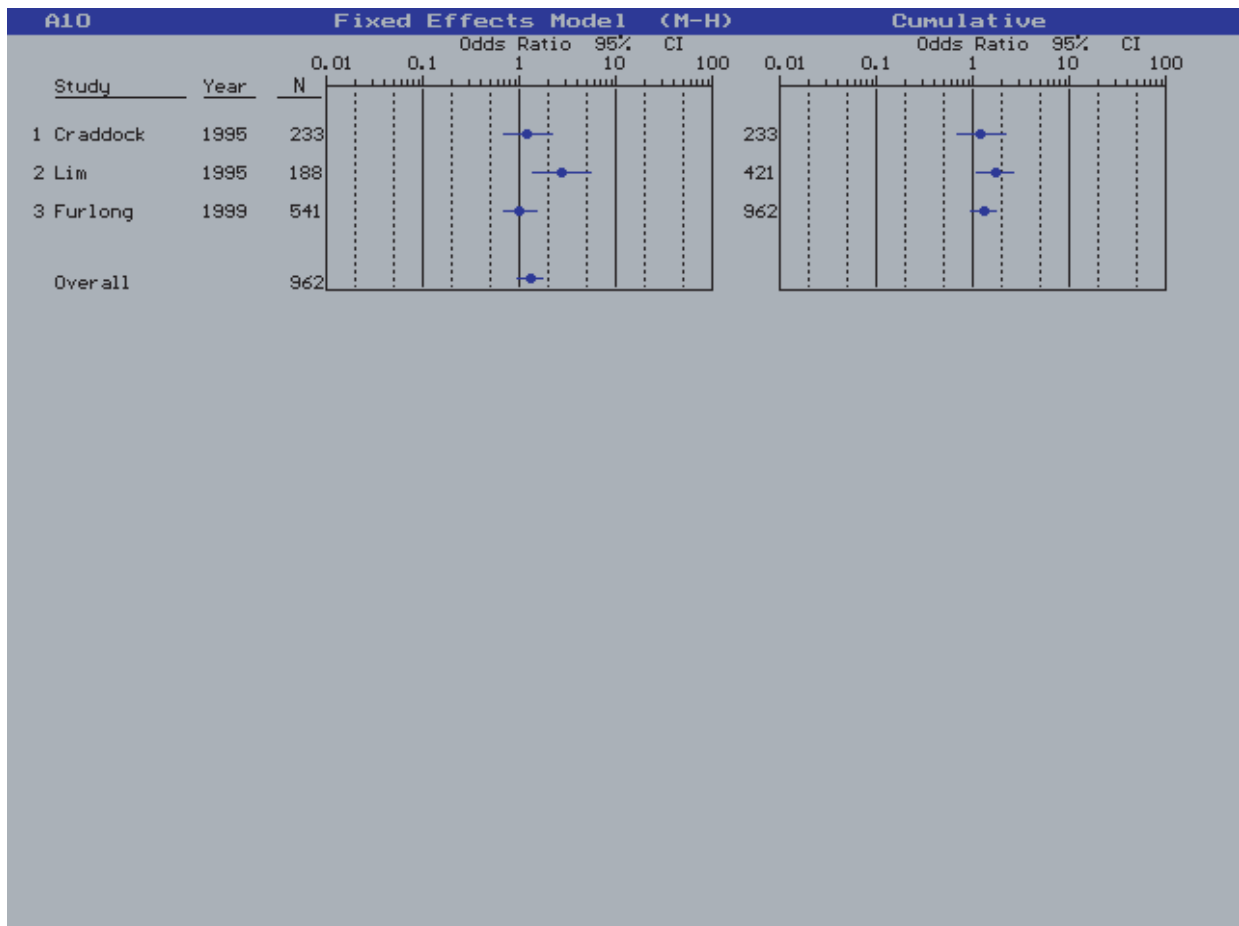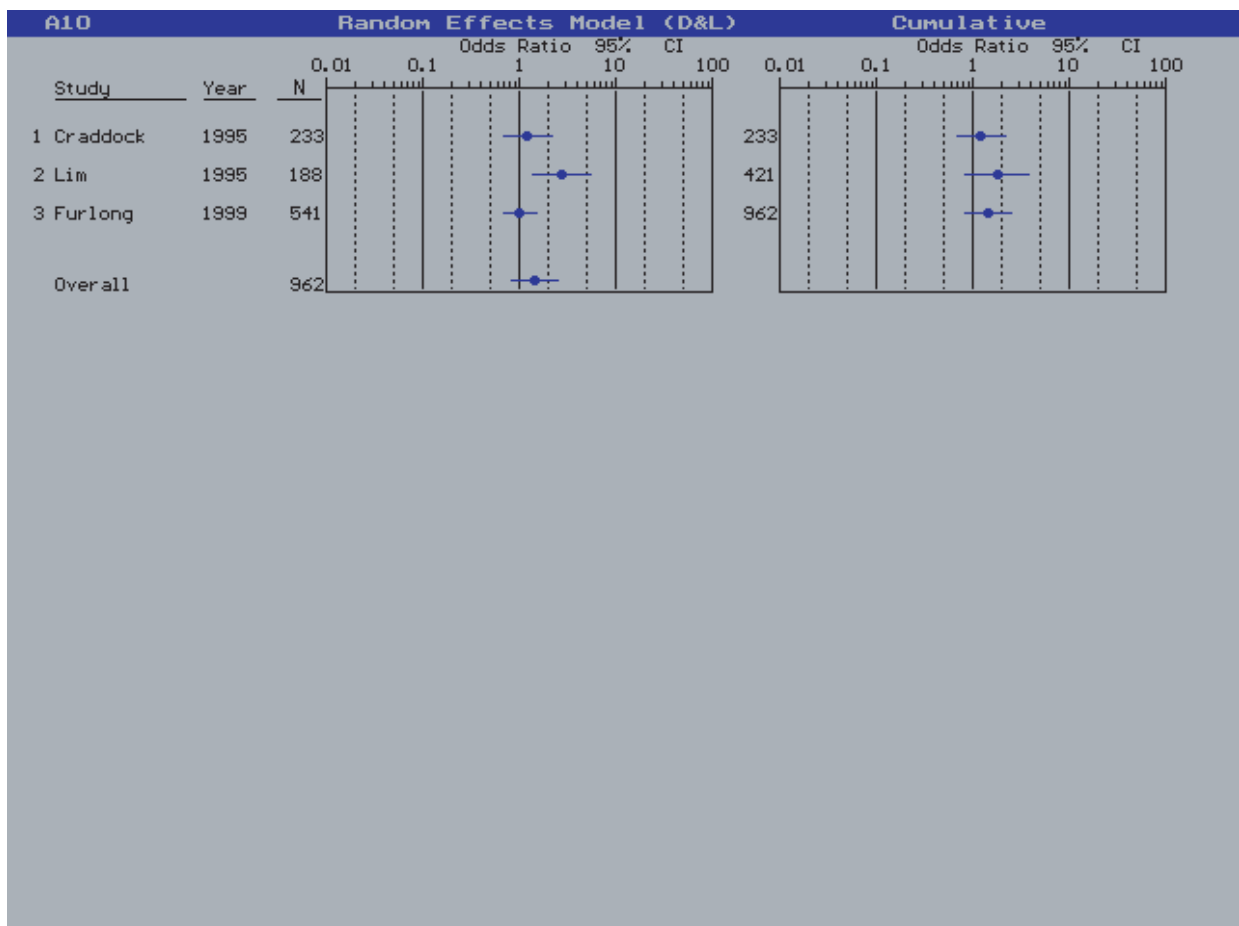

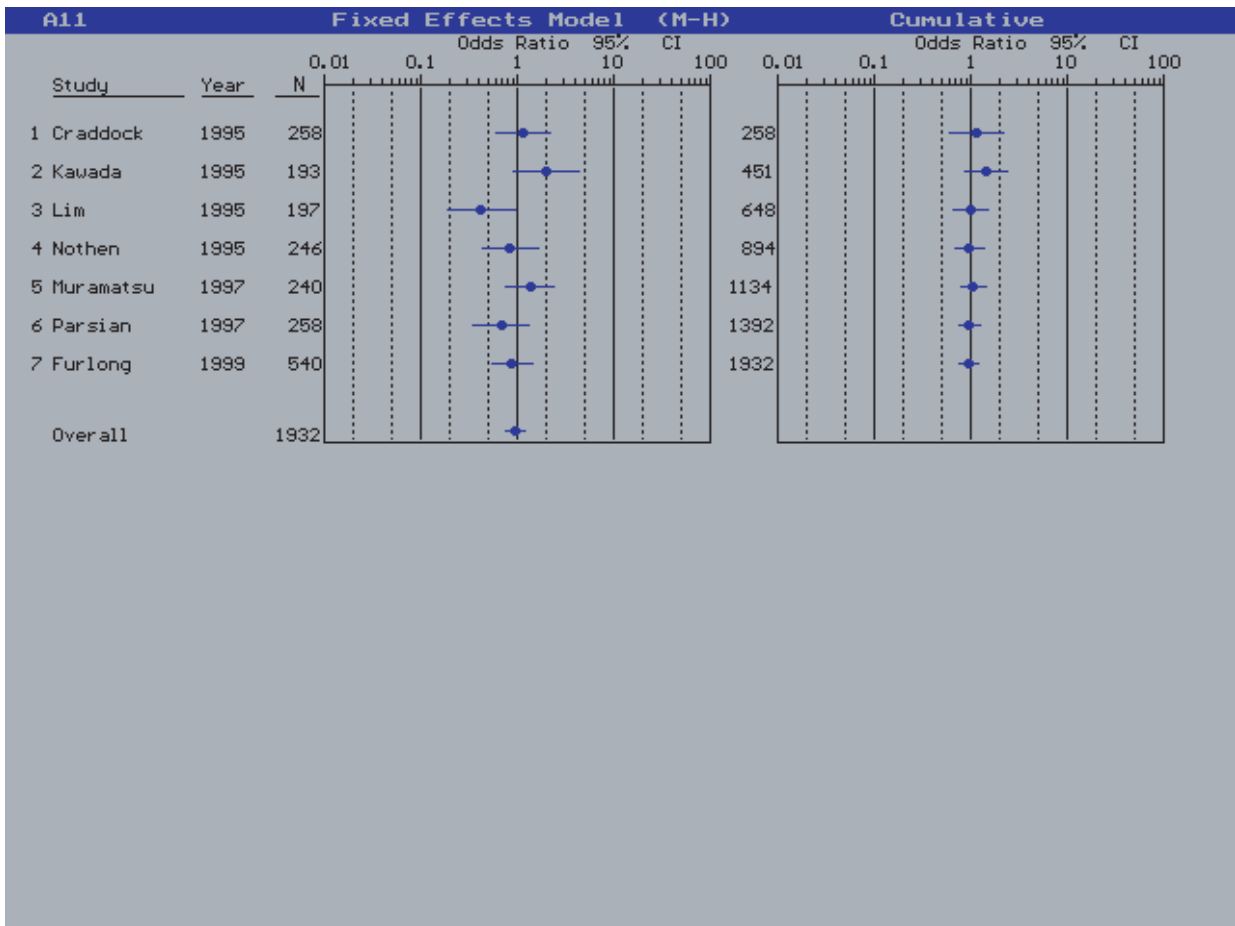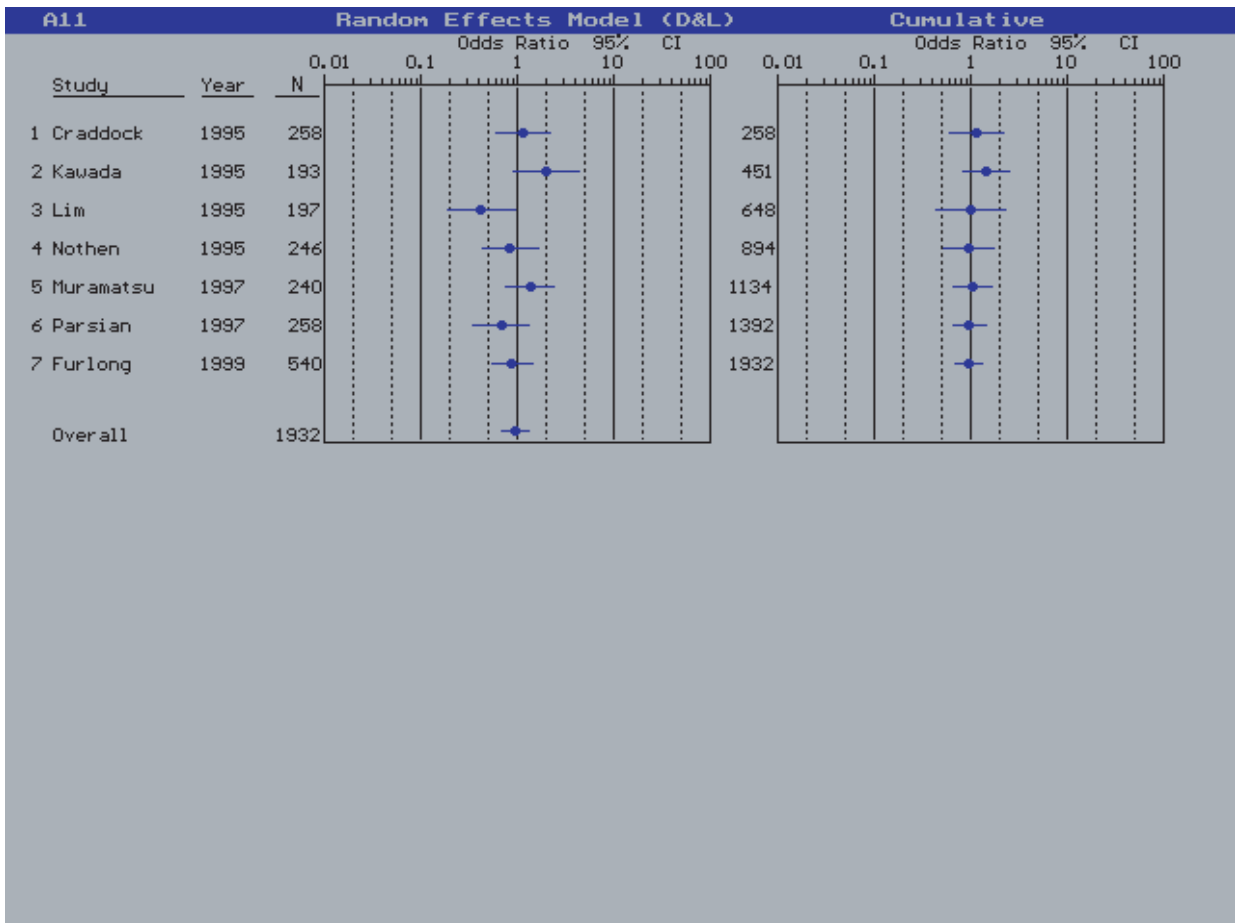

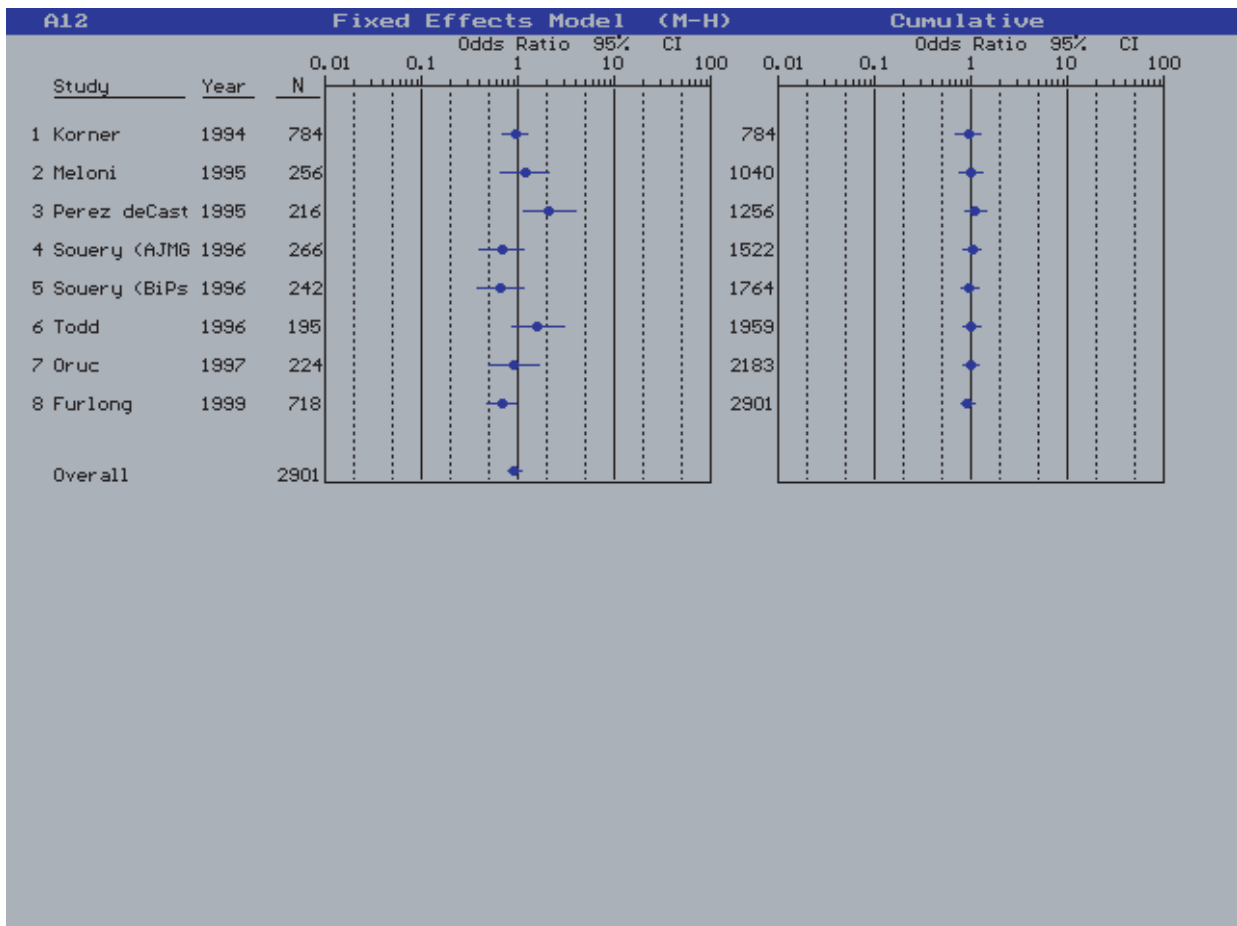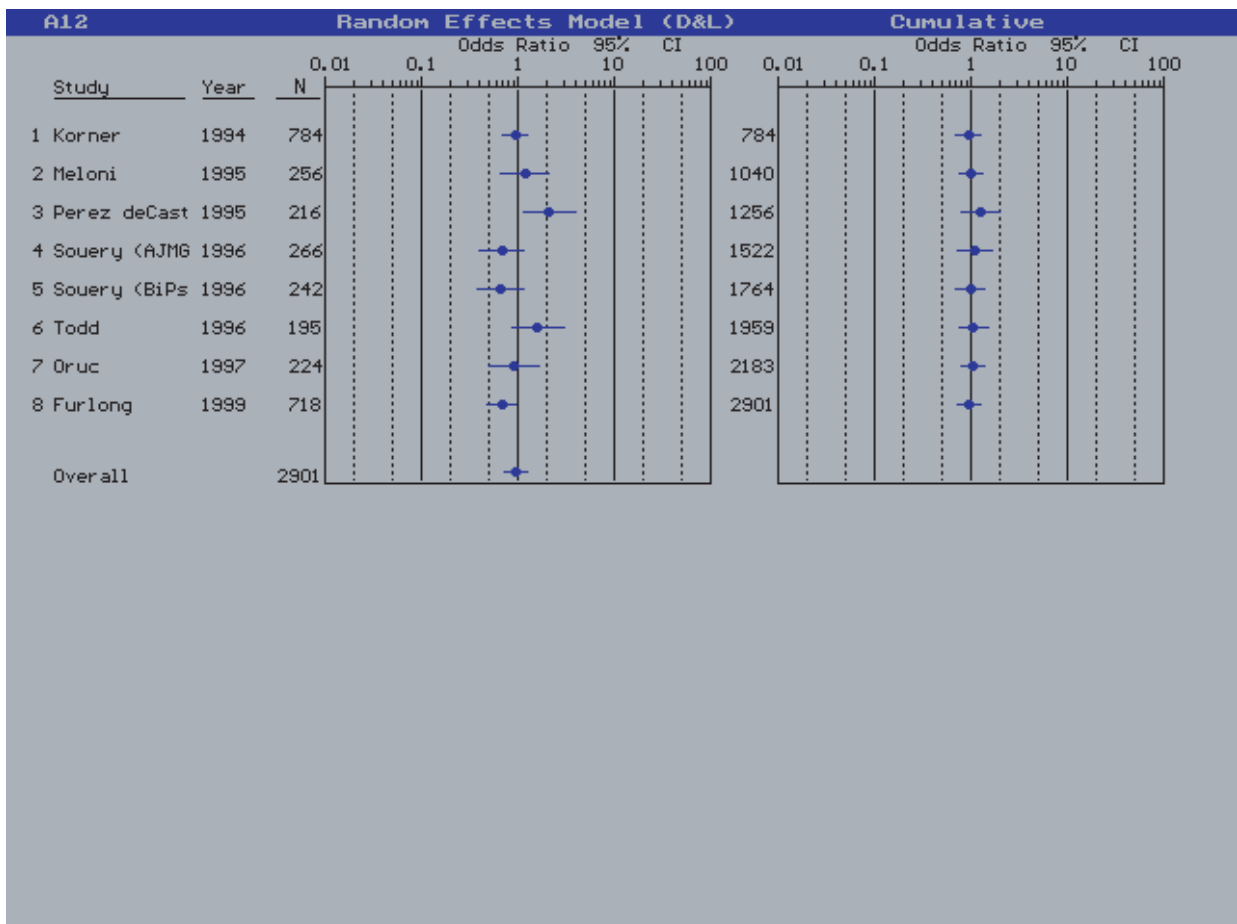

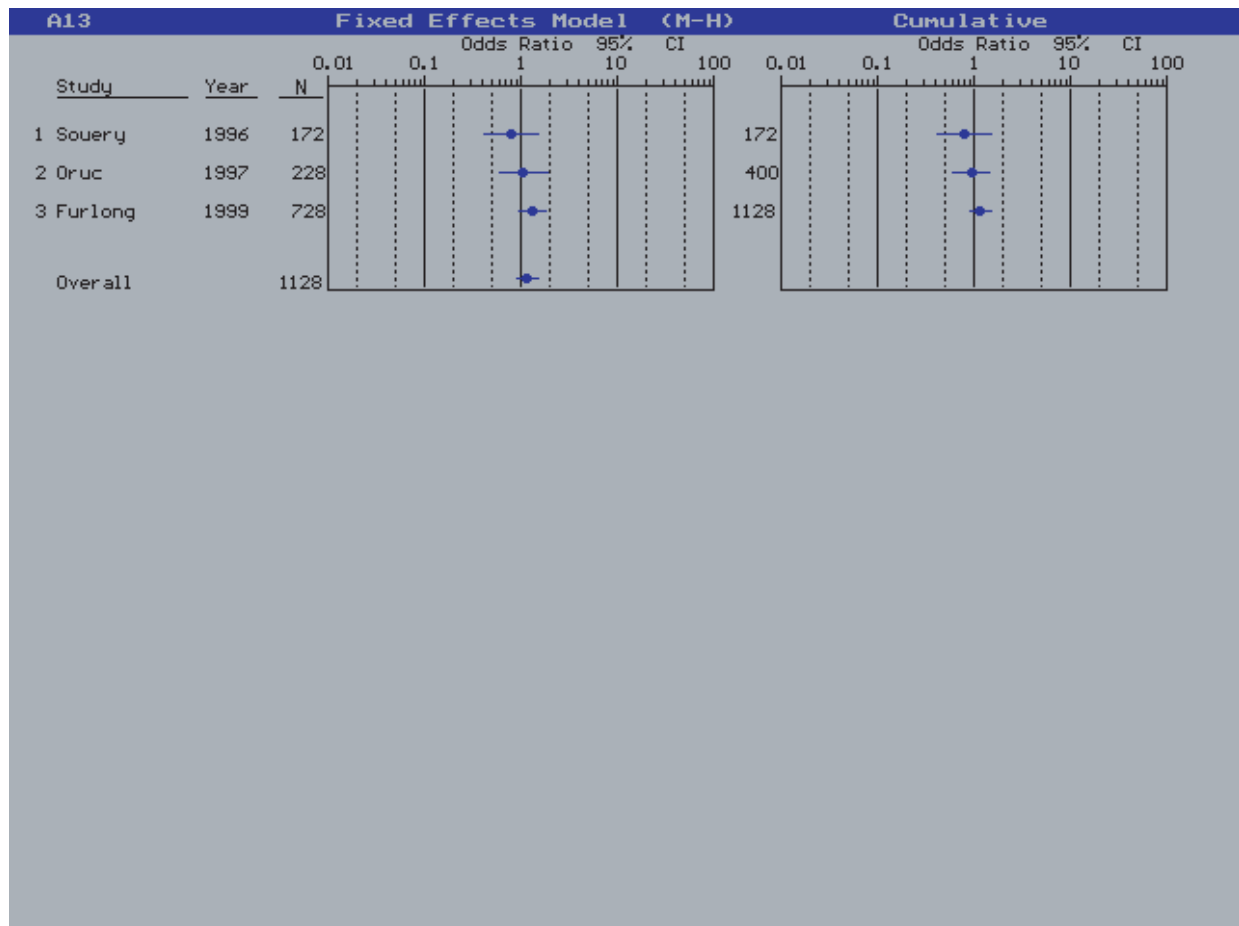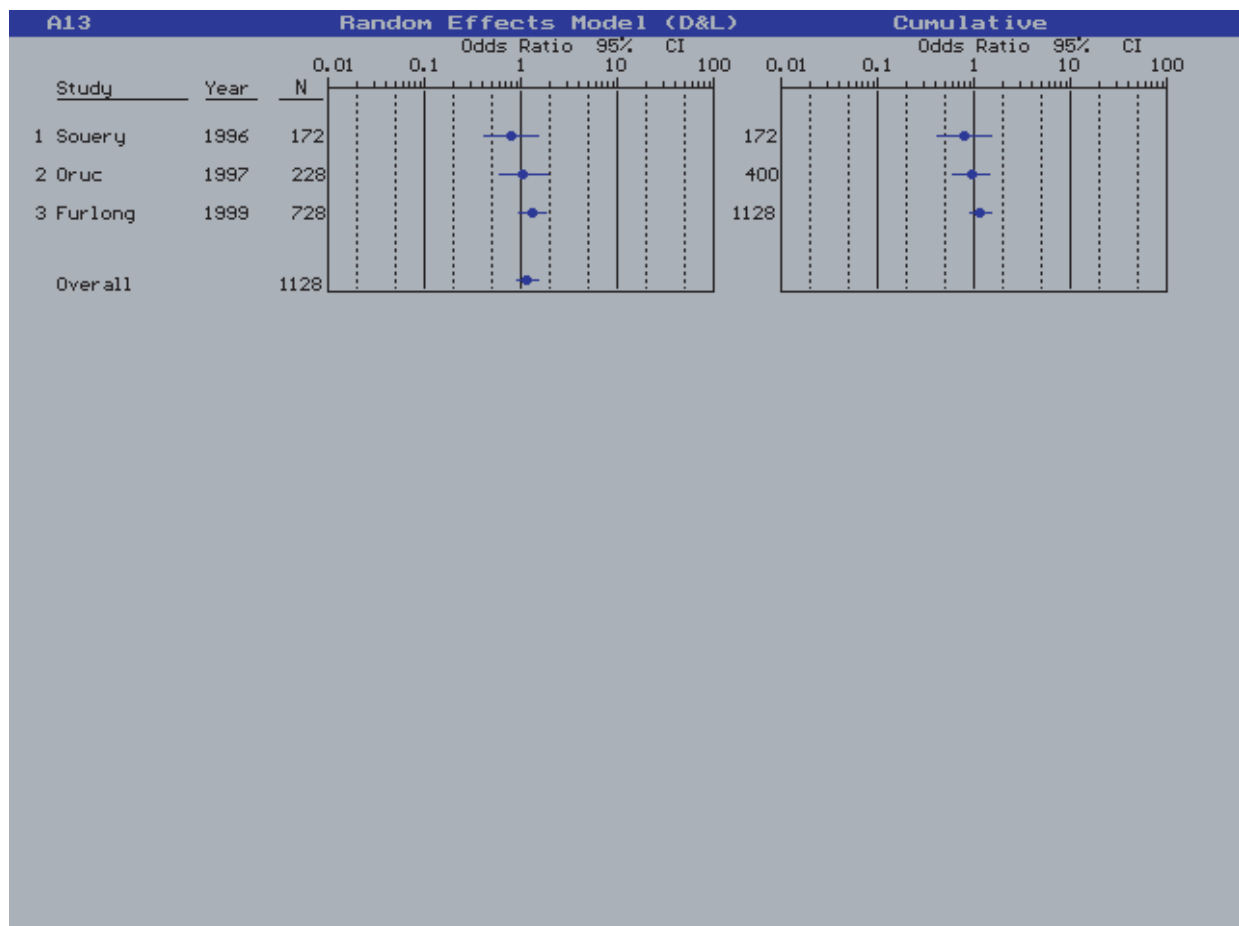

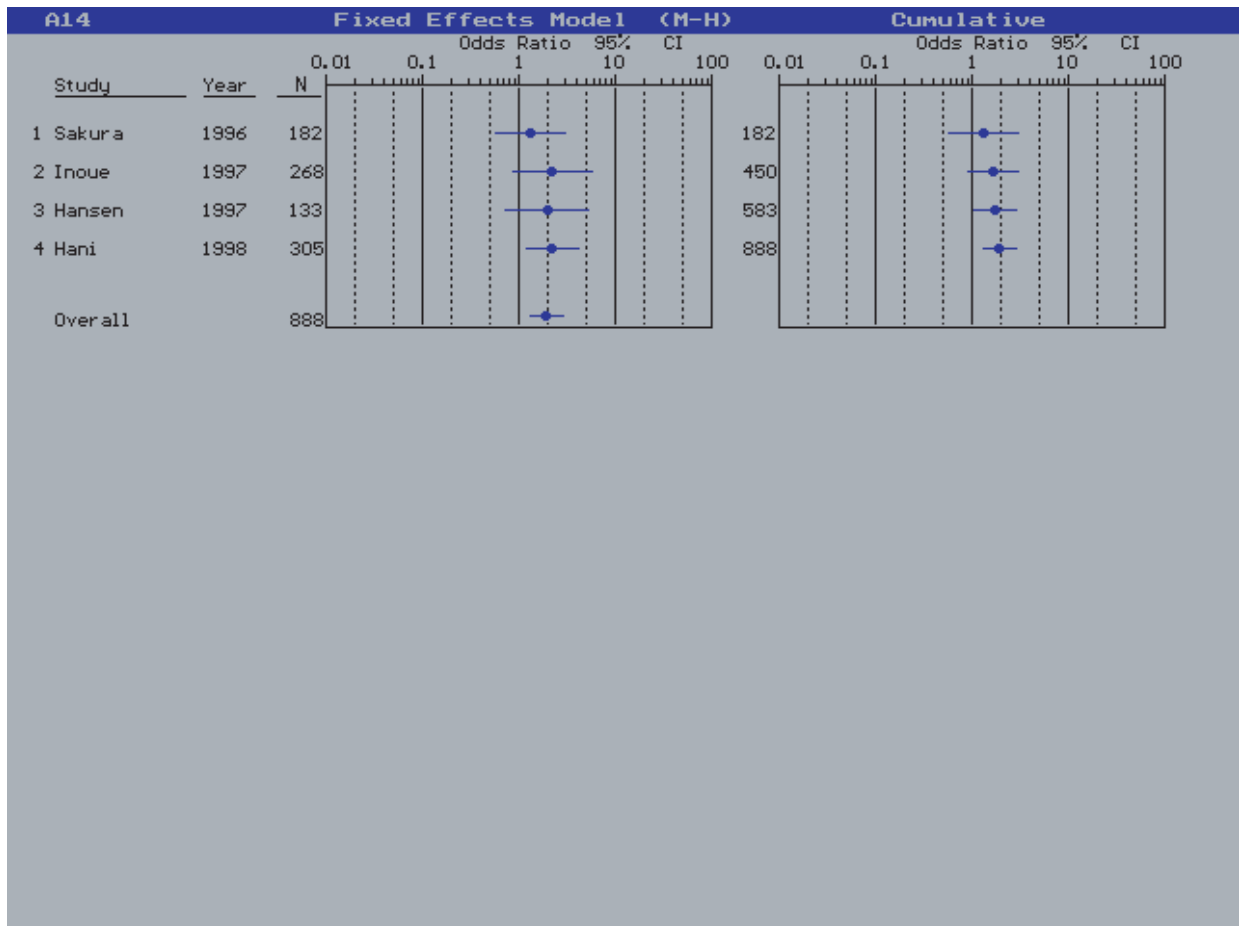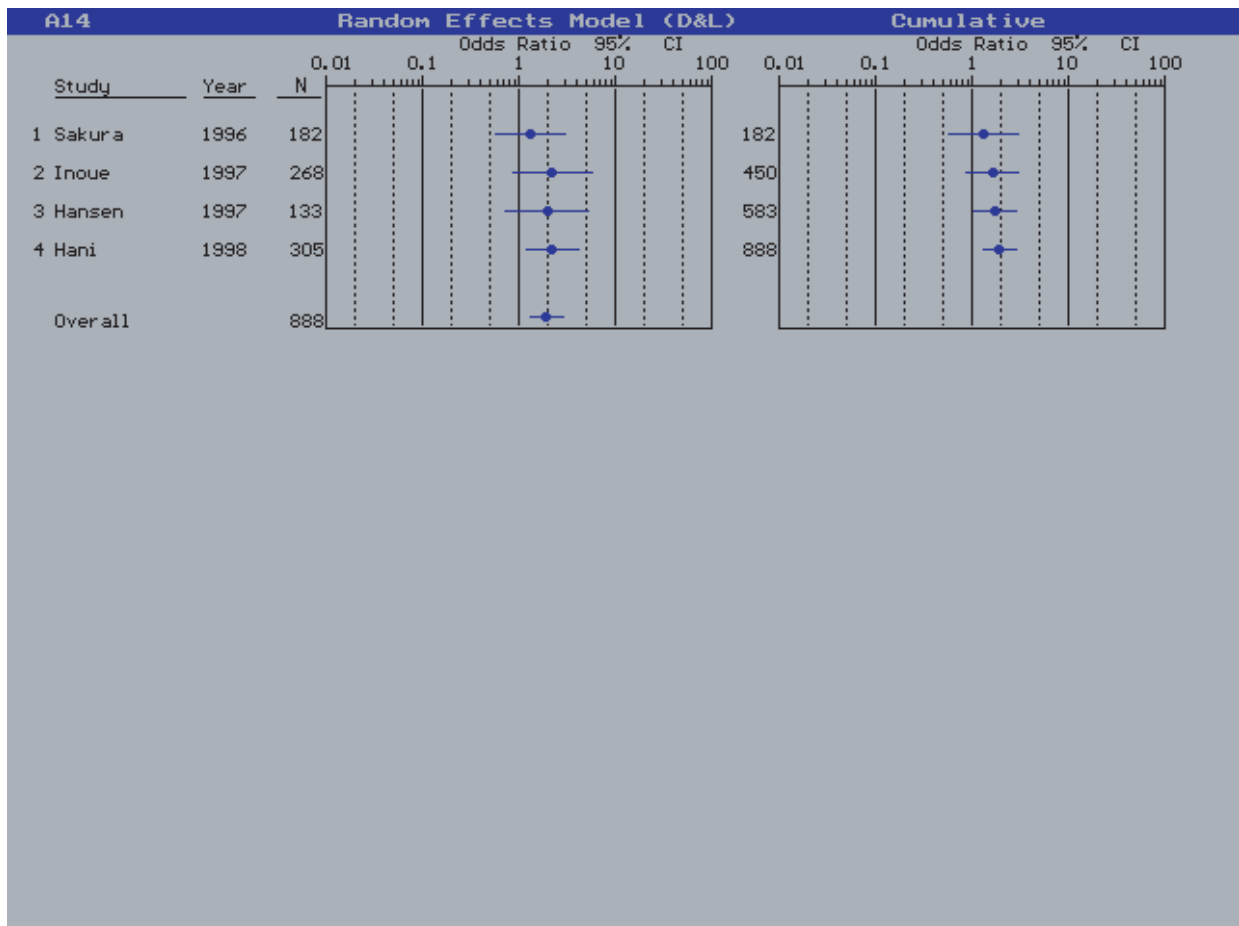

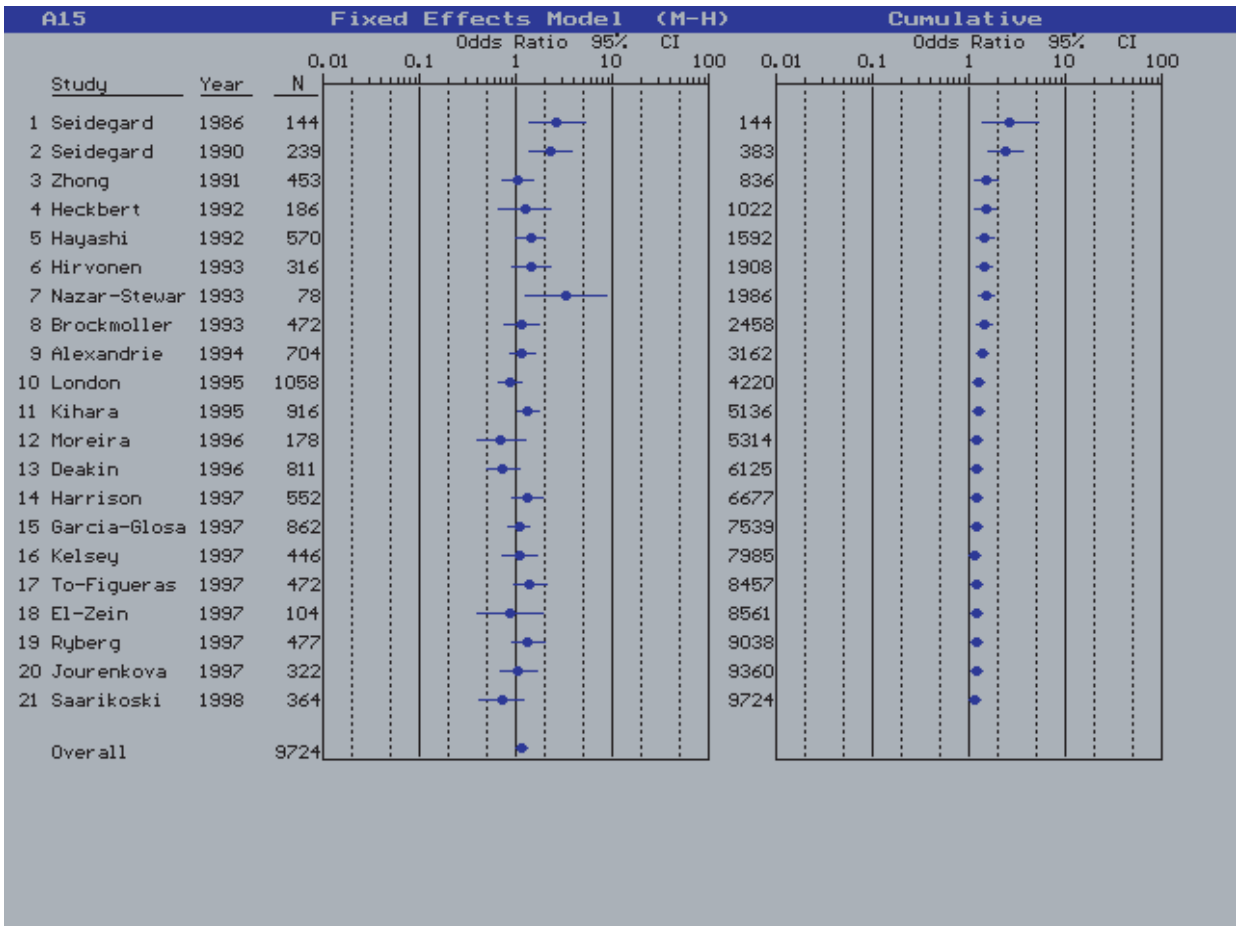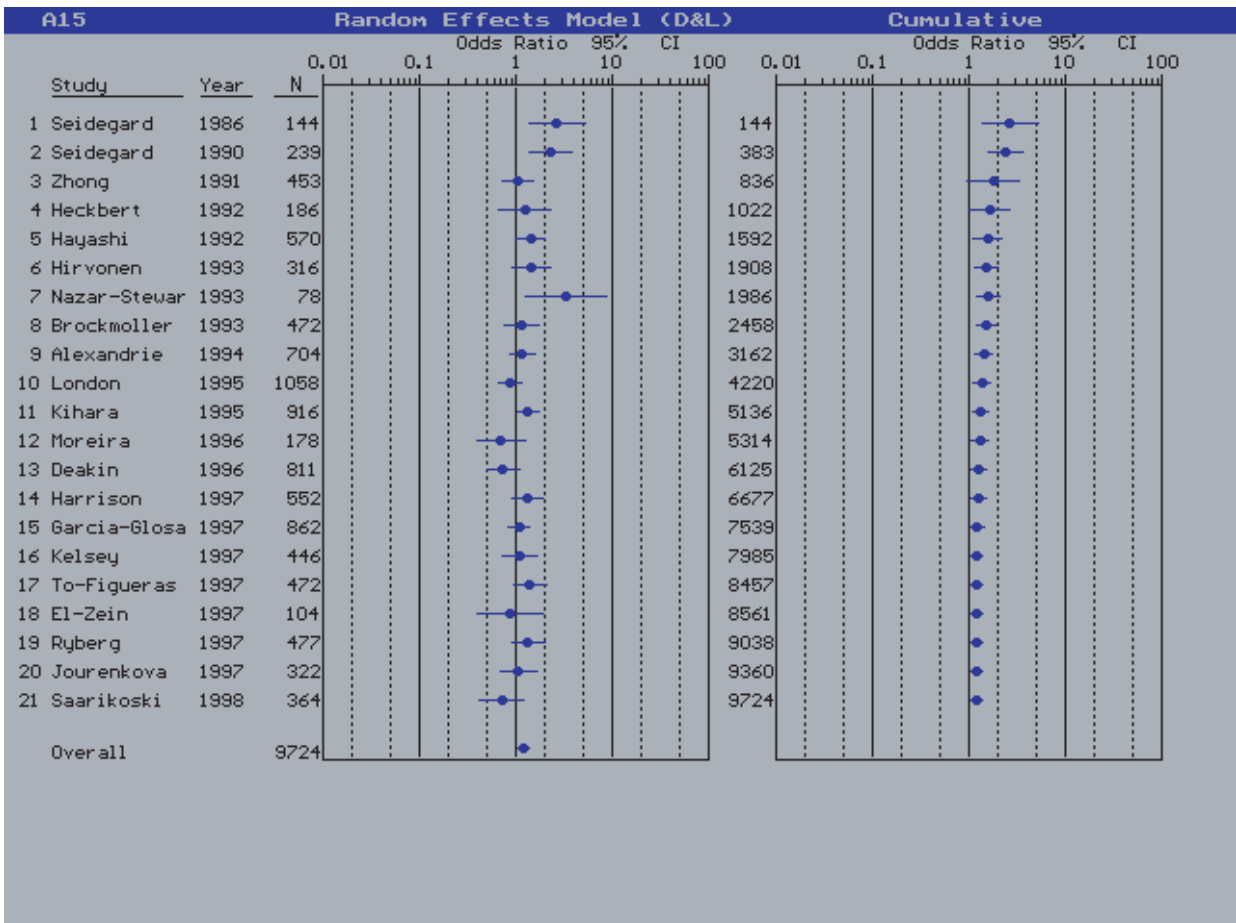



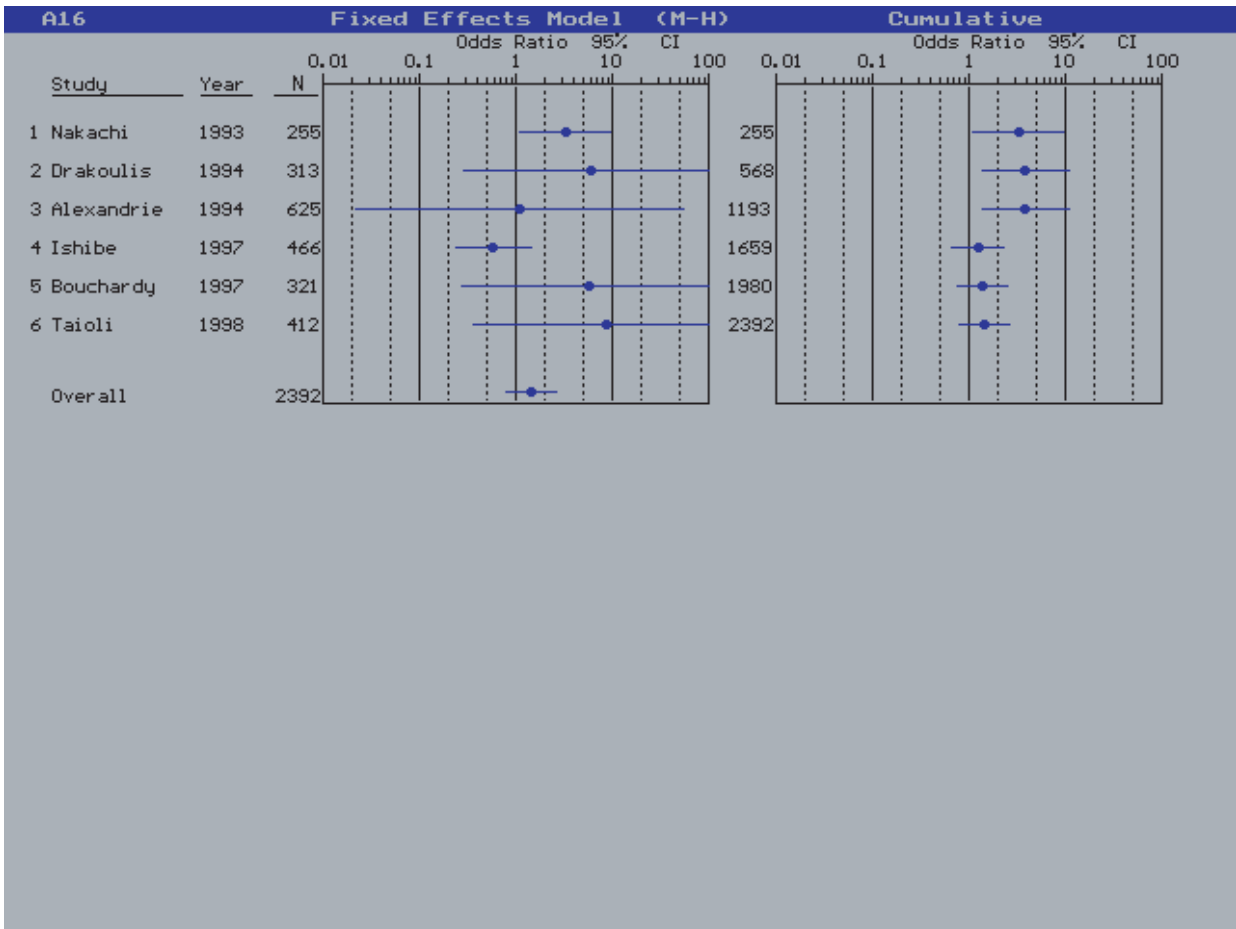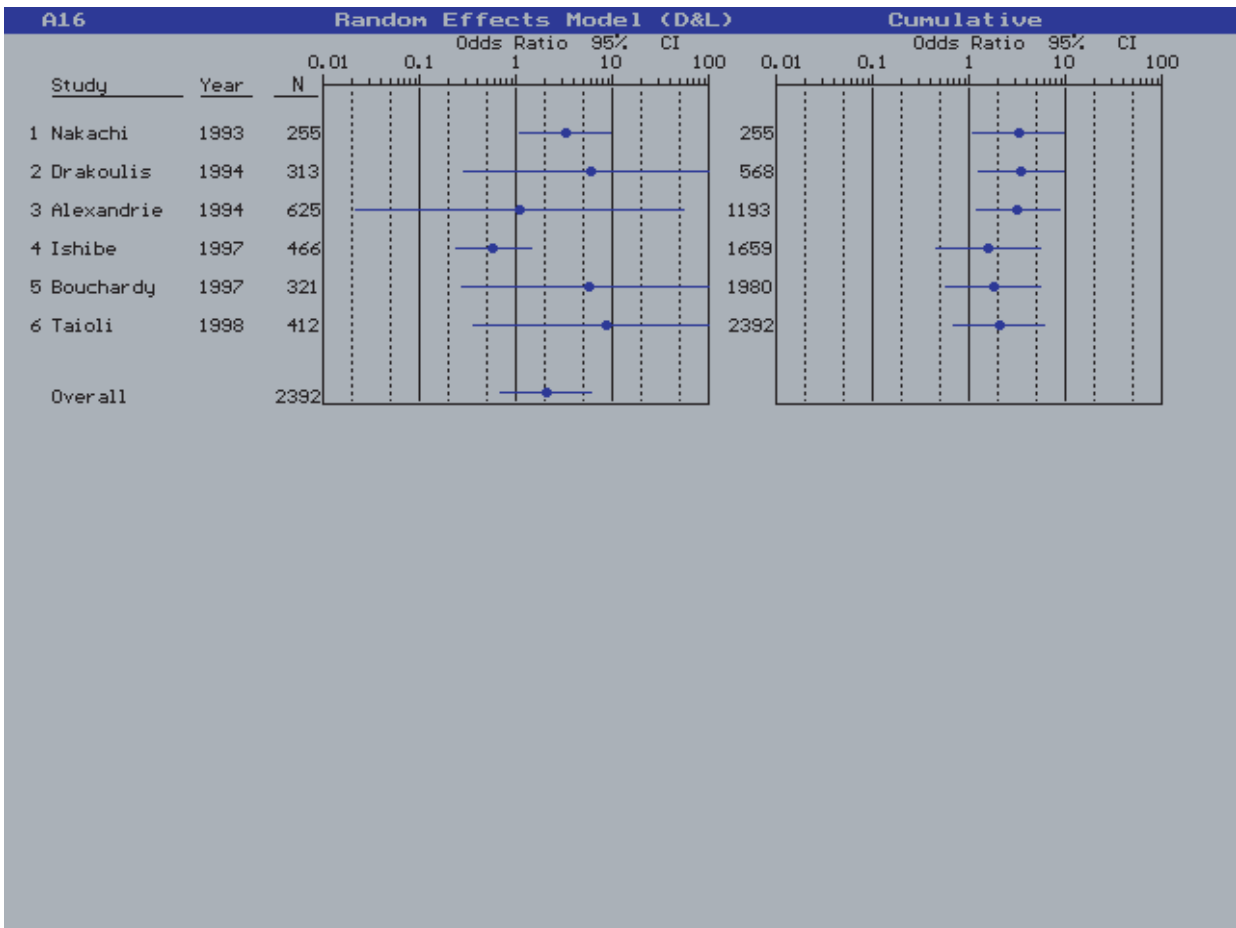

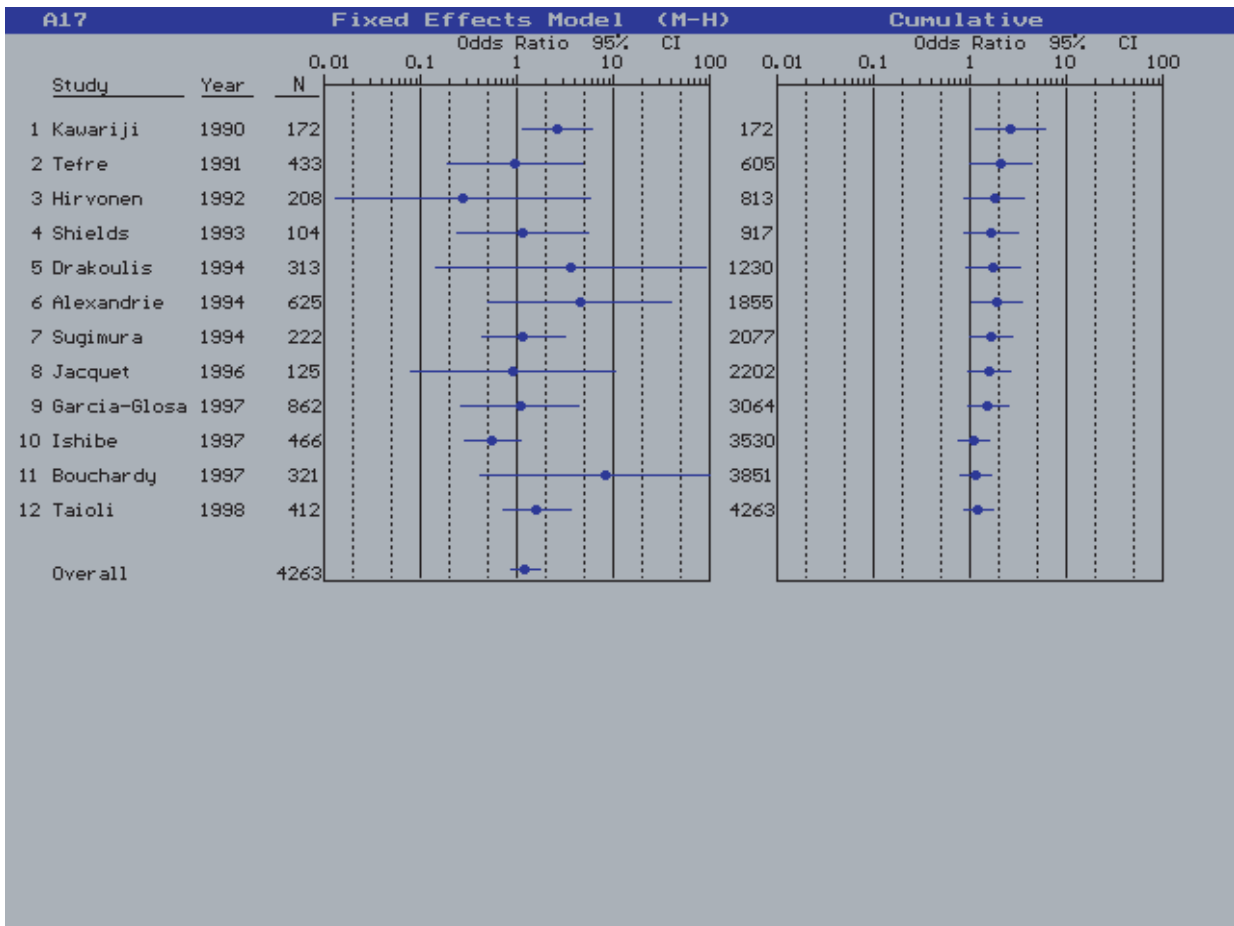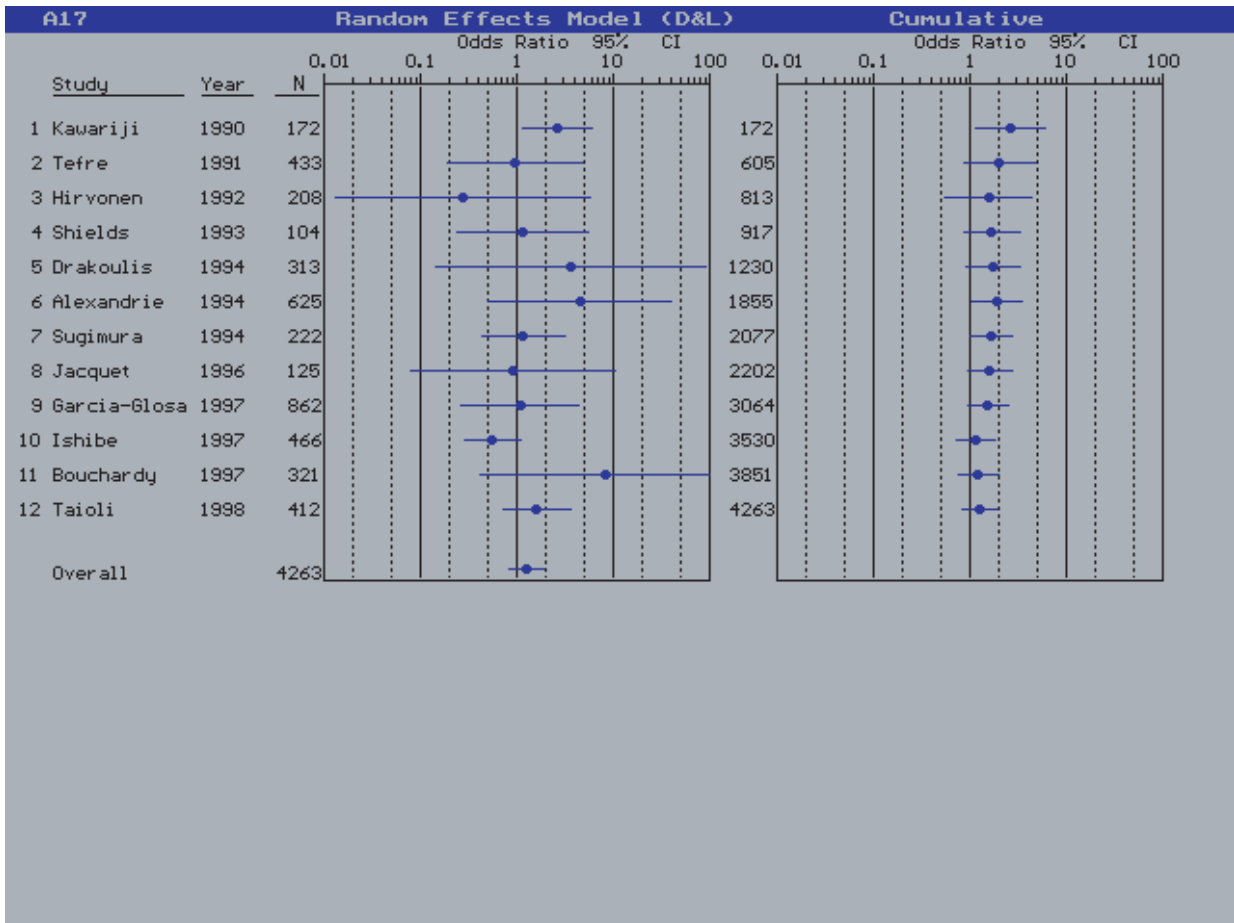

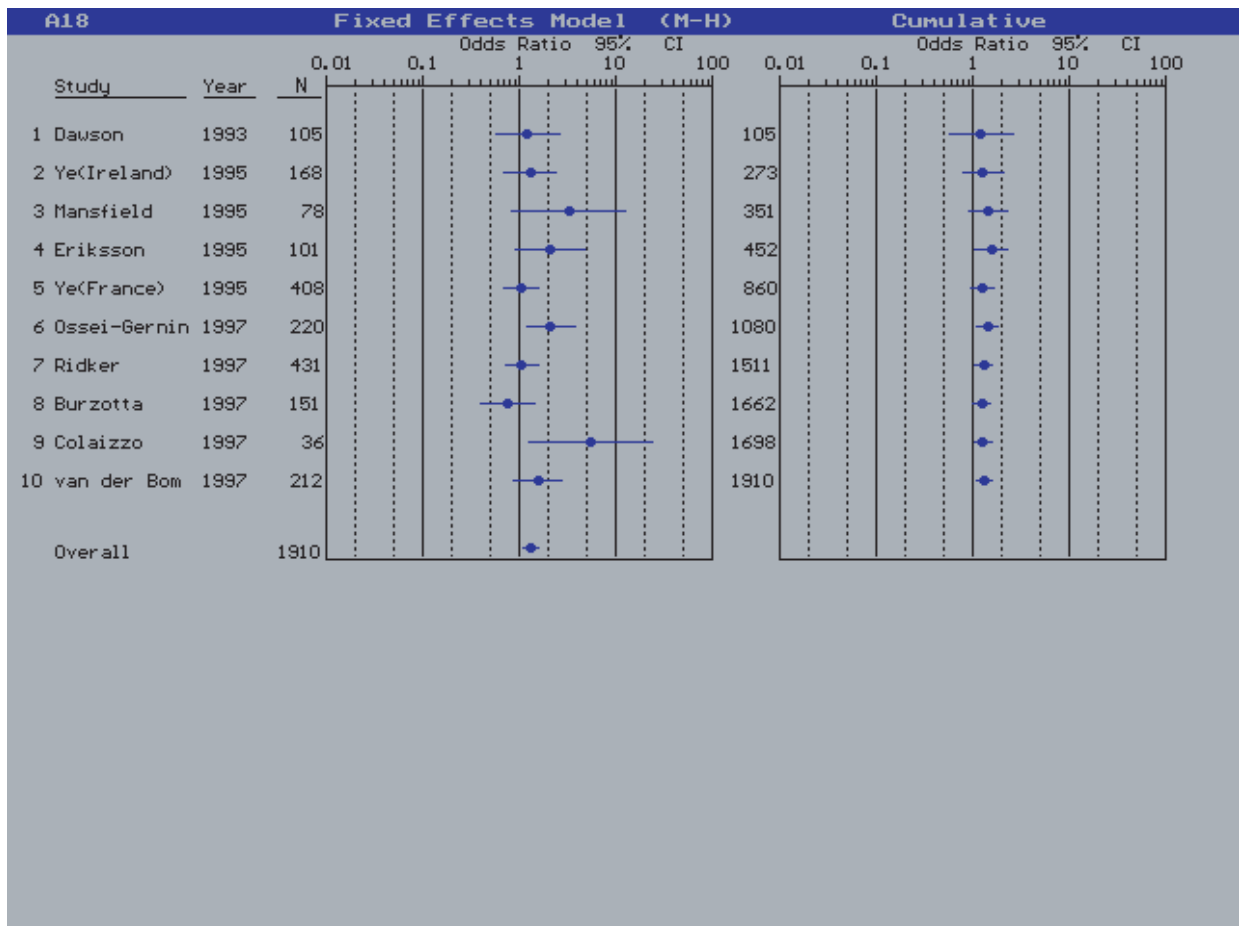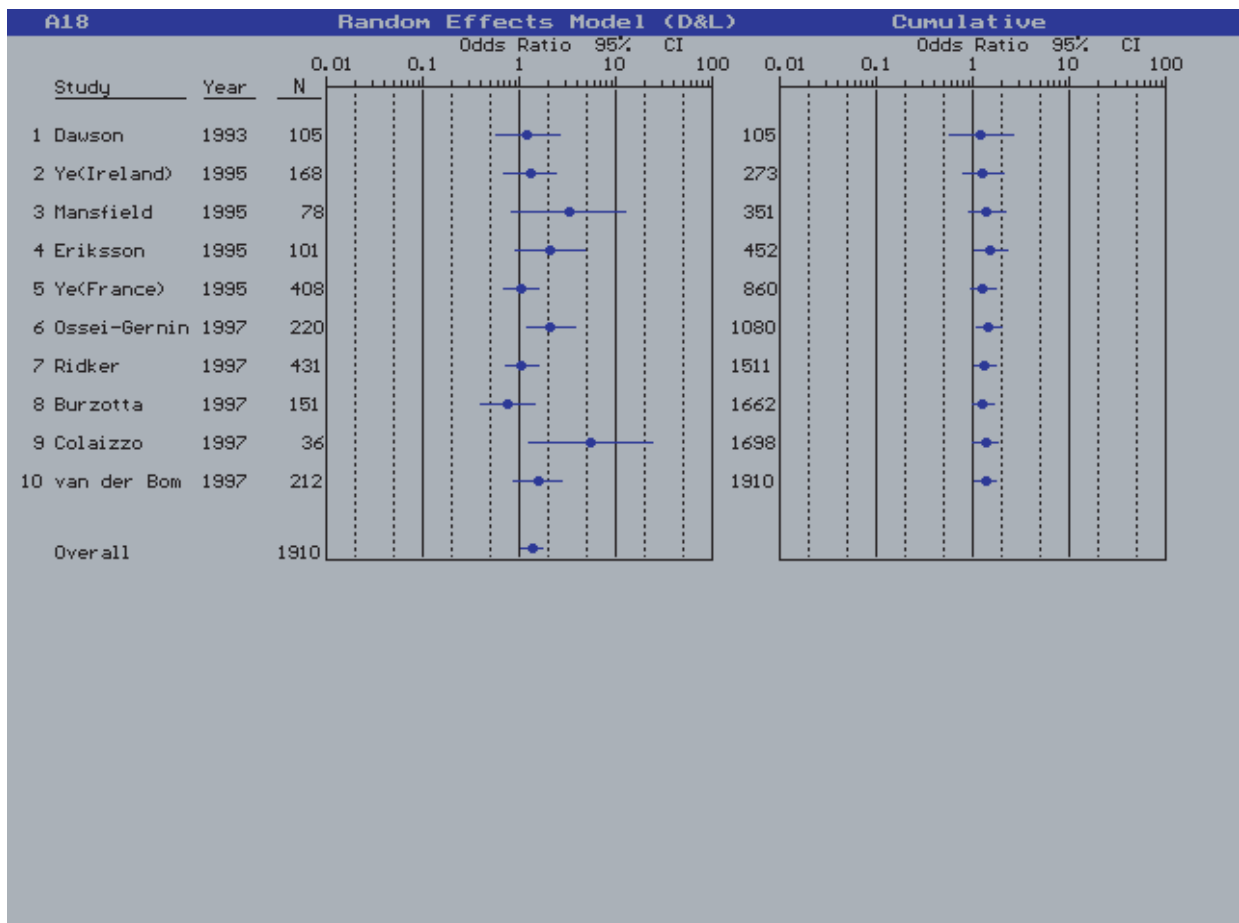



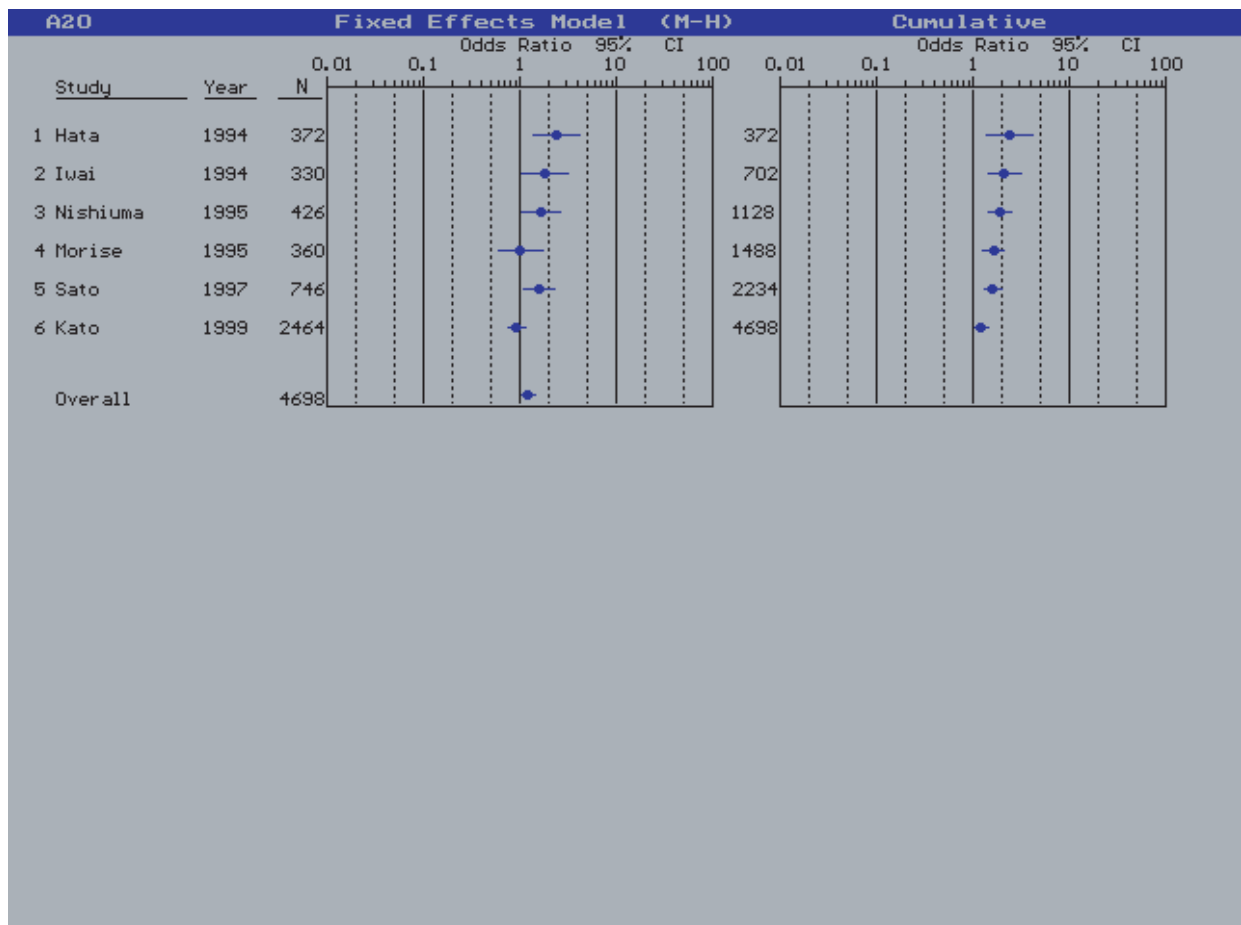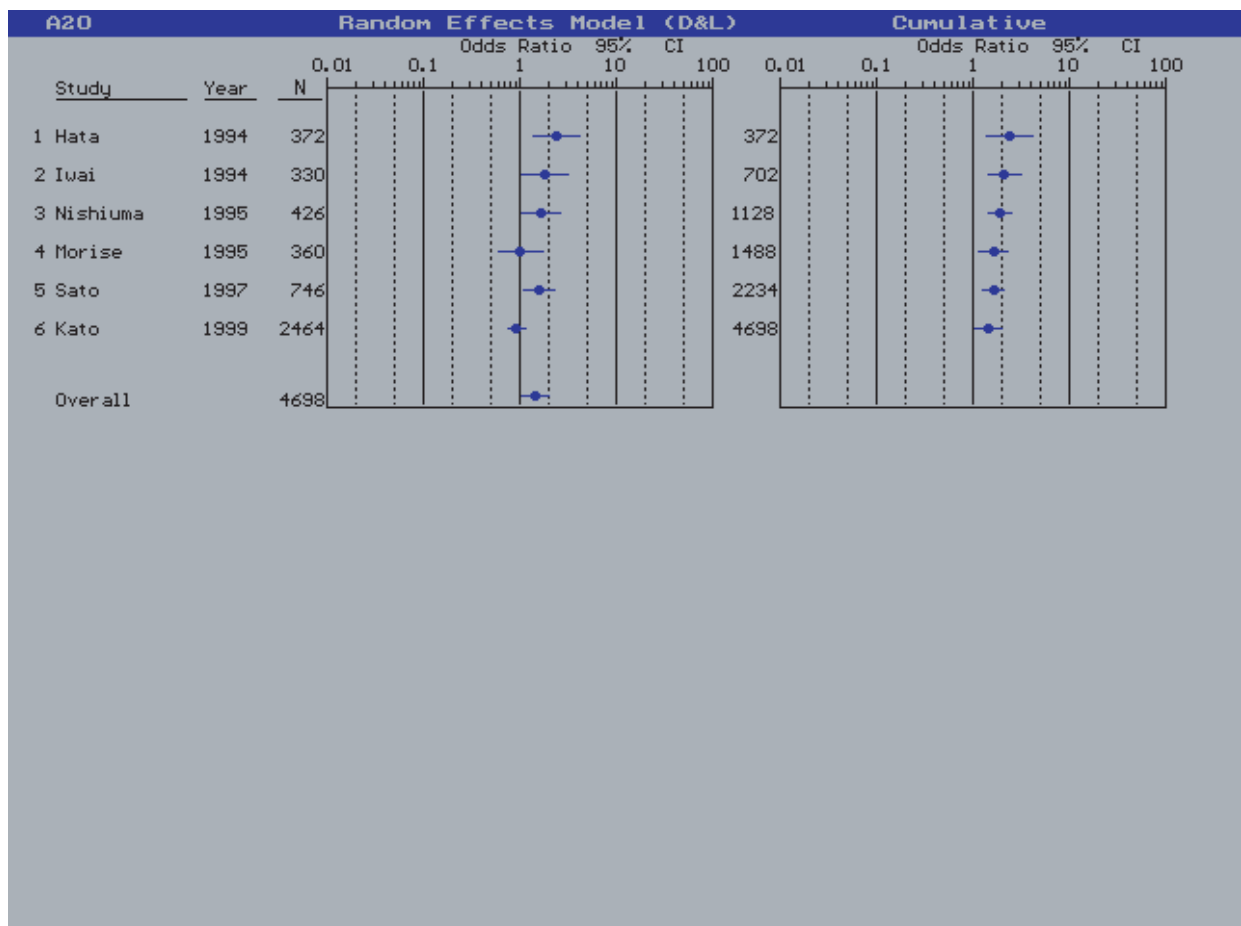



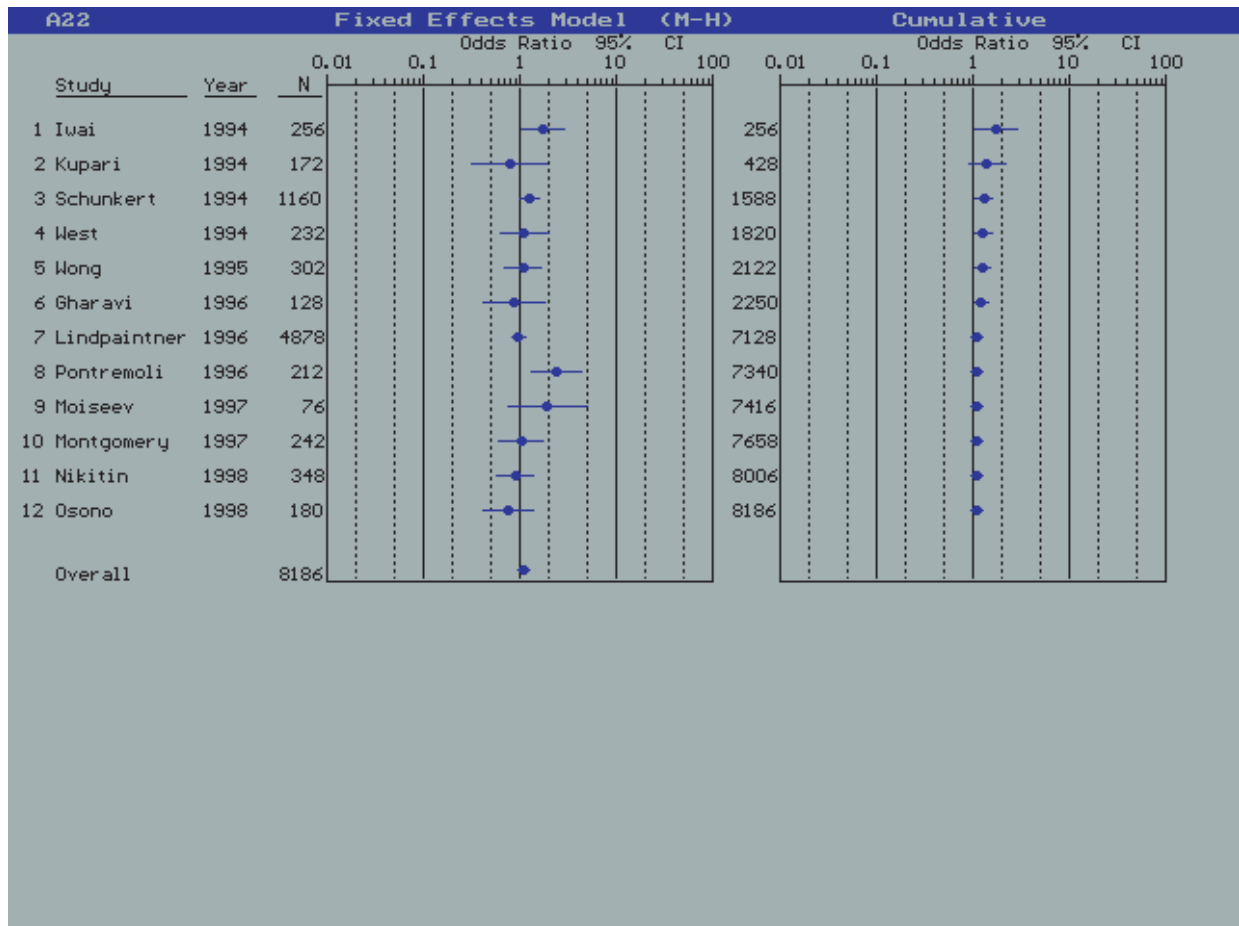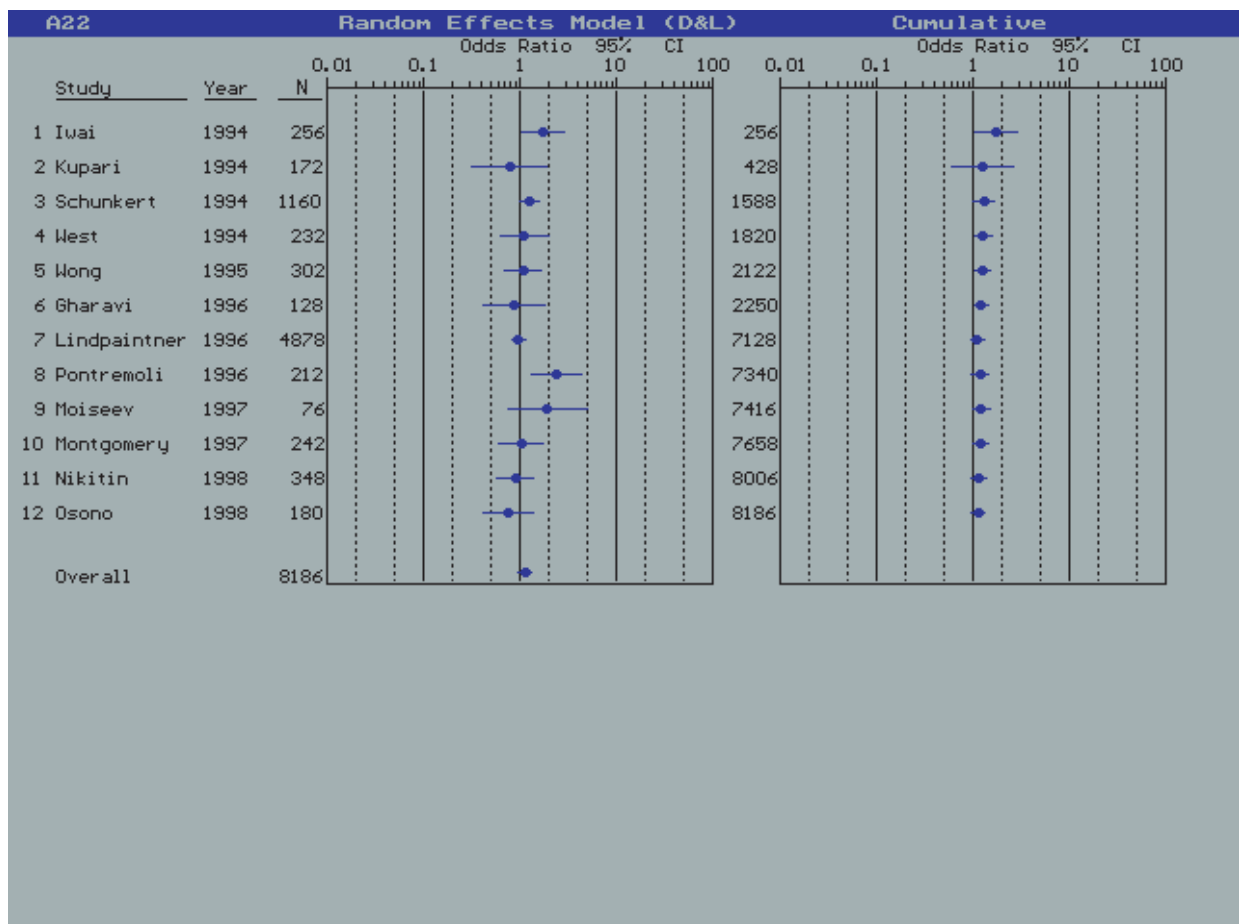

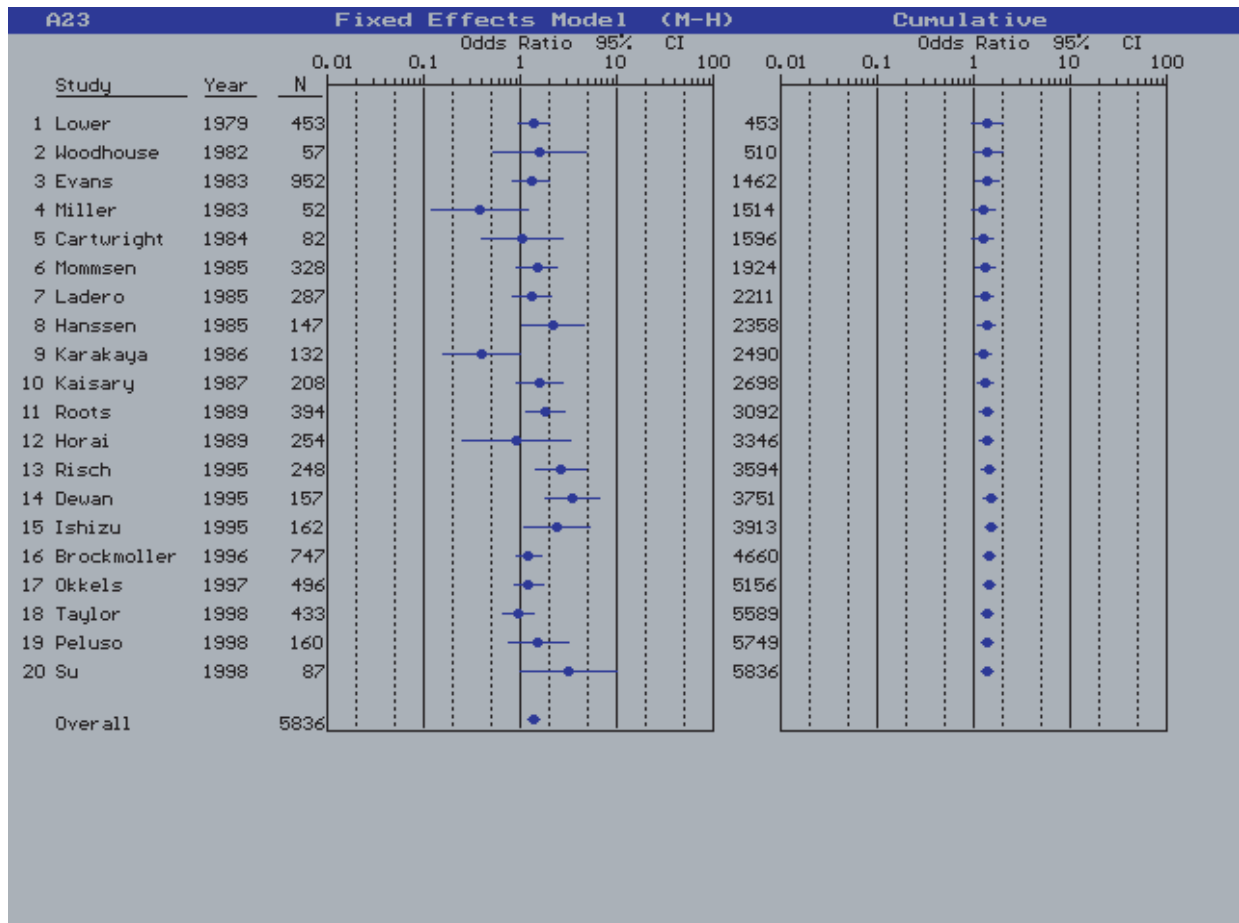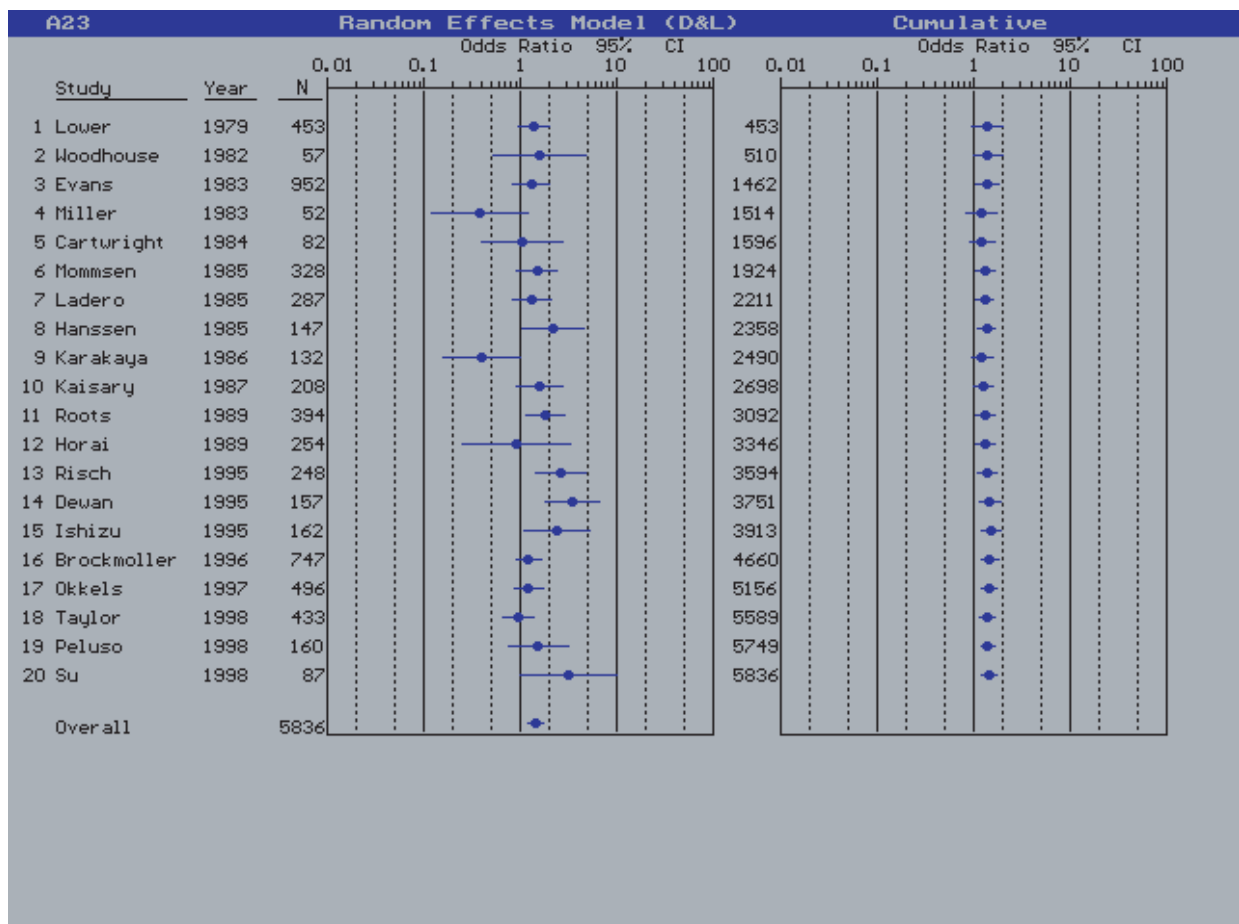



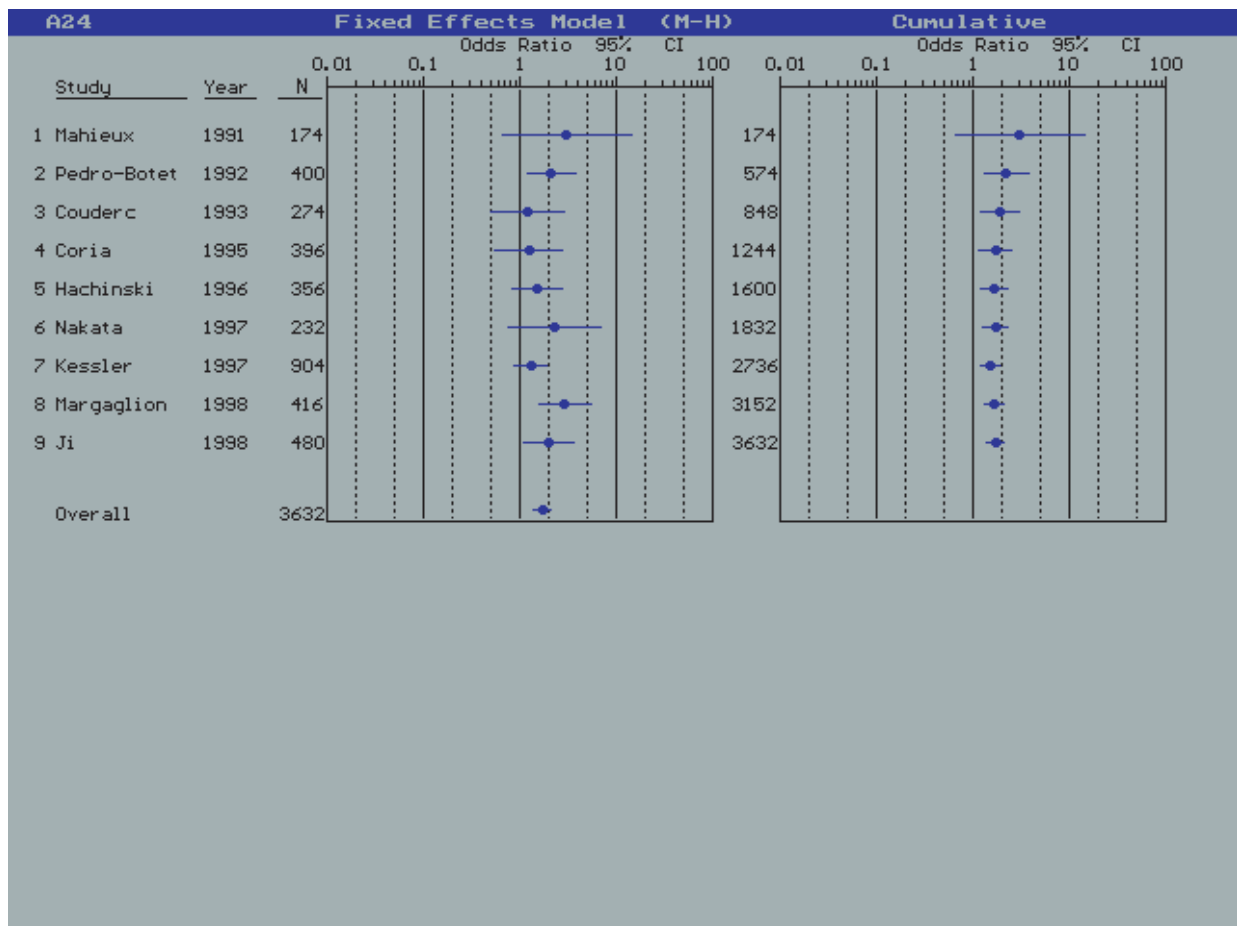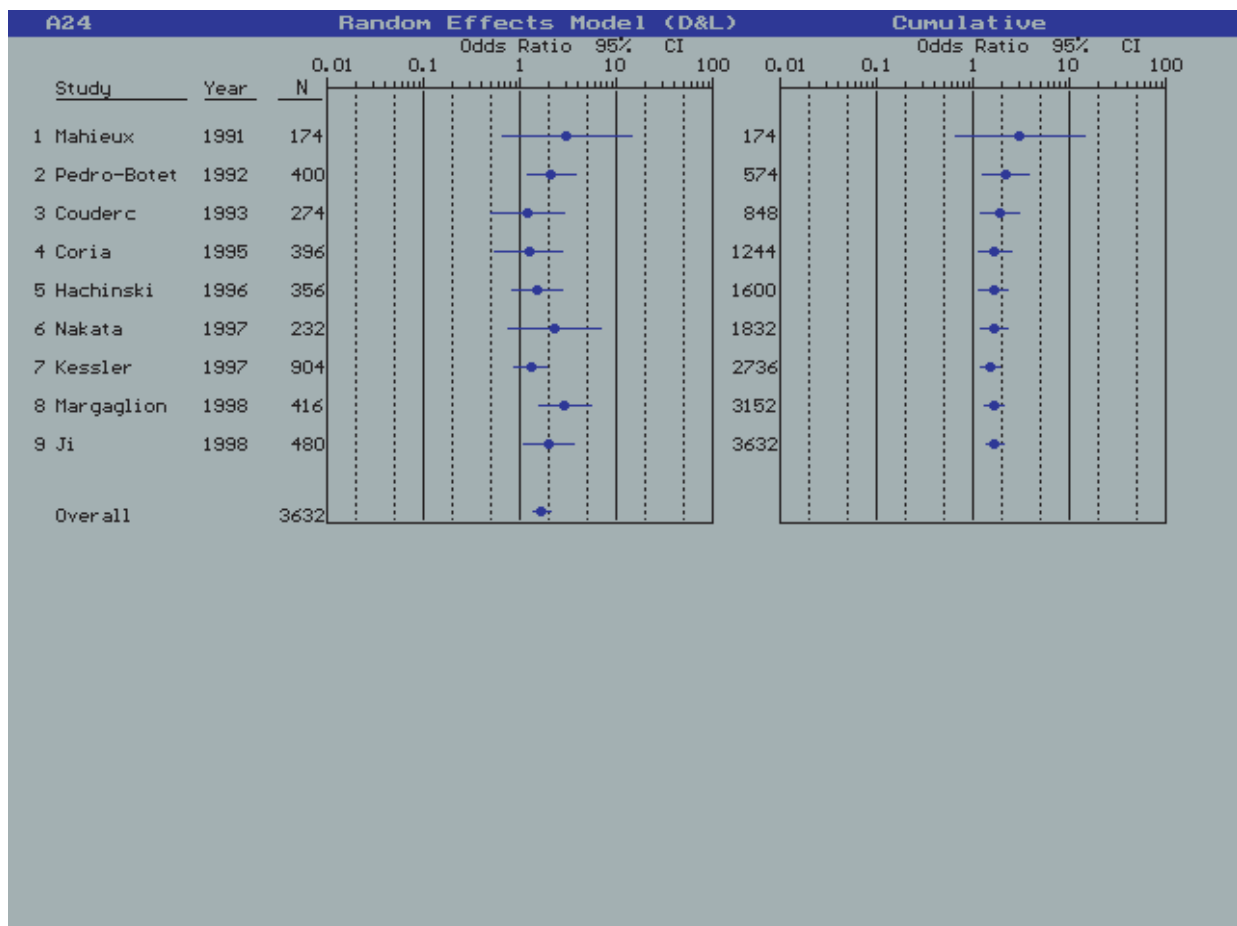

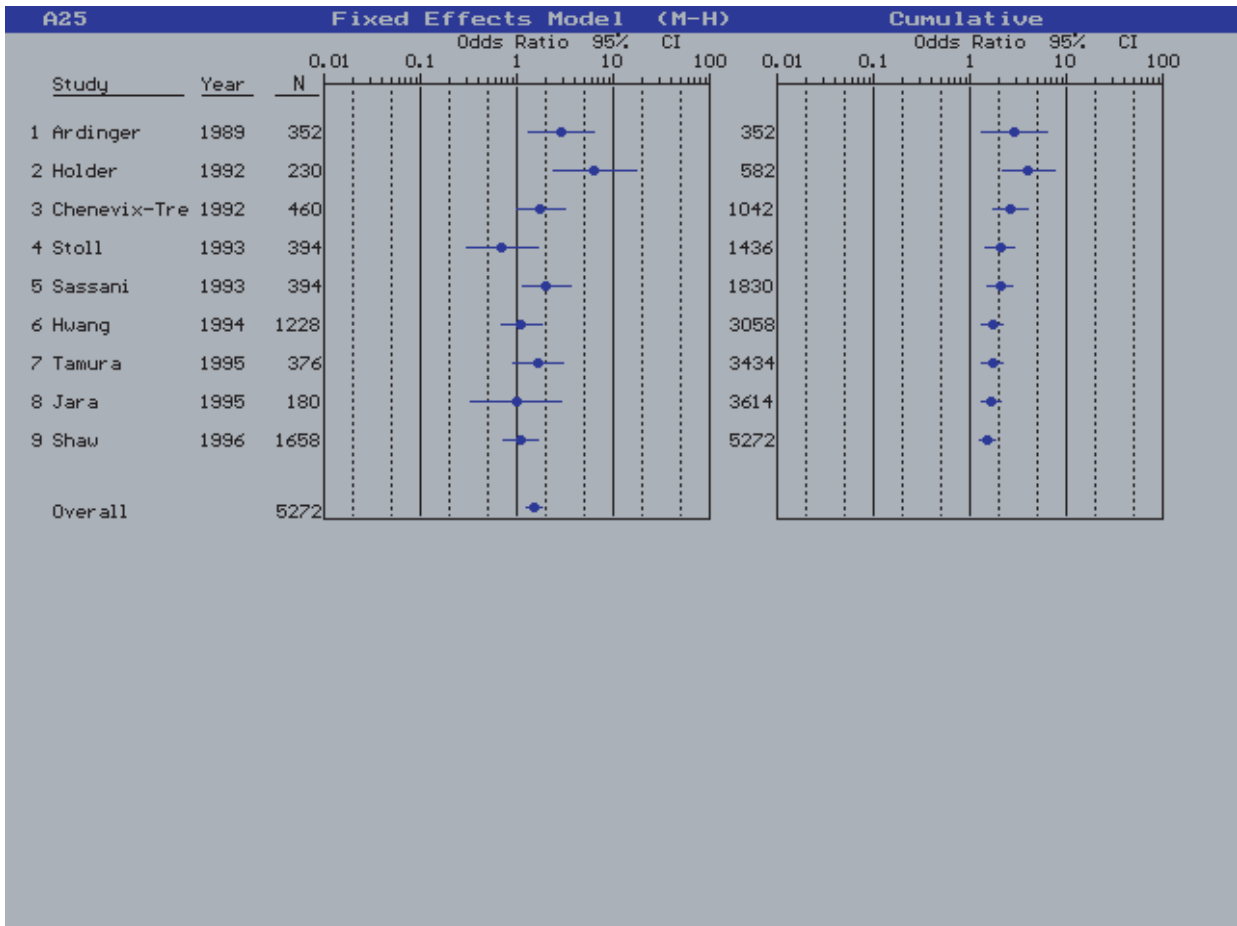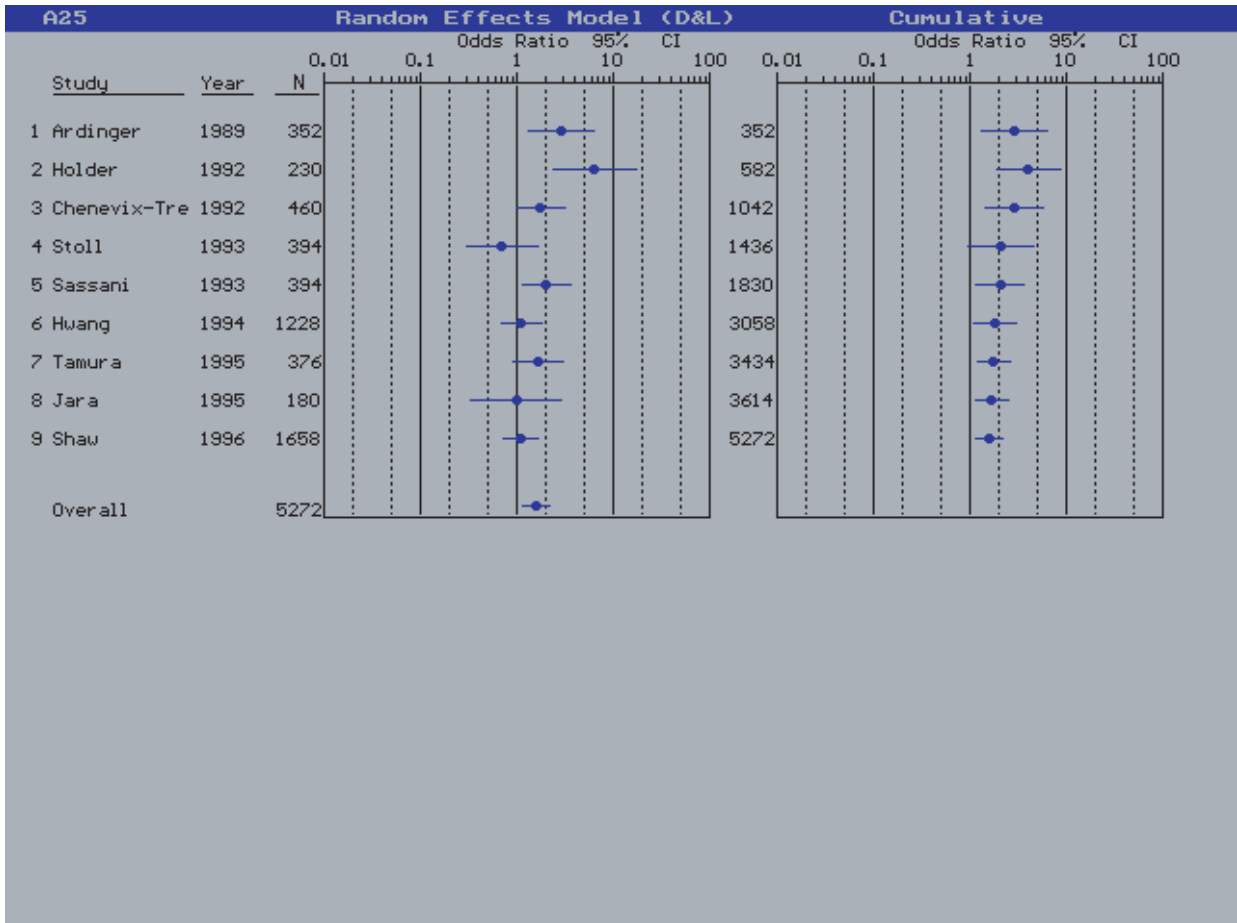

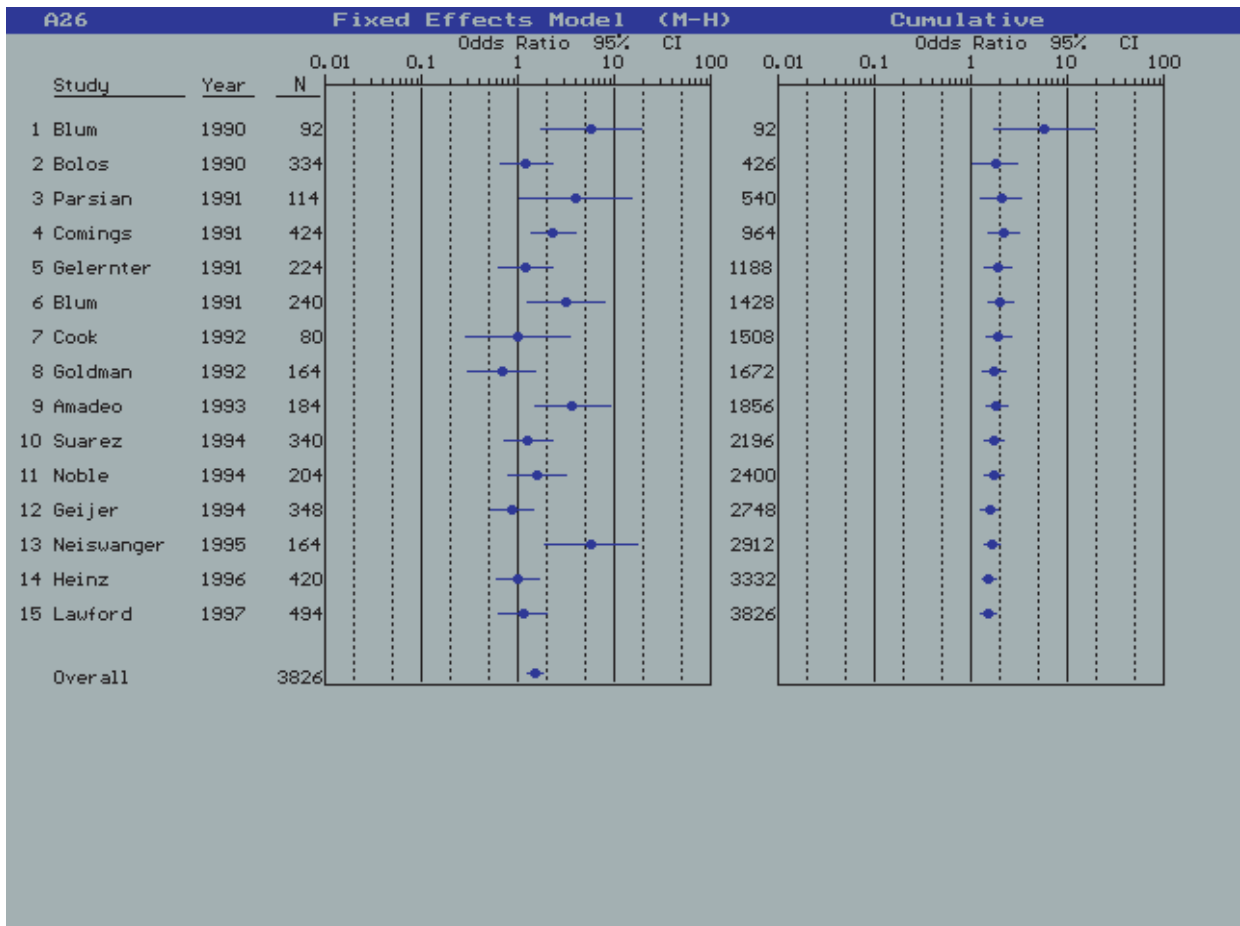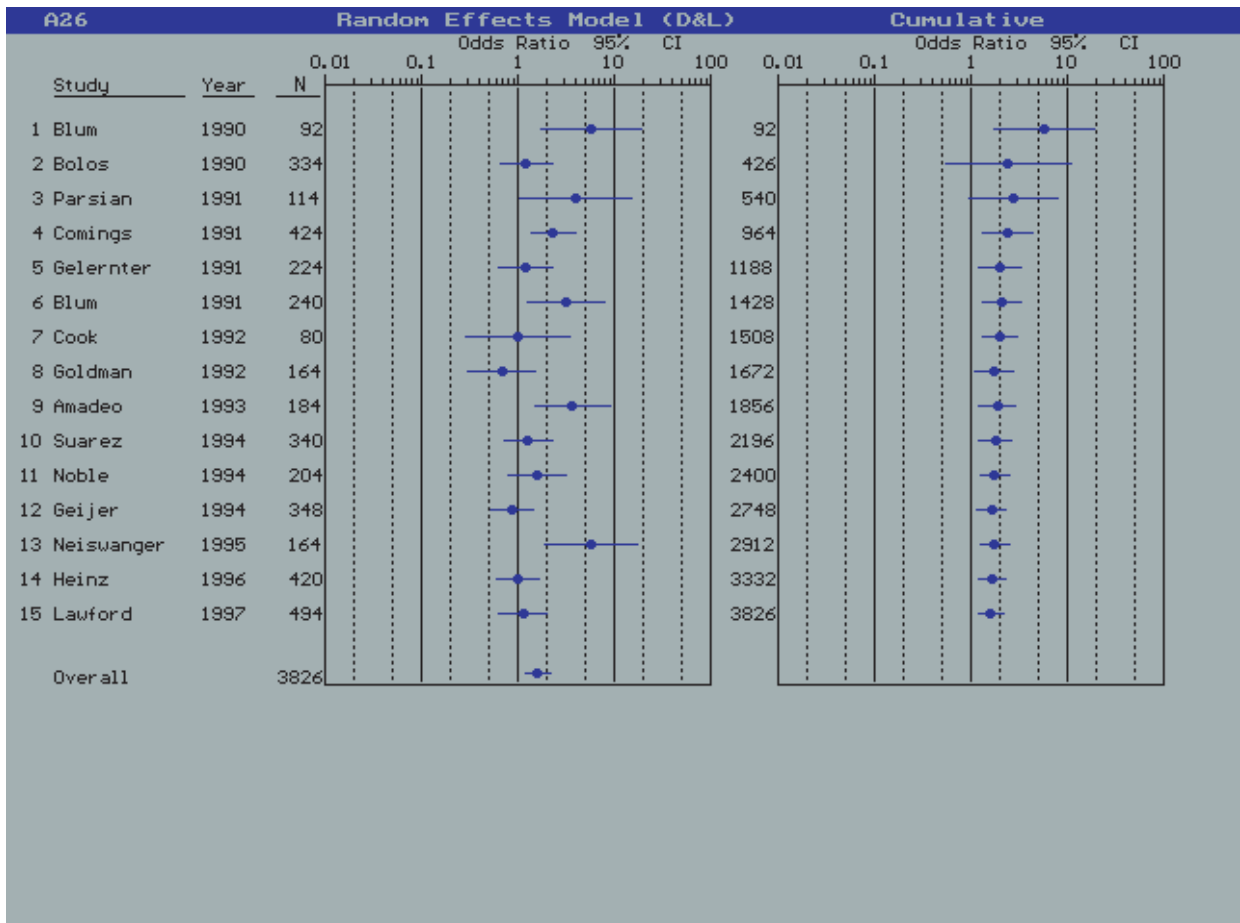

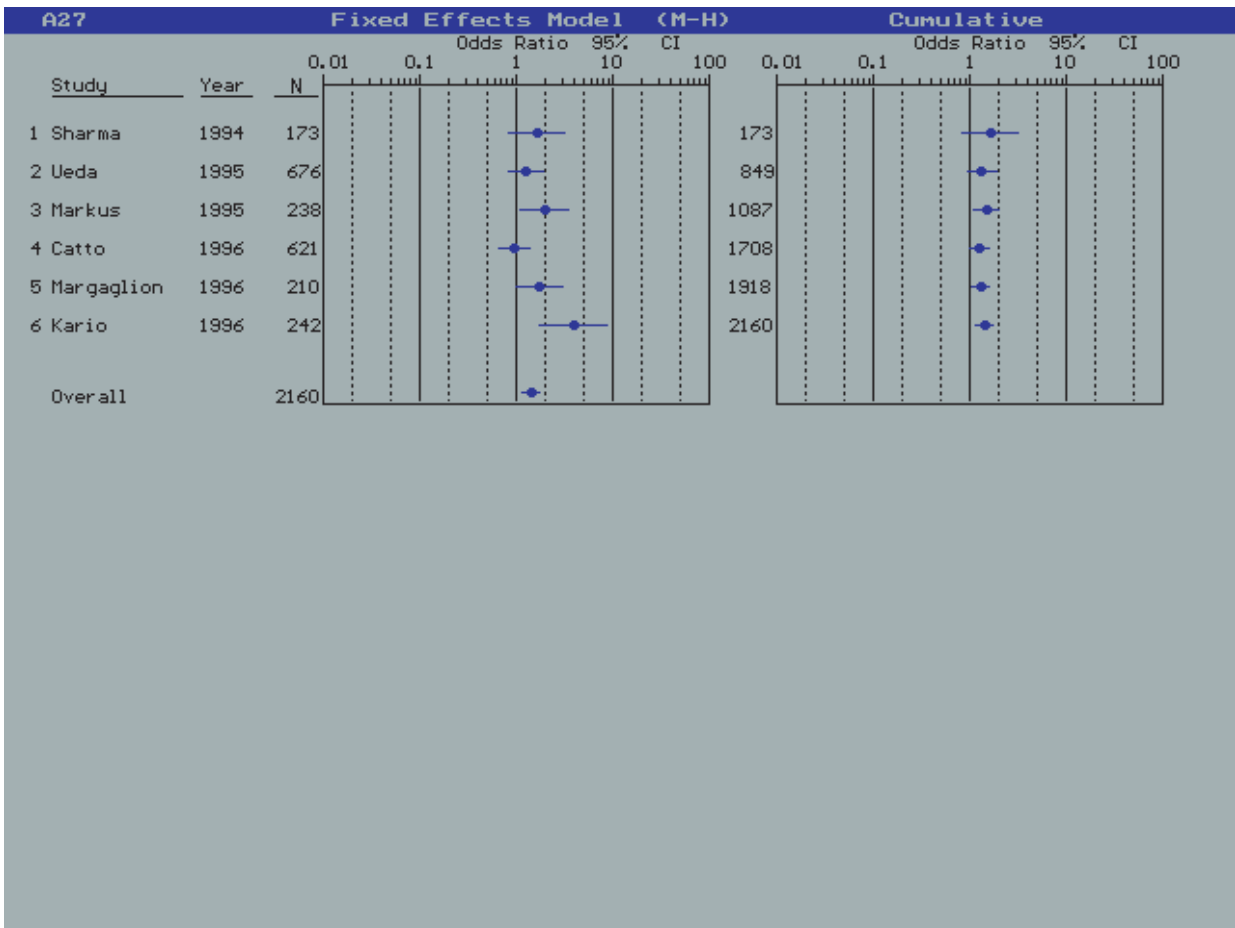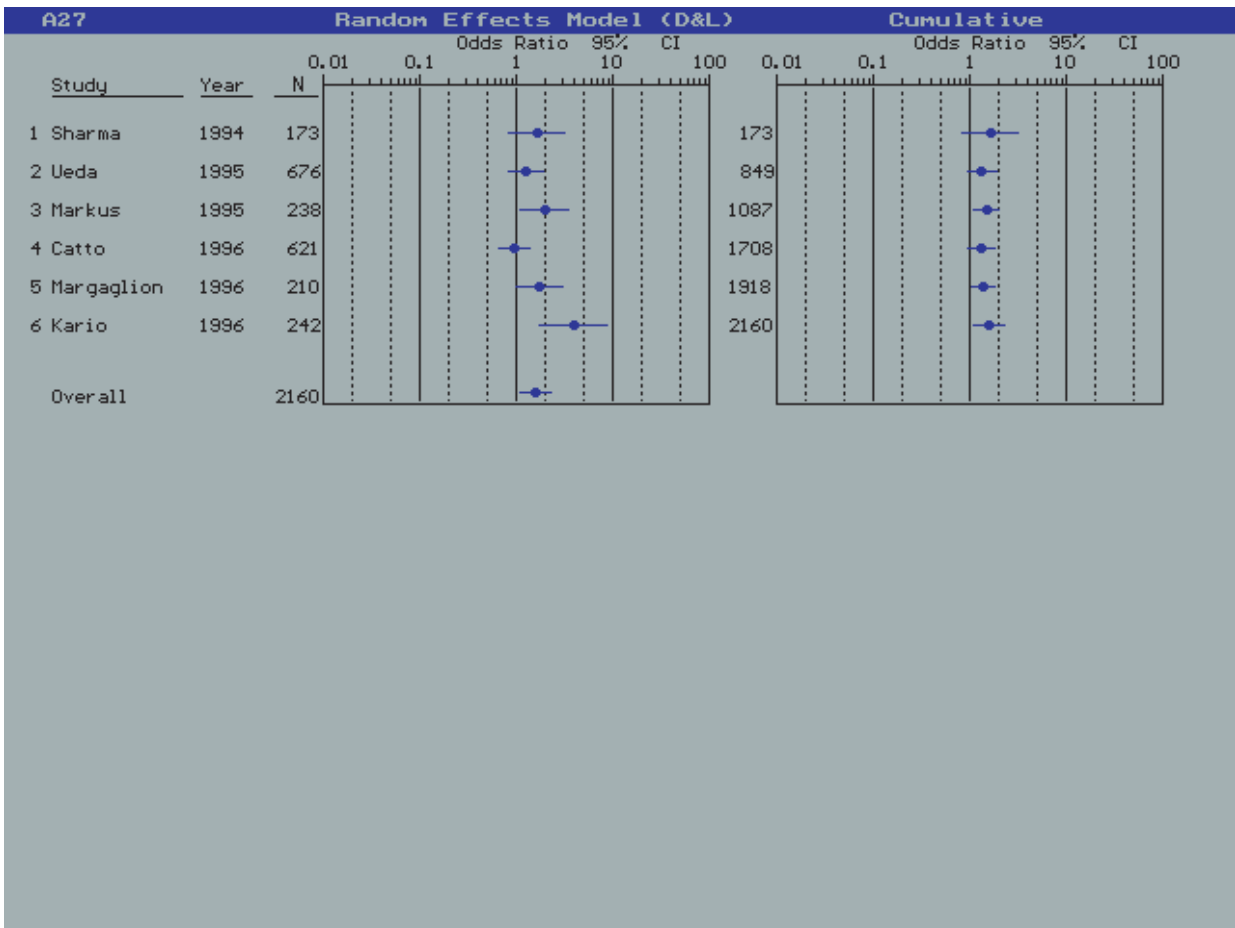

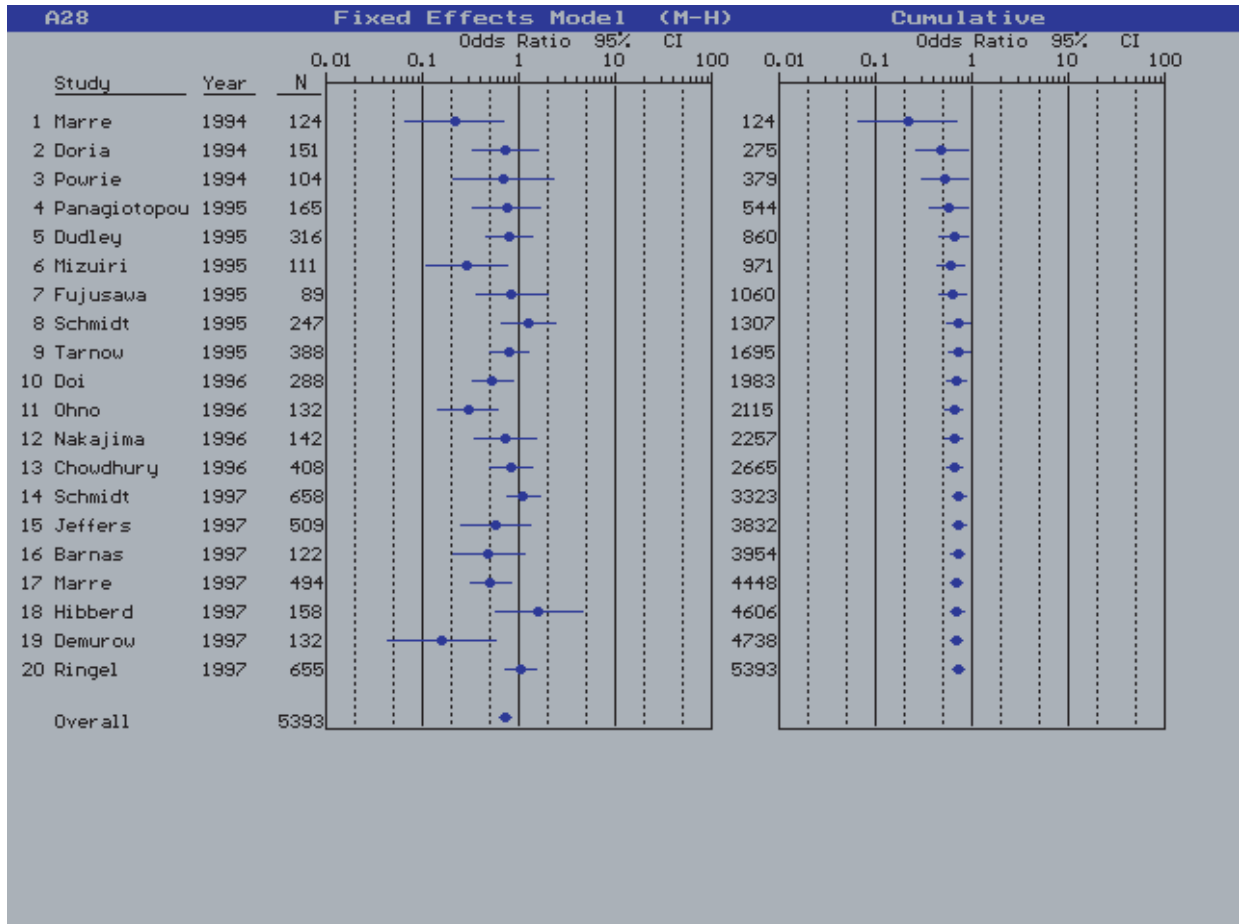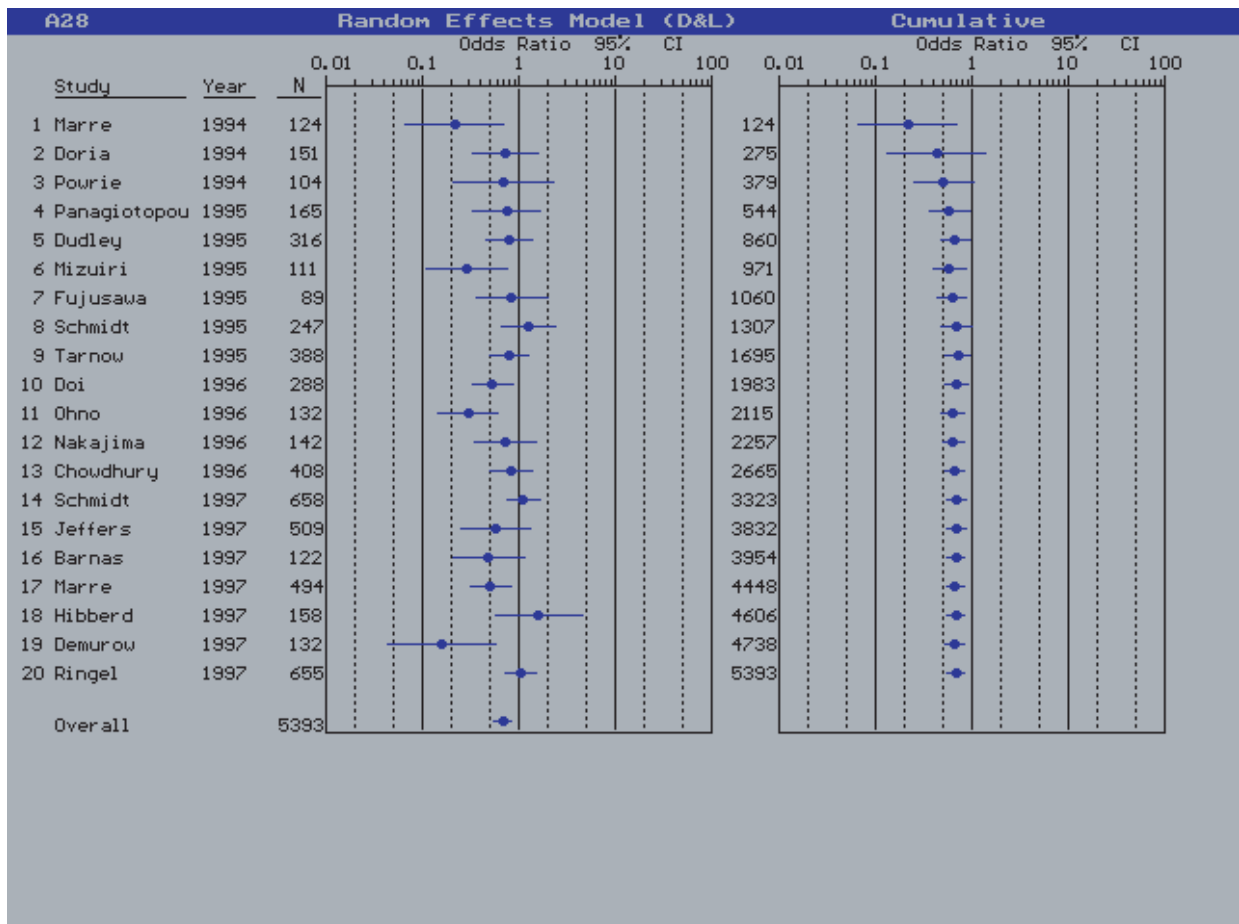

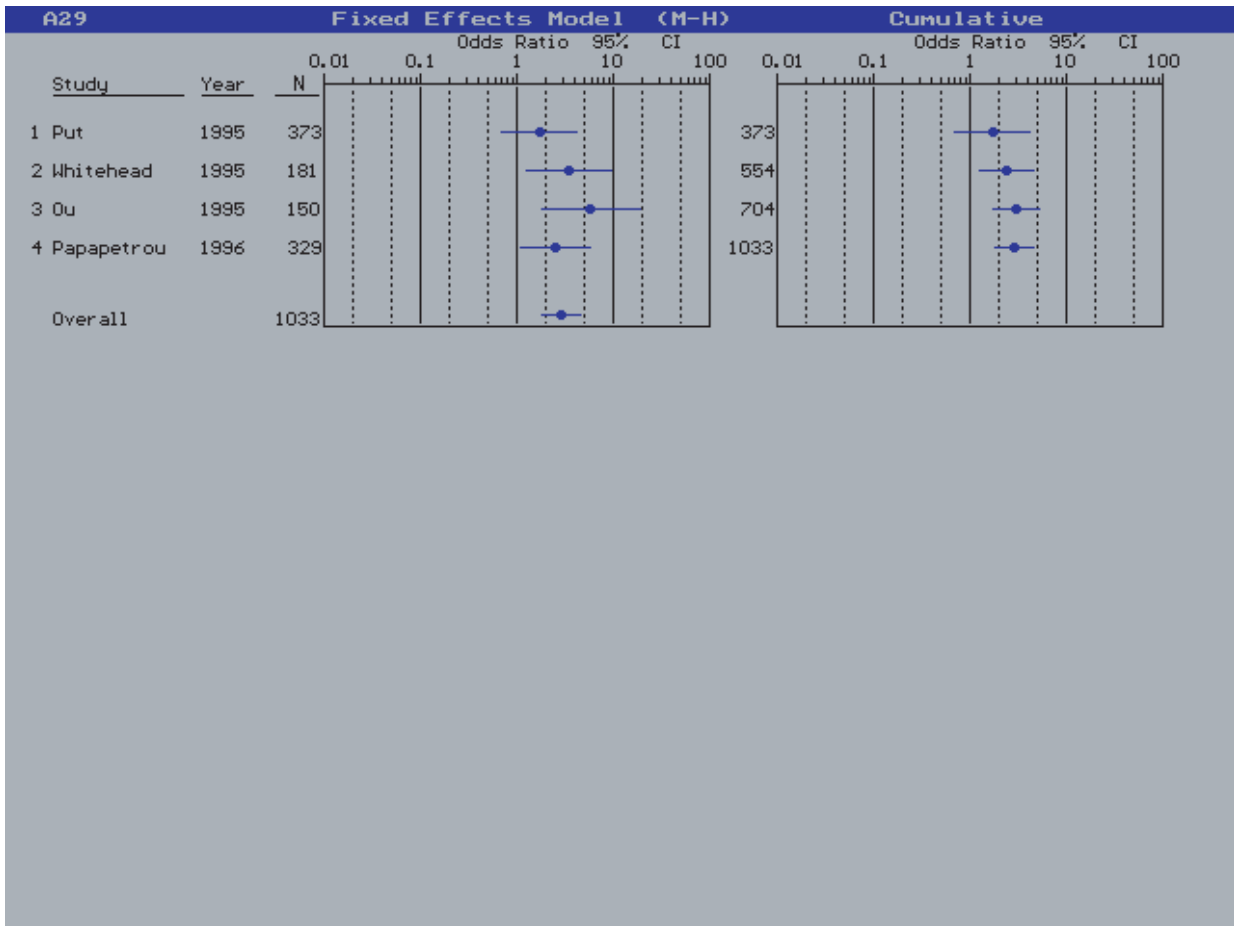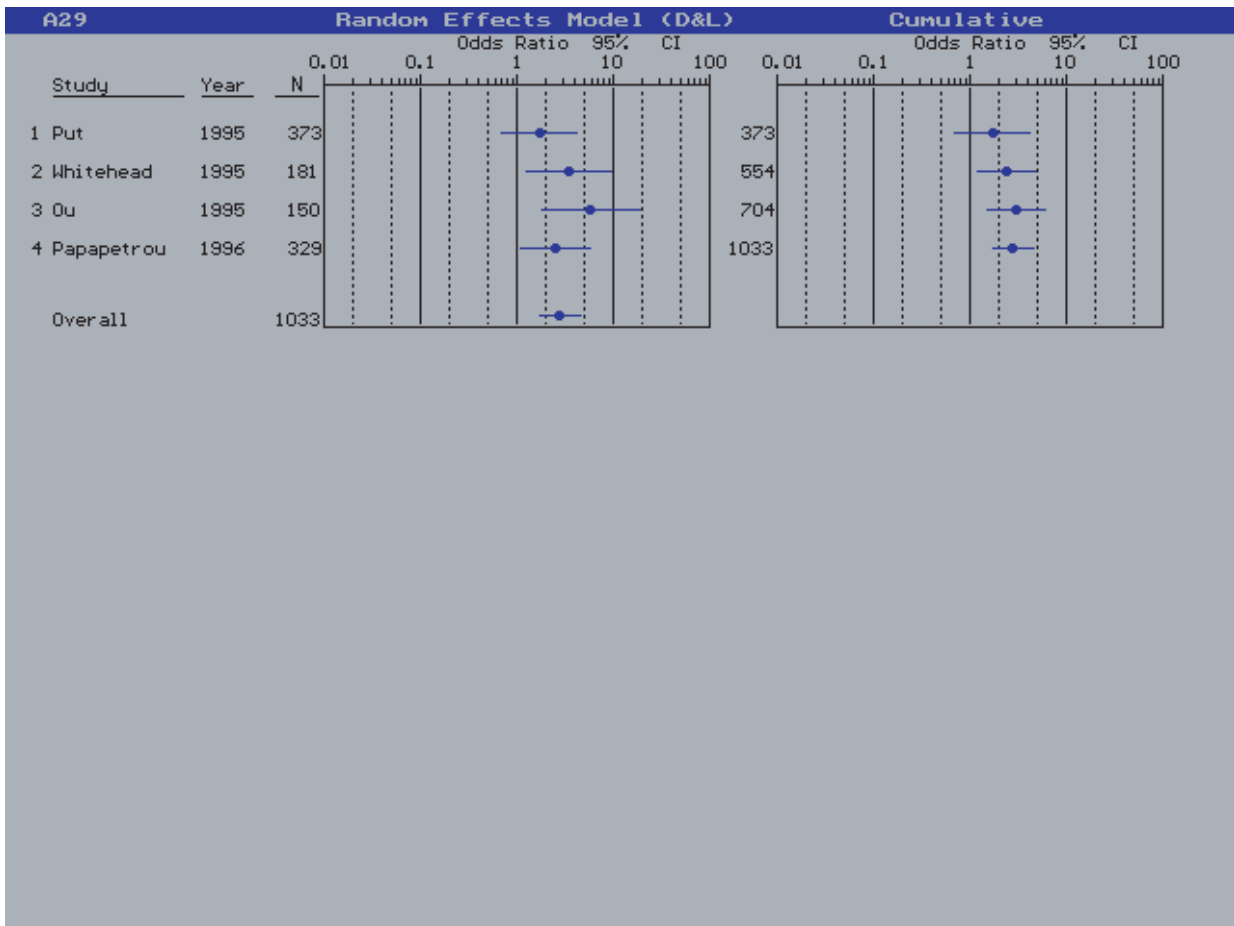

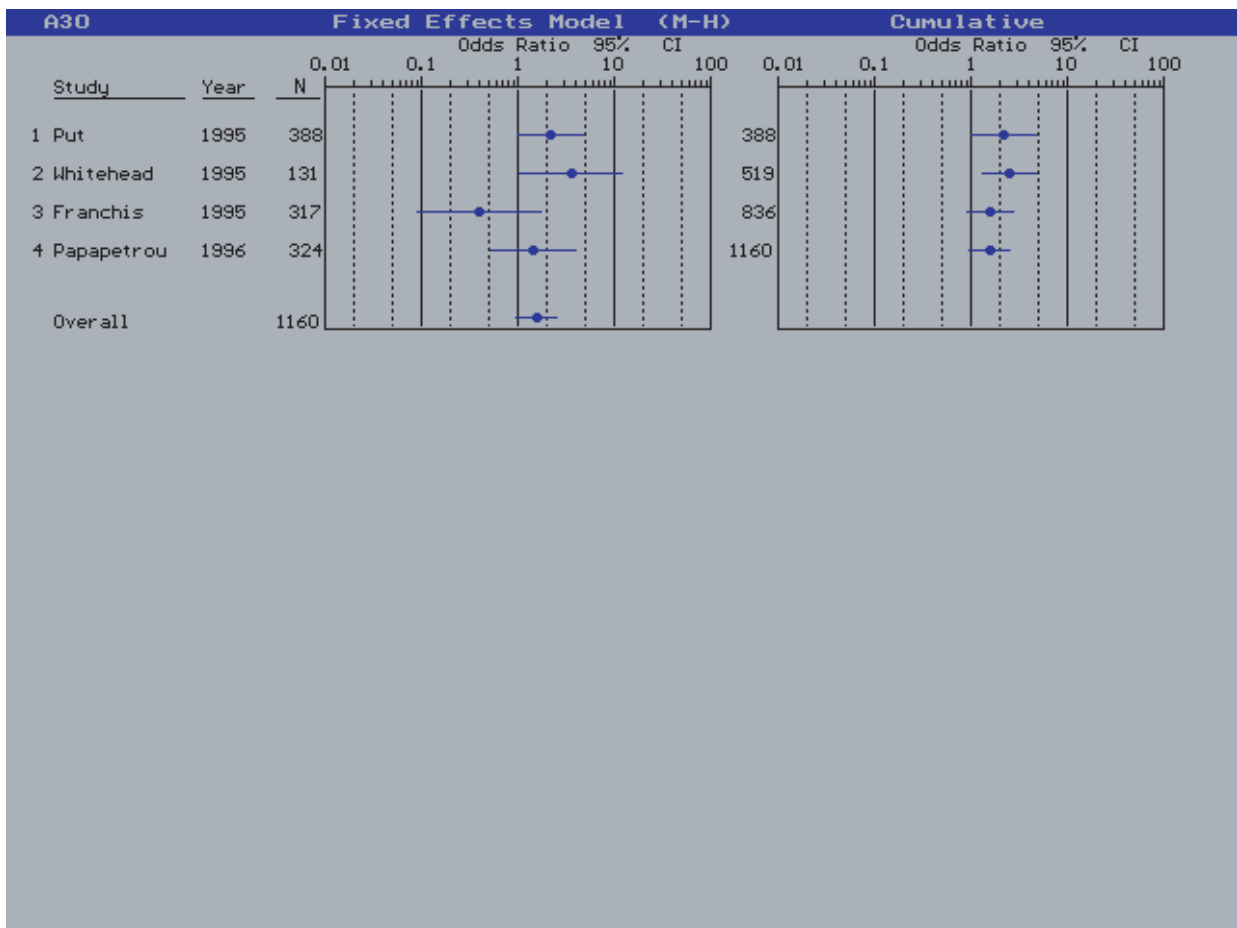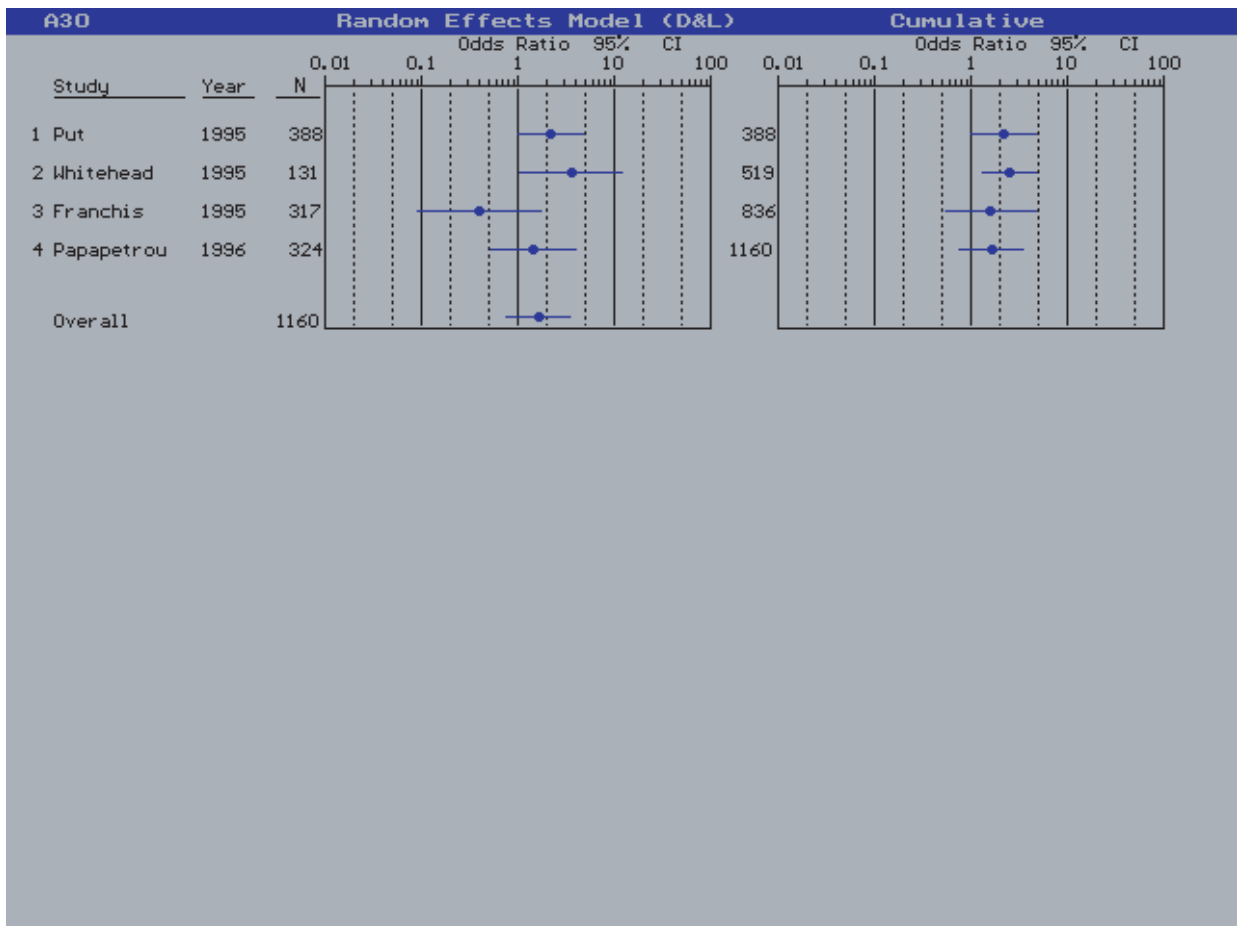

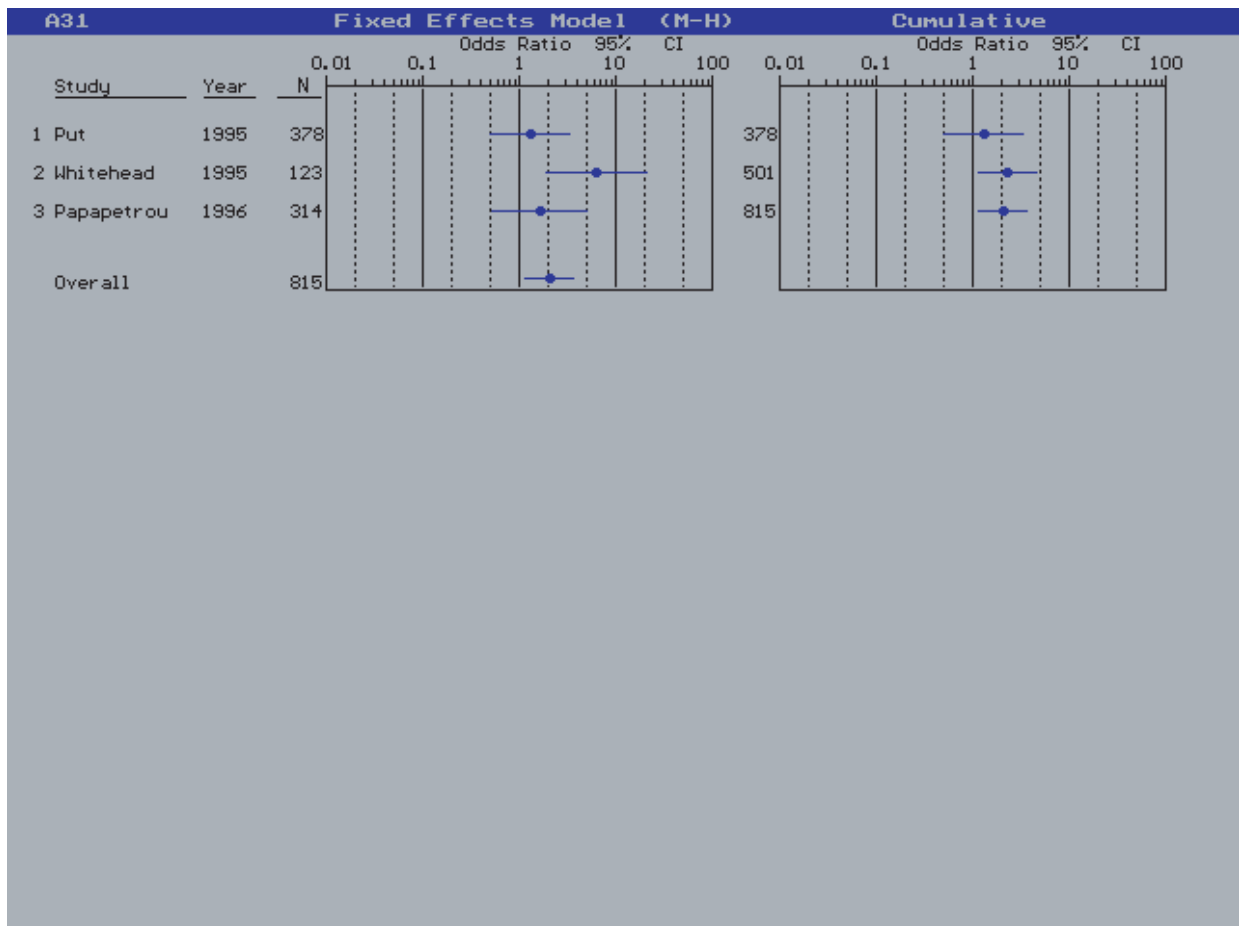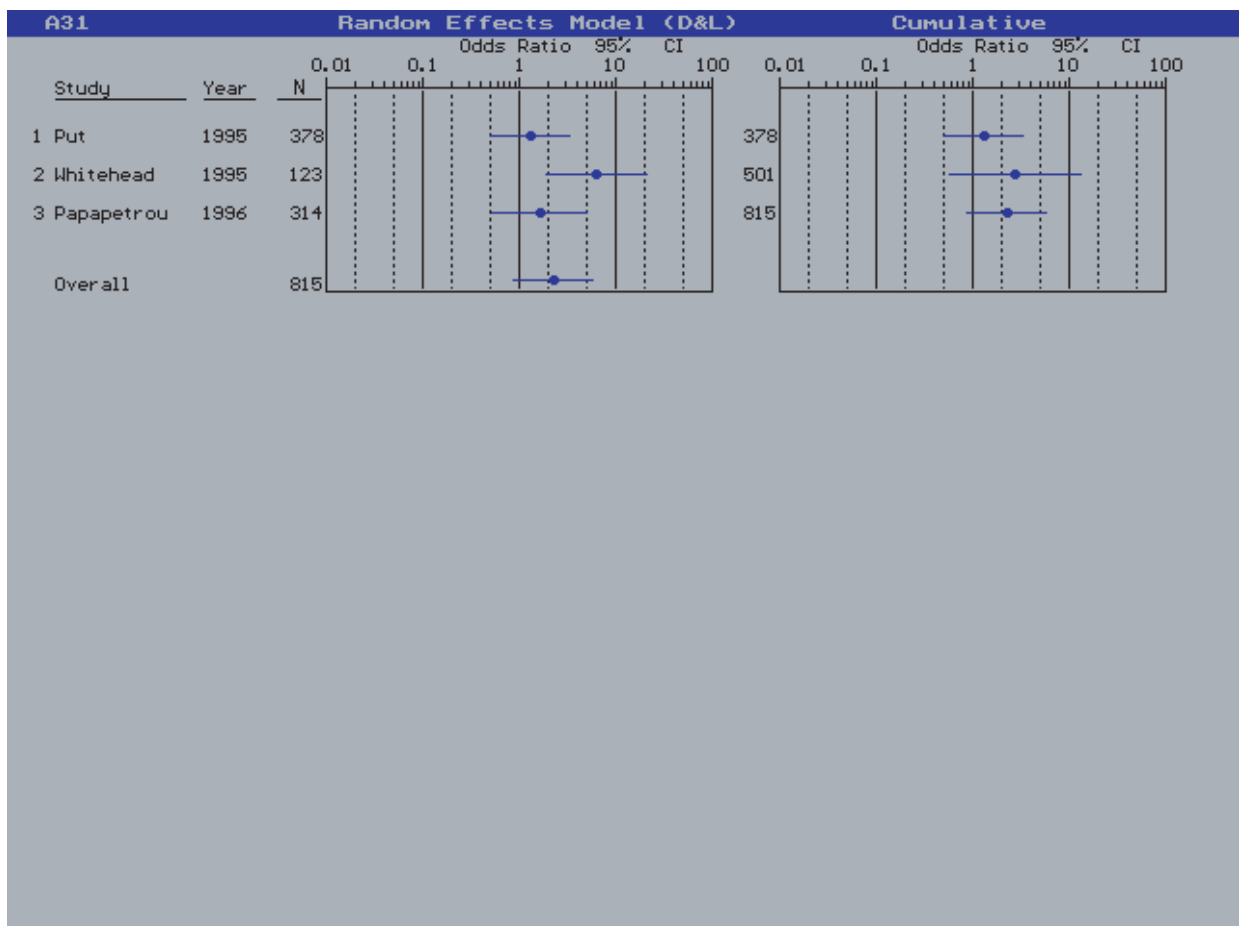



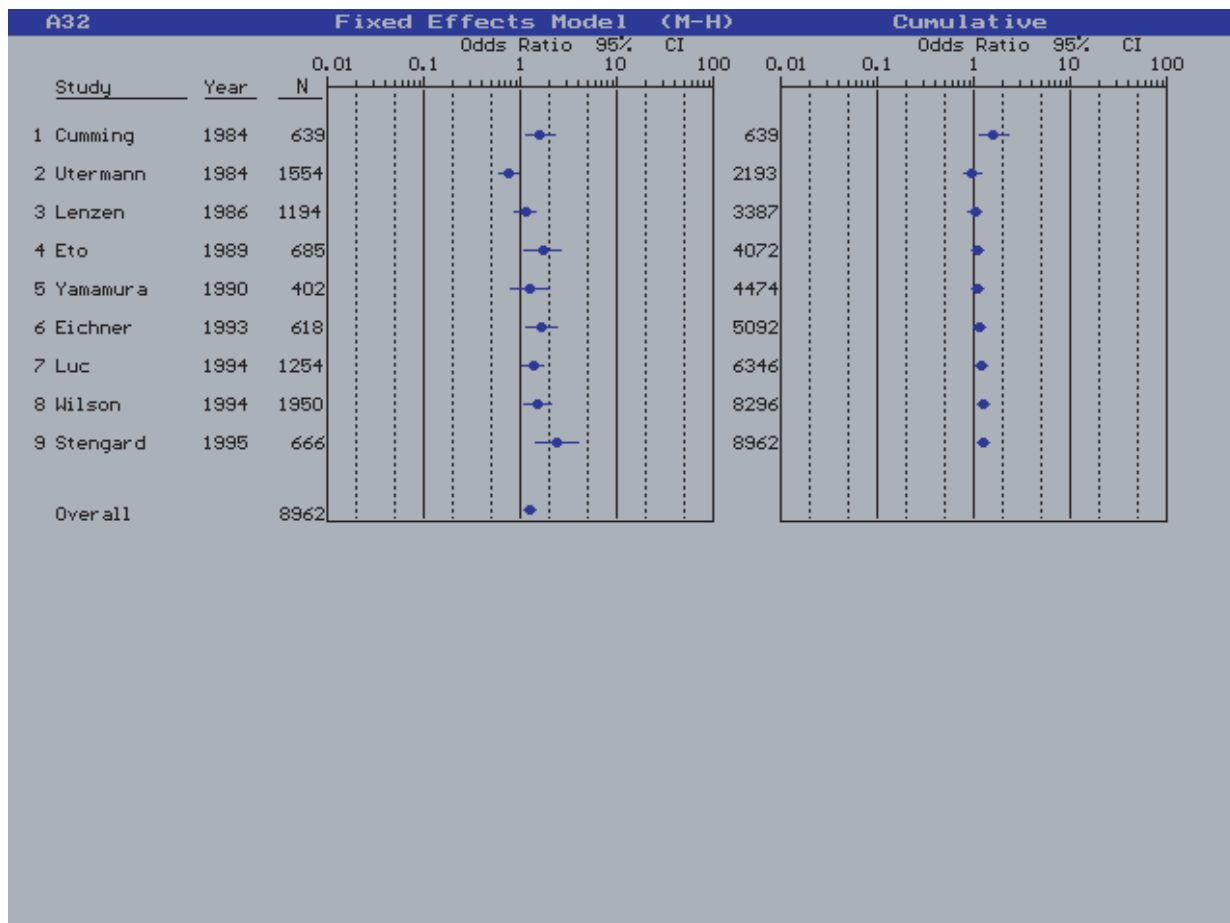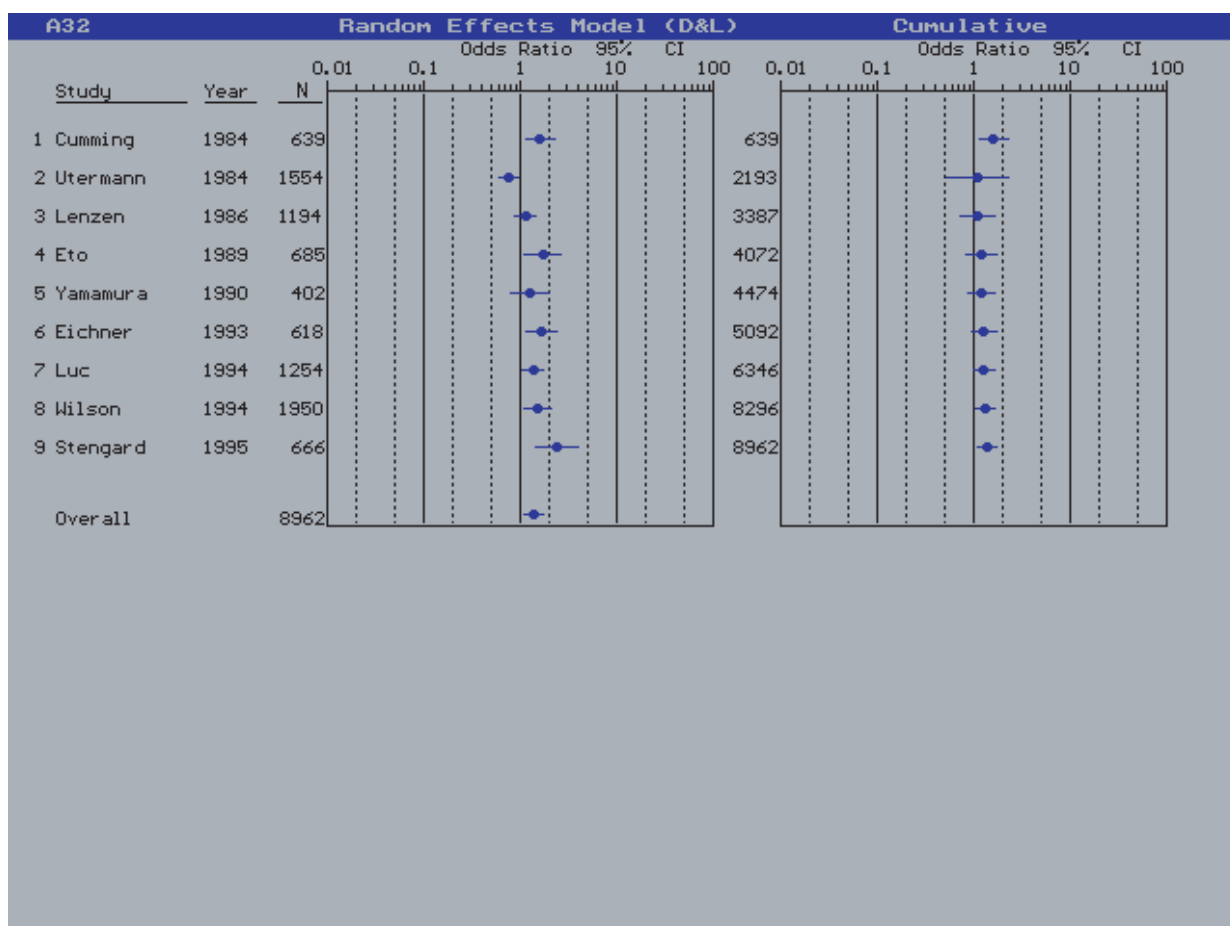

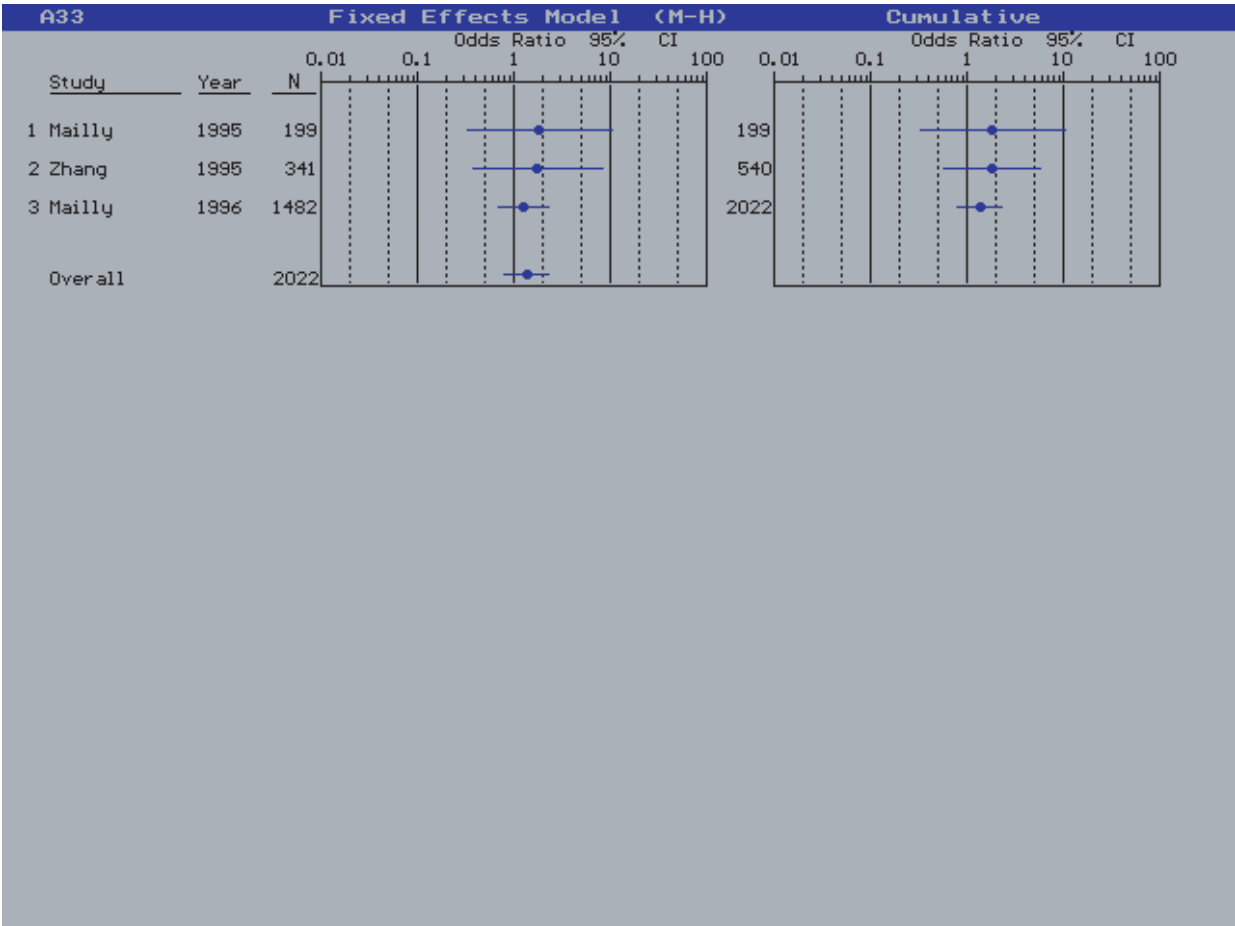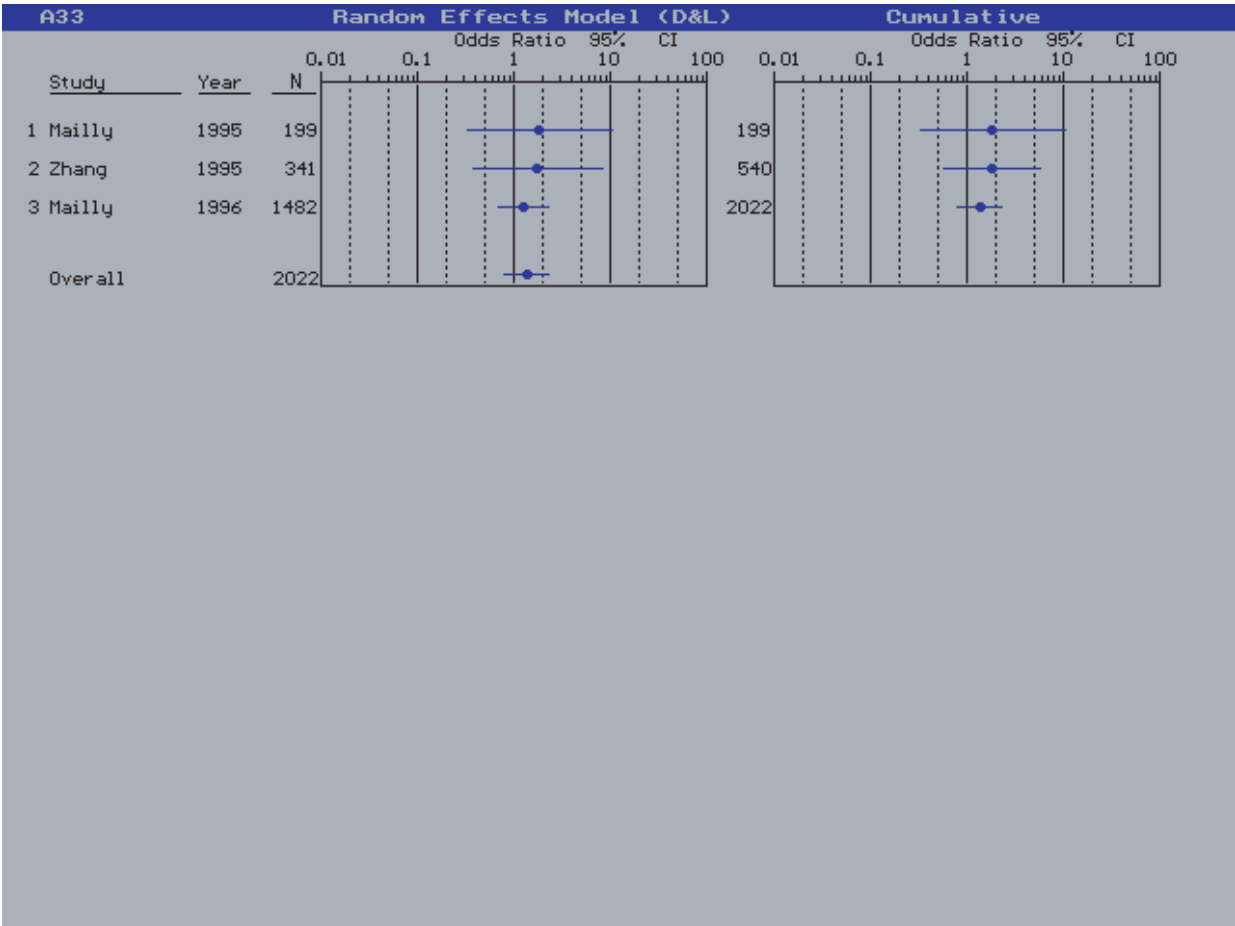

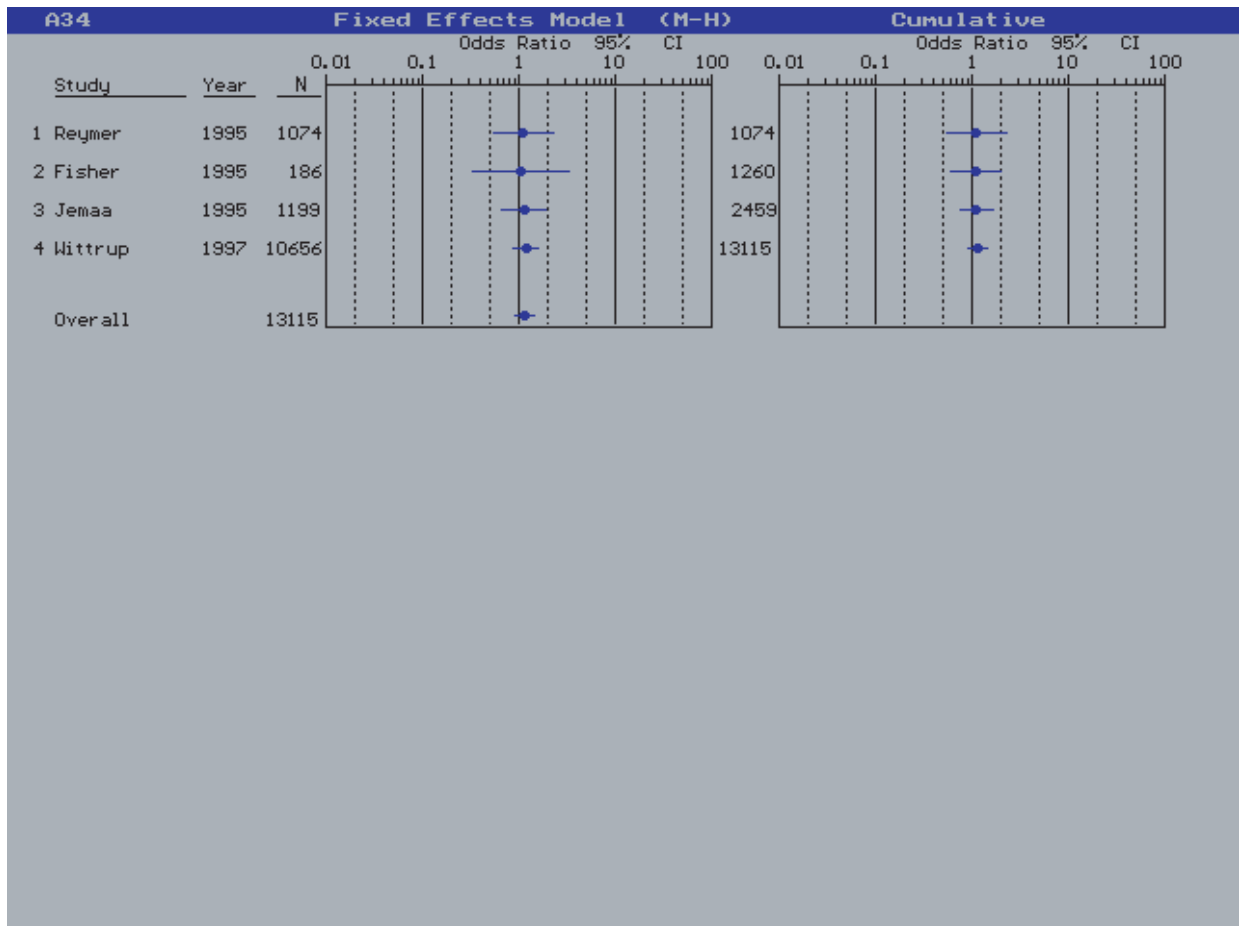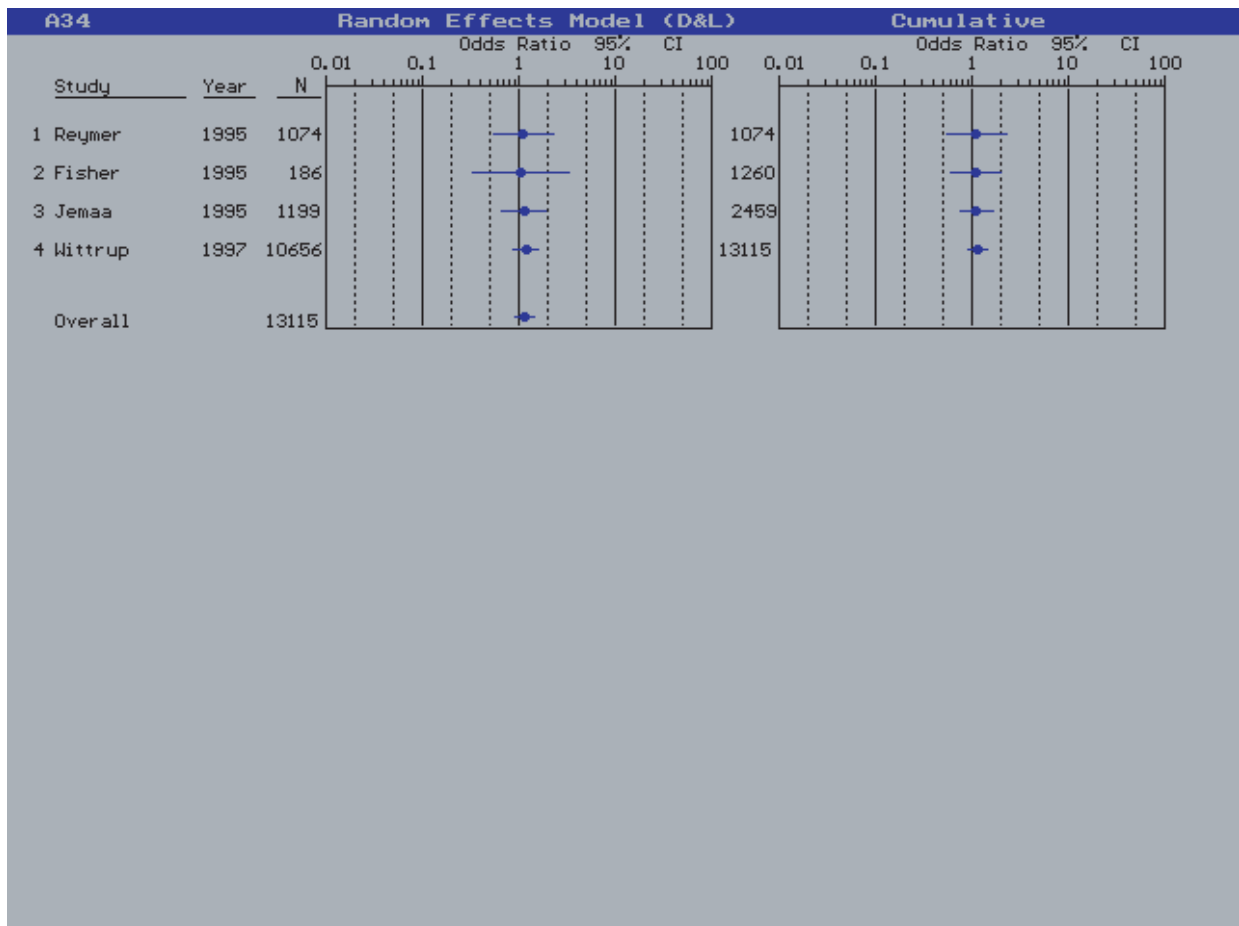

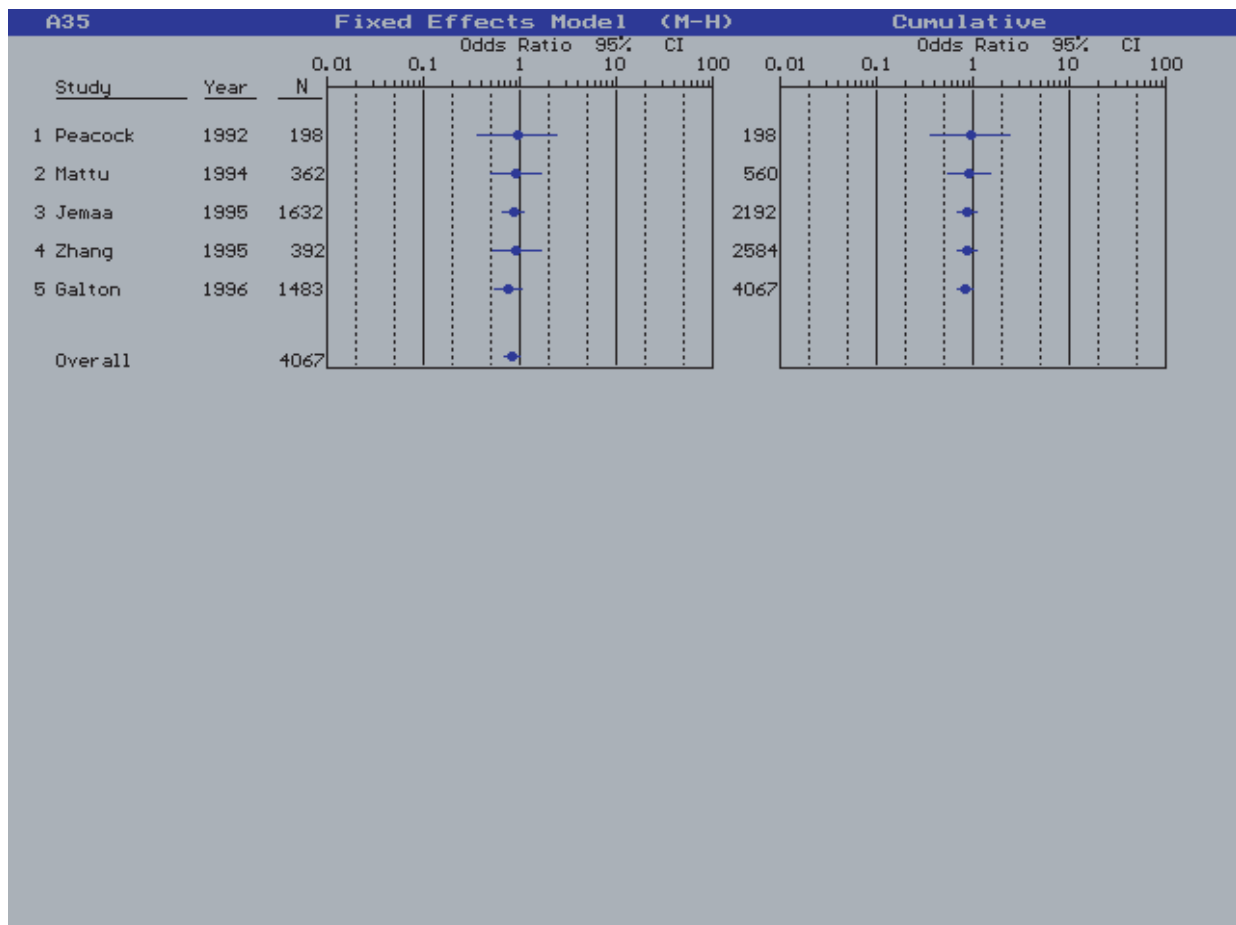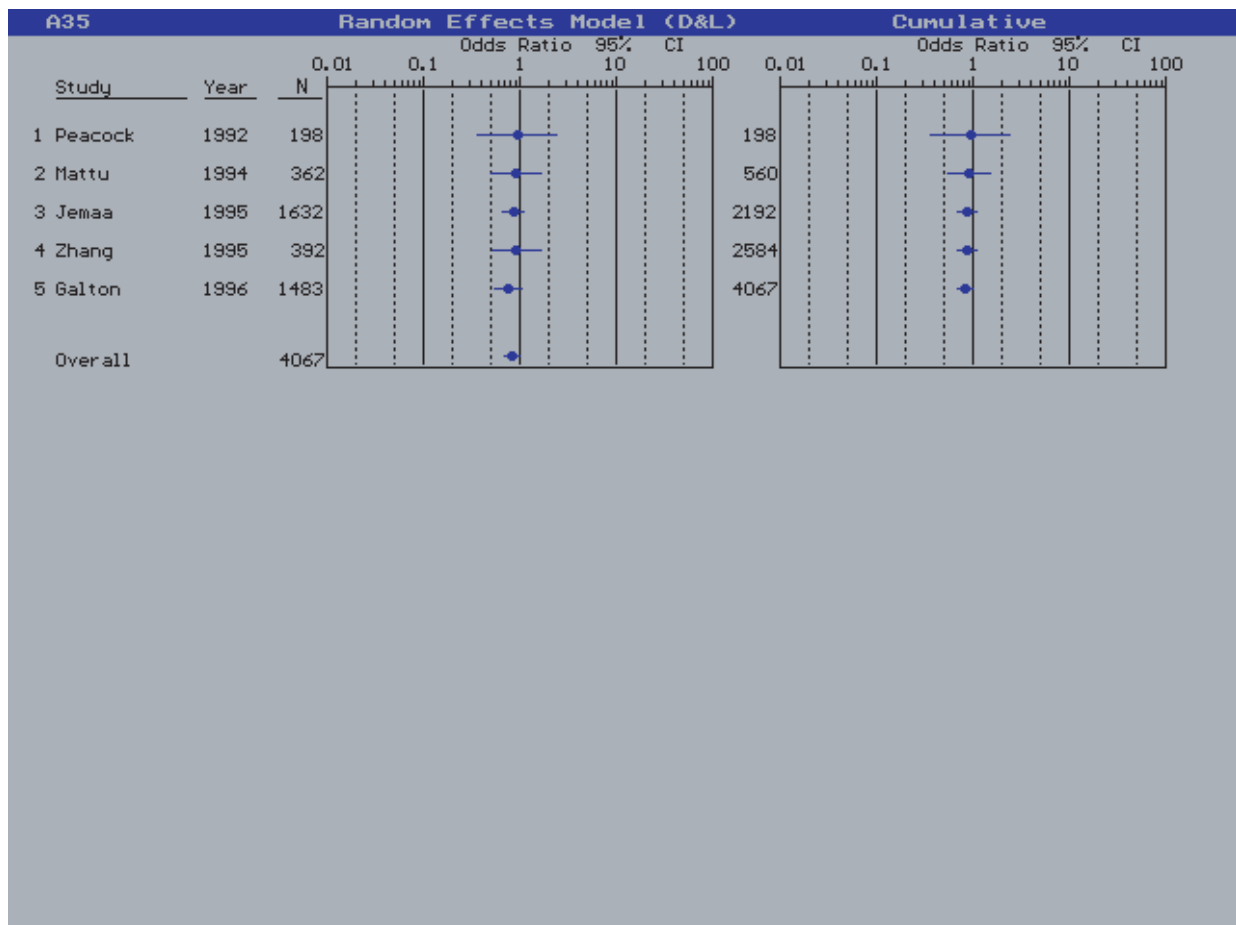

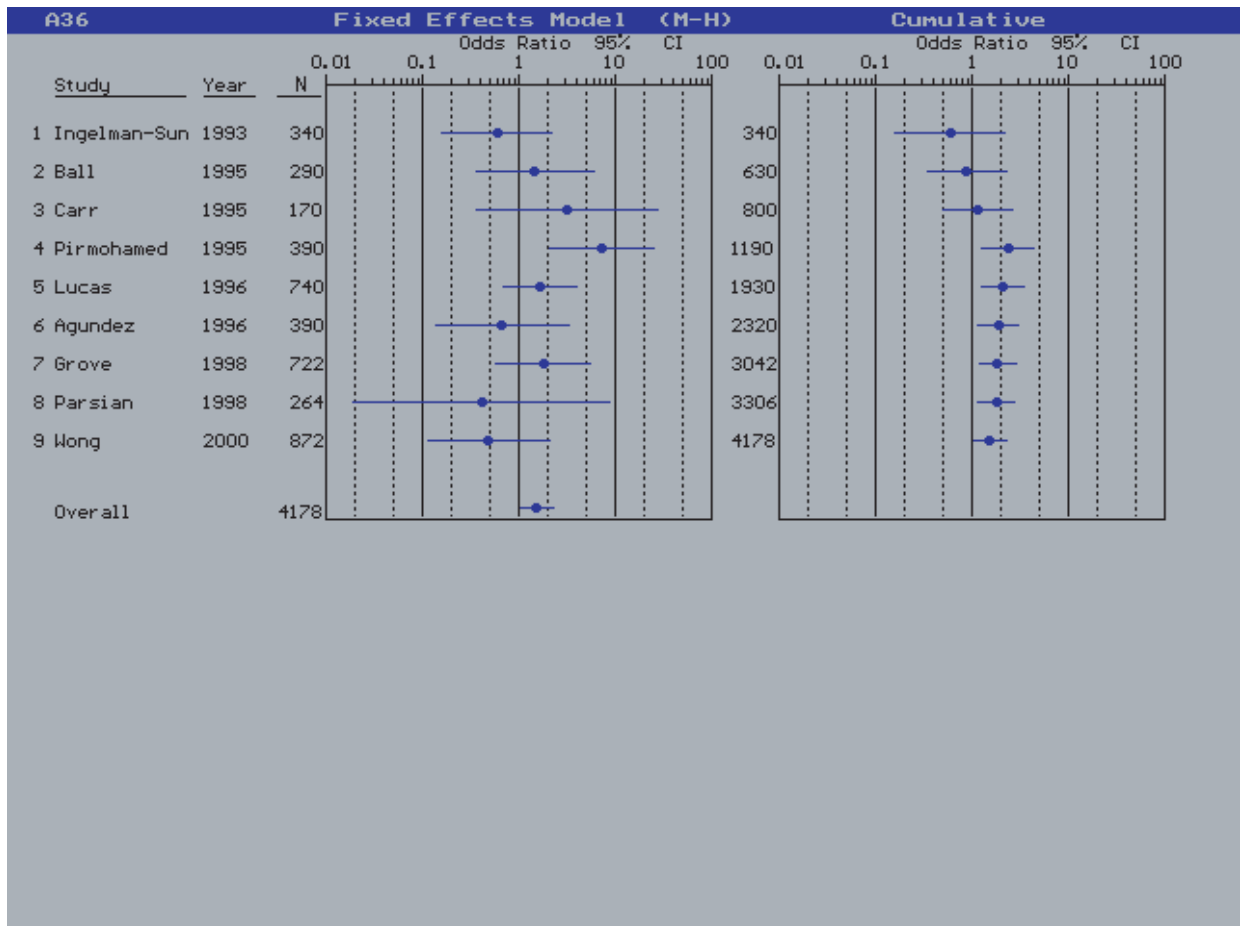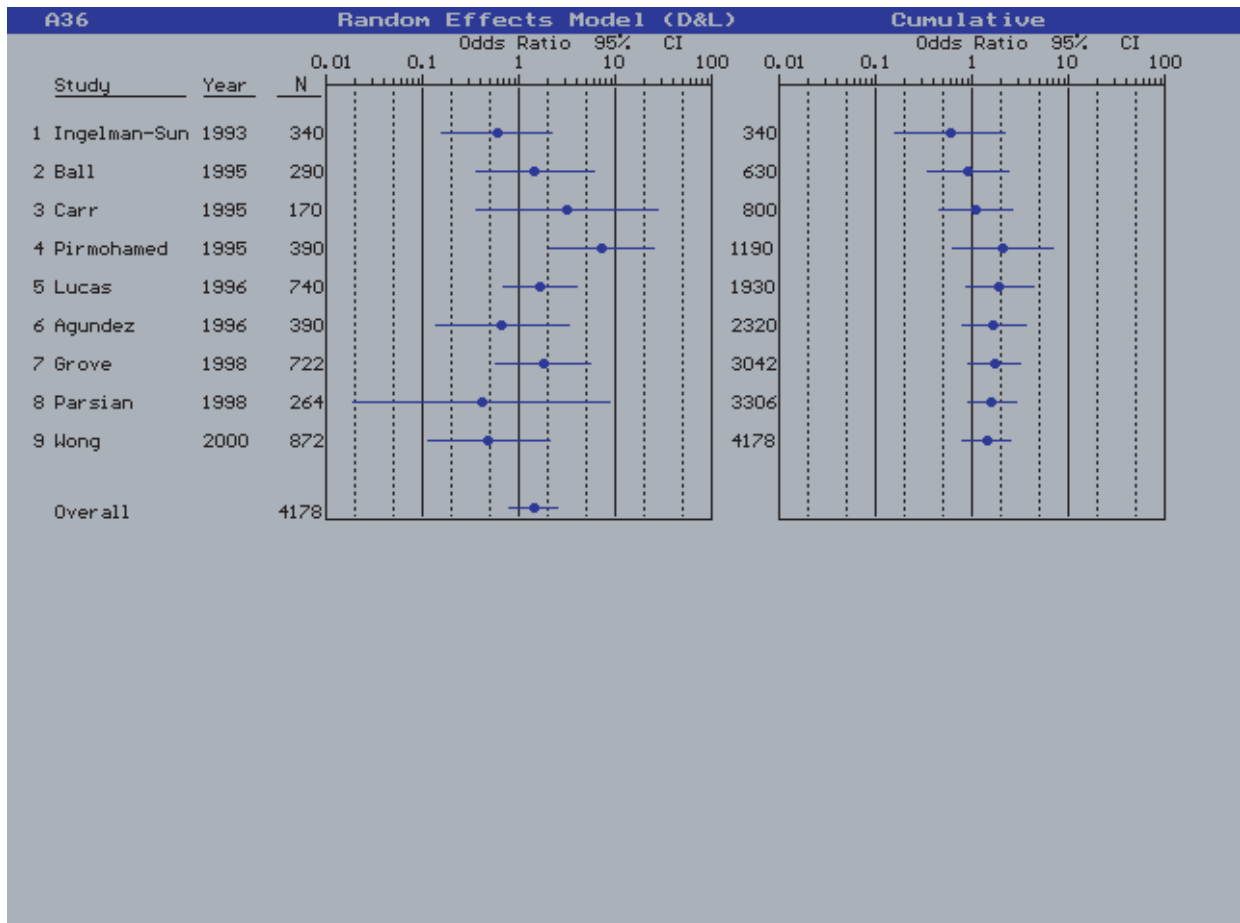

Supplement: 41588_2001_BFng749z_MOESM1_ESM.pdf [file 41588_2001_BFng749z_MOESM1_ESM.pdf]
